# Supplementary material for: Lower levels of high-density lipoprotein cholesterol in urban Africans presenting with communicable versus non-communicable forms of heart disease: the ‘Heart of Soweto’ hospital registry study
Source: PubMed Central journal article supplement — BMJ Open. 2014 Jul 12;4(7):e005069. doi: 10.1136/bmjopen-2014-005069 (PMC4120399; doi:10.1136/bmjopen-2014-005069), 2014-07-12
Supplement: bmjopen-2014-005069.draft_revisions.pdf [file bmjopen-2014-005069.draft_revisions.pdf]

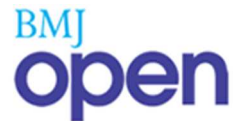

**Low levels of high-density lipoprotein cholesterol is the most prevalent metabolic abnormality in urban Africans with newly diagnosed heart disease: The 'Heart of Soweto' hospital registry study**

|                                 |                                                                                                                                                                                                                                                                                                                                                                                                                                                                                                                                                                                                                                                                                                                                                                                                                                                                                                                                                                           |
|---------------------------------|---------------------------------------------------------------------------------------------------------------------------------------------------------------------------------------------------------------------------------------------------------------------------------------------------------------------------------------------------------------------------------------------------------------------------------------------------------------------------------------------------------------------------------------------------------------------------------------------------------------------------------------------------------------------------------------------------------------------------------------------------------------------------------------------------------------------------------------------------------------------------------------------------------------------------------------------------------------------------|
| Journal:                        | <i>BMJ Open</i>                                                                                                                                                                                                                                                                                                                                                                                                                                                                                                                                                                                                                                                                                                                                                                                                                                                                                                                                                           |
| Manuscript ID:                  | bmjopen-2014-005069                                                                                                                                                                                                                                                                                                                                                                                                                                                                                                                                                                                                                                                                                                                                                                                                                                                                                                                                                       |
| Article Type:                   | Research                                                                                                                                                                                                                                                                                                                                                                                                                                                                                                                                                                                                                                                                                                                                                                                                                                                                                                                                                                  |
| Date Submitted by the Author:   | 17-Feb-2014                                                                                                                                                                                                                                                                                                                                                                                                                                                                                                                                                                                                                                                                                                                                                                                                                                                                                                                                                               |
| Complete List of Authors:       | Lyons, Jasmine; Baker IDI Heart and Diabetes Institute, Preventative Health; University of Melbourne, School of Population and Global Health<br>Sliwa, Karen; University of the Witwatersrand, Soweto Cardiovascular Research Unit<br>Carrington, Melinda; Baker IDI Heart and Diabetes Institute, Preventative Health; University of the Witwatersrand, Soweto Cardiovascular Research Unit<br>Raal, Frederick; University of the Witwatersrand, Carbohydrate and Lipid Metabolism Research Unit<br>Pretorius, Sandra; University of the Witwatersrand, Soweto Cardiovascular Research Unit<br>Thienemann, Freidrich; University of Cape Town, Institute of Infectious Diseases and Molecular Medicine; University of Cape Town, Hatter Institute for Cardiovascular Research in Africa, Cape Heart Group and IIDMM<br>STEWART, SIMON; Baker IDI Heart and Diabetes Institute, Preventative Health; University of the Witwatersrand, Soweto Cardiovascular Research Unit |
| <b>Primary Subject Heading</b>: | Cardiovascular medicine                                                                                                                                                                                                                                                                                                                                                                                                                                                                                                                                                                                                                                                                                                                                                                                                                                                                                                                                                   |
| Secondary Subject Heading:      | Public health                                                                                                                                                                                                                                                                                                                                                                                                                                                                                                                                                                                                                                                                                                                                                                                                                                                                                                                                                             |
| Keywords:                       | Cardiac Epidemiology < CARDIOLOGY, Epidemiology < INFECTIOUS DISEASES, PREVENTIVE MEDICINE                                                                                                                                                                                                                                                                                                                                                                                                                                                                                                                                                                                                                                                                                                                                                                                                                                                                                |
|                                 |                                                                                                                                                                                                                                                                                                                                                                                                                                                                                                                                                                                                                                                                                                                                                                                                                                                                                                                                                                           |

SCHOLARONE™  
Manuscripts

1  
2  
3 **Low levels of high-density lipoprotein cholesterol is the most prevalent metabolic**  
4 **abnormality in urban Africans with newly diagnosed heart disease: The ‘Heart of**  
5  
6 **Soweto’ hospital registry study**  
7  
8  
9

10  
11  
12 **Short title:** Lyons – HDLC in communicable heart disease  
13

14  
15  
16  
17 **Authors:** Jasmine G. Lyons (1,2)  
18 Karen Sliwa (3, 4)  
19 Melinda J. Carrington (1, 4, 5)  
20 Frederick Raal (7)  
21 Sandra Pretorius (3)  
22 Friedrich Thienemann (3, 6, 8)  
23 Simon Stewart (1, 3, 4, 5)  
24  
25  
26  
27  
28  
29

30 **Affiliations:**

- 31  
32 (1) Baker IDI Heart and Diabetes Institute, Melbourne, Australia  
33 (2) School of Population and Global Health, University of Melbourne, Melbourne, Australia  
34 (3) Hatter Institute for Cardiovascular Research in Africa, Cape Heart Group and IIDMM,  
35 University of Cape Town, Cape Town, South Africa  
36  
37 (4) Soweto Cardiovascular Research Unit, University of the Witwatersrand, Johannesburg,  
38 South Africa  
39  
40 (5) Department of Epidemiology and Preventative Medicine, Monash University, Melbourne,  
41 Australia  
42  
43 (6) Institute of Infectious Diseases and Molecular Medicine, University of Cape Town, South  
44 Africa  
45  
46 (7) Carbohydrate and Lipid Metabolism Research unit, University of the Witwatersrand,  
47 Johannesburg, South Africa  
48  
49 (8) Infectious Diseases Referral Clinic, GF Jooste Hospital, Manenberg, South Africa  
50  
51  
52

53  
54  
55 **Address for Correspondence:** Professor Simon Stewart, Preventative Health, Baker IDI Heart  
56 and Diabetes Institute, PO Box 6492, St Kilda Rd Central, Melbourne, Victoria, 8008, Australia  
57  
58 E-mail: [simon.stewart@bakeridi.edu.au](mailto:simon.stewart@bakeridi.edu.au)  
59  
60

Telephone: +61 3 8532 1640

Fax: +61 3 8532 1100

1  
2  
3  
4 **Key Words:** High-density lipoprotein, lipids, infection, epidemiologic transition, Africa.  
5  
6  
7

8 **Word count:** 3247 not including 2 tables, 3 figures and 33 references.  
9  
10  
11  
12  
13  
14  
15  
16  
17  
18  
19  
20  
21  
22  
23  
24  
25  
26  
27  
28  
29  
30  
31  
32  
33  
34  
35  
36  
37  
38  
39  
40  
41  
42  
43  
44  
45  
46  
47  
48  
49  
50  
51  
52  
53  
54  
55  
56  
57  
58  
59  
60

For peer review only

**ABSTRACT**

**Objectives:** To investigate if urban Africans displayed abnormal lipid levels- in particular, lower levels of atheroprotective high-density lipoprotein cholesterol (HDLC) - when presenting with communicable versus non-communicable forms of heart disease (HD).

**Design:** Prospective clinical registry of 5328 *de novo* cases of HD over a 3-year period.

**Setting:** Cardiology Unit, Baragwanath Hospital in Soweto, South Africa.

**Participants:** A total of 1199 patients of African descent (59% female; 57.0±13.4 years) had fasting blood lipid levels (Total cholesterol [TC], triglyceride, HDLC, and low density lipoprotein [LDLC] cholesterol) documented on admission.

**Main outcome measures:** Lipid profiles were compared according to pre-specified classification of non-communicable (e.g. hypertensive heart disease) versus communicable (e.g. rheumatic heart disease;) HD.

**Results:** Overall 694 (58%) of those presenting with HD had low HDLC levels; 344 of 678 (51%) and 350 of 521 (67%) for non-communicable and communicable, respectively ( $p<0.001$ ). By comparison, overall prevalence of high TC was 32%, high LDLC was 37%, and obesity (body mass index  $>30$  kg/m<sup>2</sup>) was 40%. On an adjusted basis, those with non-communicable HD were more likely to record a low HDLC relative to non-communicable presentations (OR 1.91, 95%CI 1.42, 2.57;  $p<0.001$ ).

**Conclusions:** Despite largely favourable lipid profiles, there are clear differences according to aetiology of underlying HD in urban Africans. Younger Africans with communicable HD have particularly low levels of HDLC that, if persistent in the longer-term, may expose them to increased risk of atherosclerotic forms of cardiovascular disease.

## ARTICLE SUMMARY

### Article focus:

- In sub-Saharan Africa, the incidence of non-communicable cardiovascular disease is increasing while, simultaneously, communicable forms of heart disease continue to cause considerable levels of morbidity and mortality.
- In this study, we have sought to explore one heart disease risk factor, dyslipidaemia, in a well-defined clinical registry in Soweto, South Africa.
- Lipid profiles from 1199 de novo presentations of heart disease were compared according to pre-specified classification of non-communicable heart disease (e.g. hypertensive heart disease) versus communicable forms of heart disease (e.g. pericarditis or chronic rheumatic heart disease). We hypothesised that those diagnosed with communicable heart disease would display an adverse lipid profile, with low levels of atheroprotective high-density lipoprotein cholesterol (HDLC). We also investigated the potential interaction of the inflammatory marker C-reactive protein (CRP) and low HDLC in a subset of these patients.

### Key messages:

- We describe distinct patterns of dyslipidaemia according to underlying heart disease aetiology: significantly decreased levels of HDLC, total cholesterol and low-density lipoprotein cholesterol in those with communicable heart disease (representing 43% of cohort) compared to those with non-communicable heart disease (57% of cohort).
- In adjusted analyses, low HDLC was more pronounced in those with communicable heart disease. In those with high CRP levels, we present novel data showing a sex-disparate relationship between CRP and low HDLC, with a strong relationship between high CRP and low HDLC in females only.
- The high prevalence of low HDLC in a relatively young population of urban Africans may, if persistent in the longer-term, confer greater risk of atherosclerotic heart disease

### Strengths and limitations of the study:

- We report a high prevalence of low HDLC in *de novo* presentations of communicable heart disease compared with non-communicable heart disease.
- The study cohort is clinically very well defined; however the lipid data were obtained according to clinical presentation, which may impose systematic bias to the results.
- This hospital registry study has provided preliminary data that would support prospective investigation of longer-term dyslipidaemia patterns and their impact on heart disease incidence, both in South Africa and in other low-and-middle-income countries where the epidemiologic transition is currently underway.

## INTRODUCTION

1  
2  
3  
4  
5  
6  
7  
8  
9  
10  
11  
12  
13  
14  
15  
16  
17  
18  
19  
20  
21  
22  
23  
24  
25  
26  
27  
28  
29  
30  
31  
32  
33  
34  
35  
36  
37  
38  
39  
40  
41  
42  
43  
44  
45  
46  
47  
48  
49  
50  
51  
52  
53  
54  
55  
56  
57  
58  
59  
60

Heart diseases with infectious aetiology have long been the principal forms of cardiovascular disease (CVD) in Sub-Saharan Africa. However, epidemiological transition has seen increased prevalence of non-communicable forms of heart disease in these populations[1]. This phenomenon is largely driven by complex, population-wide changes in demographic, social and economic status, with associated changes in lifestyle habits[2, 3, 4]. Indicative of the tension between 'old' and 'new' forms of heart disease, the incidence of communicable heart disease (HD) is sustained by the devastating epidemics of human immunodeficiency virus/acquired immune deficiency syndrome (HIV/AIDS), tuberculosis (TB), rheumatic heart disease (RHD) and parasitic infections with cardiac involvement[5, 6, 7], while in parallel, the prevalence of risk factors for non-communicable HD increases[8].

Low serum levels of high-density lipoprotein cholesterol (HDL) are consistently and independently associated with increased risk of atherosclerotic forms of CVD[9, 10]. However, it remains uncertain whether low HDL is causal or just a cardiovascular risk marker[11]. There are several causes of low HDL levels, including overweight, obesity, tobacco smoking, and insulin resistance/type 2 diabetes mellitus, indicative of the important role lifestyle factors have in mediating HDL levels[9]. Additionally, low HDL is a striking consequence of abnormal lipid metabolism in infection and inflammation[12]. Although it has been shown that those of African descent largely show a favourable lipid profile[13], it is unlikely that such lipid profiles remain athero-protective during an infected state[14]. Indeed, in this setting, it is probable that increasing prevalence of modifiable/ lifestyle risk factors contribute to a more advanced presentation in those with communicable HD[8]. We have previously reported that in the geographically compact townships that comprise Soweto in South Africa, 'old' and 'new' forms of HD are simultaneously present[8]. While this tension exists, we have a unique opportunity to explore lipid profiles in patients presenting with non-communicable versus communicable forms of HD.

## STUDY HYPOTHESES

1 Having shown important ethnic differences in the lipid profiles of patients of African descent  
2 presenting with HD in the urban African enclave of Soweto[13], we hypothesised that  
3 independent of age and sex, urban Africans presenting with communicable HD will demonstrate  
4 patterns of dyslipidaemia associated with infection/inflammation, particularly sub-optimal levels  
5 of HDLC, versus non-communicable HD.  
6  
7  
8  
9  
10

## 11 **METHODS**

### 12 **Study Setting & Design**

13 As described in detail previously[8, 15] the 3,500 bed Chris Hani Baragwanath Hospital (case  
14 load of > 125,000 in-patients per annum) services the tertiary care needs of Soweto (population  
15 of 1.1 million) and surrounding communities. All suspected cardiac presentations are referred to  
16 the hospital's Cardiology Unit for advanced diagnostic testing and gold-standard treatments. A  
17 prospective clinical registry of all *de novo* presentations of the same was established in 2006 as  
18 part of the Heart of Soweto Study and represents sub-Saharan Africa's largest and most  
19 detailed study of advanced forms of HD to date[15].  
20  
21  
22  
23  
24  
25  
26  
27  
28  
29  
30  
31

### 32 **Participants**

33 The 'Heart of Soweto' cohort of *de novo* case presentations comprised 5328 patients. Of these,  
34 2185 patients (40%) had a documented fasting lipid profile (serum total cholesterol (TC) level,  
35 triglyceride, HDLC and calculated low-density lipoprotein cholesterol (LDLC)[16] undertaken at  
36 Baragwanath Hospital on-site pathology). None of the patients were on lipid lowering agents at  
37 the time of presentation, as this medication can only be prescribed at the tertiary institution.  
38 However some of the patients had been placed on anti-hypertensive medication prior to their  
39 first assessment at the Cardiac Clinic at Baragwanath Hospital. Moreover, only a small number  
40 of patients (39 cases) had been prescribed anti-retroviral therapy (ART) on presentation. The  
41 study was approved by the University of the Witwatersrand Ethical Committee and conforms to  
42 the principles outlined in the Declaration of Helsinki. All patients provided informed consent.  
43  
44  
45  
46  
47  
48  
49  
50  
51  
52  
53  
54  
55

### 56 **Study Data**



1 A complete list of study data captured by the registry, comprising basic socio-demographic  
2 (including self-reported ethnicity, years of education and determining if the patient was born in  
3 Soweto) and advanced clinical profiling, has been described previously[8, 15] The registry  
4 captured all advanced clinical investigative procedures (e.g. coronary angiography, which was  
5 undertaken in all people diagnosed with coronary artery disease (CAD)). Echocardiography  
6 (performed on all patients) criteria used in the study has been described in detail previously[8,  
7 15].

### 14 **Case Classifications**

17 Adjudication and classification of communicable and non-communicable presentations of HD in  
18 this cohort have been previously described[8]. After exclusion of those with uncomplicated  
19 hypertension (i.e. without evidence of cardiac dysfunction, n=380) or other non-modifiable  
20 aetiologies (e.g. congenital disorders), 1199 patients of African descent (22% of the total 'Heart  
21 of Soweto' cohort) were included in this analysis. Contributory diagnoses for non-communicable  
22 HD were predominantly hypertensive heart failure (HT-HF) and coronary artery disease (without  
23 HIV). Communicable heart disease was predominantly classified as HIV-dilated cardiomyopathy  
24 (HIV-DCMO), HIV-pulmonary hypertension, TB pericardial disease, and pericarditis due to other  
25 infection.

### 36 **Risk factor definition**

37 Optimum lipid levels and treatment goals with established CVD were defined according to  
38 international guidelines[9] adopted by the Lipid and Atherosclerosis Society of South Africa and  
39 the South African Heart Association - high TC: >4.5 mmol/L, high TGs: >1.7 mmol/L, high LDLC:  
40 >2.5 mmol/L and low HDLC: <1.0 for males and <1.2 mmol/L for females[17]. Other risk factors  
41 were measured on a clinical basis, as previously described[15]. Anthropometric measurements  
42 were available for calculation of body mass index (BMI, kg/m<sup>2</sup>) in 854 (71%) cases, the low  
43 reporting rate restricted to ambulatory patients. Obesity was defined as BMI ≥ 30 kg/m<sup>2</sup>. Serum  
44 C-reactive protein (CRP) was measured in a sub-set of 367 patients (31% of all cases) if  
45 clinically indicated (e.g. suspected infection). Patients were stratified into clinically relevant CRP  
46 categories[18], as defined by Dhingra and colleagues[19]. Patients with a CRP of 1 mg/L (n=19)

1 were used as reference group and compared to medium (1.1-3.0 mg/L, n=26), high (3.1-10.0  
2 mg/L, n=83) and very high (>10.0 mg/L, n=239) CRP categories.  
3

#### 4 **Statistical analyses**

5  
6 Normally distributed continuous data are presented as the mean  $\pm$  standard deviation and non-  
7 Gaussian distributed variables as the median (inter-quartile range). Categorical data are  
8 presented as sample number and percentages. For group comparisons, we initially used Chi  
9 Square ( $\chi^2$ ) analysis with calculation of odds ratios (OR) with 95% confidence intervals (CI)  
10 presented where appropriate for discrete variables, and independent T-tests for normally  
11 distributed continuous variables and Mann-Whitney U test for nonparametric continuous  
12 variables. Multiple logistic regression analyses (entry model) were used to derive age and sex  
13 adjusted ORs (and BMI in some analyses, as described) for the risk of presenting with clinically  
14 relevant variables (primarily dyslipidaemia profiles), according to CD HD relative to NCD  
15 diagnosis. Significance was accepted at the two-sided level of  $p < 0.05$ .  
16  
17  
18  
19  
20  
21  
22  
23  
24  
25  
26  
27  
28  
29  
30  
31  
32  
33  
34  
35  
36  
37  
38  
39  
40  
41  
42  
43  
44  
45  
46  
47  
48  
49  
50  
51  
52  
53  
54  
55  
56  
57  
58  
59  
60

## RESULTS

### Clinical and Demographic Profile

**Table 1** shows the socio-demographic and clinical profile of this cohort according to cardiac aetiology. Those presenting with non-communicable HD (n=678, 56.5% of cohort) were older and had higher BMI and mean SBP and DBP than those with communicable HD (n=521, 43.5%; all comparisons p<0.001). Overall, 76 (6%) were confirmed HIV-positive, with an expected significantly higher prevalence in those with communicable HD (n=61, 12%, p<0.001). Apart from higher BMIs in women ( $30.6 \pm 6.9$  vs.  $26.7 \pm 5.5$  kg/m<sup>2</sup> in males, p<0.001) there were no significant differences between sexes in respect to other clinical parameters.

### Aetiology of heart disease (primary diagnosis)

Overall, the most prevalent primary diagnoses were HT-HF (n=461, 38%), dilated cardiomyopathy (DCMO, n= 178, 15%) and CAD (n=157, 12%). In those classified as non-communicable HD, HT-HF was the main primary diagnosis (n=461, 68%), along with CAD (without concurrent HIV-infection; n=157, 23%). Dilated cardiomyopathy (n=178, 34%), right heart failure (n=92, 18%) and right heart disease (n=63, 12%) and other forms of primary valve disease (n=71, 14%), were the most common diagnoses in those classified with communicable forms of HD.

### Lipid Profiles

There were significant reductions in TC, LDLC and HDLC in those with communicable forms of HD (**Table 1** and **Figure 1**, p<0.001 for all comparisons). Overall, women had significantly higher TC ( $4.2 \pm 1.3$  mmol/L vs.  $3.8 \pm 1.2$  mmol/L, p<0.001); LDLC ( $2.4 \pm 1.0$  mmol/L vs.  $2.2 \pm 1.0$  mmol/L, p<0.01), and HDLC compared to men ( $1.2 \pm 0.5$  mmol/L vs.  $1.0 \pm 0.5$  mmol/L, p<0.001). This gender difference did not extend to triglycerides ( $1.1(0.4-1.8)$  mmol/L vs.  $1.1(0.4-1.8)$ , p=0.7) nor TC:HDLC ratio ( $4.2 \pm 3.1$  mmol/L vs.  $4.3 \pm 2.7$  mmol/L, p=0.6).

Levels of TC (Figure 1A), HDLC (Figure 1B) and LDLC (Figure 1C) were significantly higher in females with non-communicable HD (**Figure 1**). However in those diagnosed with communicable HD, small, but significant, differences were observed only for TC and HDLC, not LDL (**Figure 1**). Overall, prevalence of dyslipidaemia varied from 18% of patients with high

1 triglycerides to 58% with low HDLC (**Table 1** and **Figure 2**). Consistent with the decrease  
2 observed with the actual levels, prevalence of high TC and high LDLC was increased in those  
3 with non-communicable HD aetiologies while low HDLC levels prevalence was higher in those  
4 with communicable HD (**Table 1 and Figure 2**). There were no patients with TG levels > 4.5  
5 mmol/L (range 0.1-3.8 mmol/L) which makes use of the Friedewald equation suitable for this  
6 cohort[16].  
7  
8  
9  
10  
11

12 **Table 2** shows independent associations between relevant socio-economic, demographic and  
13 clinical variables and communicable HD aetiology, relative to those presenting with non-  
14 communicable HD. The effect of HD aetiology on low HDLC dyslipidaemia was strong and  
15 consistent: adjusting for age, sex and BMI of patients, those with forms of communicable HD  
16 were significantly more likely to record a low HDLC relative to those presenting with non-  
17 communicable HD (**Table 2**,  $p<0.001$ ) and less likely to record high TC and LDLC (**Table 2**).  
18 Patients with communicable HD were less likely to record high triglyceride levels (OR 0.65,  
19 95%CI 0.51, 0.84,  $p<0.05$ ) compared to those with non-communicable HD.  
20  
21  
22  
23  
24  
25  
26  
27  
28  
29  
30  
31  
32

### 33 **CRP subset analysis**

34 Overall, there was no significant difference in CRP levels between aetiology groups (**Table 1**).  
35 The proportion of confirmed HIV cases in this CRP subset analysis was 7% (n=27). Of those, 23  
36 were in the very high-risk category. There was also no association between CRP-derived risk  
37 categories and high TC, LDLC or triglycerides (data not shown). However the risk of having low  
38 HDLC increased with increasing CRP levels. In age and sex-adjusted analyses, those with  
39 medium risk (OR 2.73, 95% CI 0.68, 10.89,  $P=0.16$ ), high risk (OR 4.98, 95% CI 1.46, 17.00,  
40  $P=0.01$ ) and very high risk (OR 6.37, 95% CI 1.97, 20.57,  $p<0.01$ ) CRP levels were significantly  
41 more likely to record a low HDLC relative to those in the low risk CRP group. Also, when  
42 stratified by sex, a strong, positive association remained in females but was no longer apparent  
43 in males (**Figure 3**). In females, the pattern was significant across all CRP risk categories:  
44 compared to low risk, those with medium risk (OR 12.1, 95% CI 1.21, 120,  $p=0.03$ ), high risk  
45 (OR 14.4, 95% CI 1.64, 126,  $p=0.02$ ) and very high risk (OR 23.5, 95% CI 2.81, 197,  $p=0.004$ )  
46  
47  
48  
49  
50  
51  
52  
53  
54  
55  
56  
57  
58  
59  
60

1 CRP levels were all more likely to record a low HDLC. Moreover, the association was not  
2 weakened by addition of BMI into the model (BMI and CRP measurements available in only 230  
3 cases) in overall and female-only (n=133) models: those with medium risk (OR 20.5, 95% CI  
4 1.72, 246, p=0.02), high risk (OR 10.6, 95% CI 1.14, 98.8, p=0.04) and very high risk (OR 21.0,  
5 95% CI 2.38, 185, p<0.01) CRP levels were all more likely to record a low HDLC.  
6  
7  
8  
9  
10  
11  
12  
13  
14  
15  
16  
17  
18  
19  
20  
21  
22  
23  
24  
25  
26  
27  
28  
29  
30  
31  
32  
33  
34  
35  
36  
37  
38  
39  
40  
41  
42  
43  
44  
45  
46  
47  
48  
49  
50  
51  
52  
53  
54  
55  
56  
57  
58  
59  
60

For peer review only

## DISCUSSION

1  
2 We report significant decreases in lipid levels (TC, HDLC and LDLC) and age and BMI  
3 according to non-communicable and communicable manifestations of *de novo* HD in urban  
4 Africans, patterns that were observed in both sexes. The high prevalence of low HDLC in more  
5 than half of all cases, but much higher in those with communicable HD, is most striking. Also, it  
6 appears that gender is an effect modifier in the relationship between CRP and low HDLC in this  
7 cohort, but, importantly, the relationship remains even after adjustment for the significant  
8 confounder of adiposity.  
9

10  
11 While traditionally uncommon[20], dyslipidaemia, in particular low HDLC, is becoming  
12 more prevalent in sub-Saharan Africa[21]. The low lipid levels present in the majority of cases  
13 with communicable HD reflects the dramatic changes to lipid metabolism observed in infection  
14 and is therefore, anticipated. We acknowledge that atherogenic LDLC is also low in this setting  
15 and that low HDLC may not be indicative of particularly increased disease risk, at least in the  
16 short-term. However, we still deem this as highly clinically relevant given that low HDLC is  
17 associated with a higher risk of atherosclerotic forms of HD, even at very low LDLC levels[22].  
18 Interestingly triglyceride levels were not significantly increased in those with communicable  
19 forms of HD, despite evidence that it can increase as part of the infectious/inflammatory  
20 metabolic milieu[12].  
21

22  
23 Our interest in this phenomenon predominantly relates to the longer-term effects of low  
24 HDLC, especially when observed together with the amplified vascular risk associated with  
25 chronic infection[12]. In Africa, where acute coronary syndromes are seen in a relatively young  
26 population[23], we predict the very high rates of myriad communicable disease[24, 25] will result  
27 in more complex cases, with potentially poorer outcomes in the long-term, given the critical role  
28 of HDLC in both innate and adaptive immunity[12]. While many infectious diseases (bacterial  
29 and viral) have contributed to the underlying pathology of HD reported here[5], dyslipidemia  
30 associated with HIV infection has been particularly well studied. HIV-related low HDLC is likely a  
31 consequence of both the viral infection and an adverse effect of some anti-retroviral treatment  
32 regimens[25, 26, 27, 28], however only 39 patients of the 76 (51%) confirmed HIV-positive were  
33  
34  
35  
36  
37  
38  
39  
40  
41  
42  
43  
44  
45  
46  
47  
48  
49  
50  
51  
52  
53  
54  
55  
56  
57  
58  
59  
60

1 on ART at time of presentation, representing 3% of entire subset sample, which possibly dilutes  
2 this effect.  
3

4 Our CRP subset analysis found associations between low HDLC and the pro-  
5 inflammatory marker CRP in patients with newly diagnosed HD in a sex disparate manner, with  
6 a much stronger positive association in females. Median CRP levels were also very high across  
7 all categories of HD aetiology, and are much higher than previous reports in both early analyses  
8 of large cohorts[18] as well as South African studies[29], but reflect the clinical requirements at  
9 presentation. These high levels may also be the result of 'multi-morbidity' observed in the  
10 cohort, given the prevalence of infectious disease (such as HIV/AIDS) as well as other lifestyle  
11 factors that can also influence CRP levels[30]; all of which may have contributed to the high  
12 levels observed. Inflammatory stress may be having a more adverse effect on HDLC in women  
13 compared to men as a result of many causes. The prognostic value of stratifying CVD risk, even  
14 at very high CRP (>10 mg/L) levels, has been demonstrated in a very large female cohort[18],  
15 and there are reports of elevated CRP in female populations of African descent[31]. We also  
16 report females as having a significantly higher BMI; obesity itself can induce a low-grade  
17 inflammatory response, however the association between low HDLC and CRP in women  
18 remained even after adjusting for BMI. While we have assumed that the exaggerated drop in  
19 HDLC in women with acute forms of communicable HD is a consequence rather than a cause of  
20 infection, treatment of atherogenic dyslipidaemia and inflammatory markers in women are of  
21 particular clinical relevance in a setting where obesity and its antecedent behaviours are  
22 increasing.  
23  
24  
25  
26  
27  
28  
29  
30  
31  
32  
33  
34  
35  
36  
37  
38  
39  
40  
41  
42  
43  
44

45 These results underscore the need to consider multifactorial CVD risk burden that  
46 recognises that co-occurrence of infectious and non-communicable disease produces significant  
47 and complex health disparities. Certainly, the clinical strategies to protect the heart and vessels  
48 in acute infection differ from those required in chronic infection and it is unlikely that lipid  
49 measurements will form a cornerstone of treatment in such cases. However, it is important to  
50 recognise the benefits of early detection and treatment of dyslipidaemia in order to mitigate any  
51 double effect of infectious *and* 'lifestyle' HD risk factors in the longer term. While the  
52  
53  
54  
55  
56  
57  
58  
59  
60

1 epidemiological evidence is clear, the precise mechanism by which HDLC decreases  
2 atherosclerotic CVD risk remains unclear[11]; indeed, efforts to develop pharmacological  
3 modalities to specifically increase HDLC levels to reduce cardiovascular risk, continues to be  
4 problematic[10] and we acknowledge that addressing the low HDLC observed in this cohort, in  
5 isolation, without commensurate improvements in HDLC functionality, will prove a difficult task.  
6  
7 This does not, however, preclude use of other therapeutic interventions that address the  
8 greater, more complex risk presentation of cases that fall in the 'crossover' between  
9 communicable and non-communicable diseases. For example, the polypill, which includes lipid-  
10 lowering medications, has been proposed as a viable treatment option in secondary prevention,  
11 given its relative ease of use and efficacy in low-income settings[32]. More so, evidence that  
12 statins also exert immunomodulatory effects, along with suggestions they may prove useful in  
13 the treatment and prevention of infections[33], indicate they may have important, multi-faceted  
14 clinical implications in populations such as Soweto, especially given the substantial  
15 dyslipidaemic risk associated with highly-prevalent HIV infection and ART. Attempts to address  
16 prevention, management, cure and control of non-communicable and communicable forms of  
17 HD as entirely separate entities are likely to prove insufficient. This holds true on a per-patient  
18 basis as well as for any population-wide, public health approaches.

19  
20  
21  
22  
23  
24  
25  
26  
27  
28  
29  
30  
31  
32  
33  
34  
35  
36  
37  
38  
39  
40  
41  
42  
43  
44  
45  
46  
47  
48  
49  
50  
51  
52  
53  
54  
55  
56  
57  
58  
59  
60  
There are a number of limitations that require consideration. Clinical data (other than routine echocardiography and 12-lead ECG) were obtained according to presentation. This study was not specifically designed to comprehensively delineate between specific forms of HD (resulting in variable clinical data) although this is part of clinical investigation at Baragwanath Hospital; although it should be noted HIV status is not routinely determined. The arbitrary selection of disease states into the communicable versus non-communicable groups (e.g. primary valve disease) may be questioned; hence our further delineation of clearly identifiable cases of acute inflammation/infection at the point of admission. However, we would emphasise that classification was prospectively applied, the groupings are consistent with our previous reports that describe in detail the rigorous clinical criteria employed in profiling the 'Heart of Soweto' cohort, and expected gradients in lipid levels were subsequently found. Systematic bias



1 needs to be carefully considered before attributing broad patterns in lipid profiles, as those with  
2 suspected atherosclerotic disease were more likely to have had lipid levels measured, reflecting  
3 the low number of those presenting an acute infectious form of HD (for example, patients with  
4 pericarditis). Adiposity, a major confounder of both dyslipidaemia and HD, was recorded in 71%  
5 of the cohort. However, its inclusion in the regression analyses did not alter the significance of  
6 the associations. Central obesity measurements (e.g. waist-to-hip ratio) may have offered  
7 greater delineation of CVD risk but data were not available. CRP was measured in just under  
8 one third of cases and related data requires careful interpretation. Finally, we were not able to  
9 investigate the possible effect of the magnitude and timing of the contributing infection on lipid  
10 levels, beyond the data collected at admission. Given the transient, dynamic processes of lipid  
11 metabolism over the course of acute and chronic diseases, only longitudinal studies of lipid  
12 levels and subsequent outcomes can fully elucidate the clinical importance of our findings.  
13  
14  
15  
16  
17  
18  
19  
20  
21  
22  
23  
24  
25

## 26 **Conclusions**

27  
28 We have shown that despite largely favourable lipid profiles, there are clear differences  
29 according to underlying aetiology of HD in urban Africans. Younger Africans with communicable  
30 HD have particularly low levels of HDLC that, if maintained in the longer term, may leave them  
31 at increased risk of atherosclerotic disease. If proven, targeted prevention programs that identify  
32 and actively manage individuals with a history of CD (particularly an active case) and with low  
33 levels of HDLC may be indicated. The alternative is an increasing burden of non-communicable  
34 forms of HD in urban African communities that is supplemented (in origin and confluence) by  
35 historical cases of communicable disease that have adversely affected protective HDLC levels  
36 (particularly in women).  
37  
38  
39  
40  
41  
42  
43  
44  
45  
46  
47  
48  
49  
50  
51  
52  
53  
54  
55  
56  
57  
58  
59  
60

## Acknowledgements

We thank all the doctors, nurses, and patients who participated in the registry; and Elisabeth Tshele, Bridget Phooko, Maureen Kubheka and Phutuma Mathusi who contributed to the meticulous collection and management of clinical data.

## Competing interests

All authors declare: all authors had financial support from independent funding bodies, including University of the Witwatersrand and unconditional research grants from Adcock-Ingram, the Medtronic Foundation USA, Servier, Bayer-Schering and BHP Billiton, for the submitted work; no financial relationships with any organisations that might have an interest in the submitted work in the previous 3 years; no other relationships or activities that could appear to have influenced the submitted work.

## Funding

The 'Heart of Soweto Study' registry was supported by the University of the Witwatersrand and unconditional research grants from Adcock-Ingram, the Medtronic Foundation USA, Servier, Bayer-Schering and BHP Billiton. SS, MJC and JGL are supported by the National Health & Medical Research Council of Australia [Program Grants 320860 and 631947 and Postgraduate scholarship 586739]. JGL is supported by the National Heart Foundation of Australia and Cardiac Society of Australia and New Zealand. Baker IDI is supported by the Victorian Government's Operational Infrastructure Support Program. KS and SL are supported by the MRC South Africa and the University of Cape Town.

## Author's contributions:

KS, MJC and SS participated in the original design of the study and supervised the collection of data. JGL prepared the first draft of the manuscript, with edits and revisions provided by all authors. FR and FT revised manuscript critically for important intellectual content. All authors

1 had full access to all the data and read and approved the final version of the manuscript. All  
2 authors had final responsibility for the decision to submit the manuscript for publication.  
3  
4  
5

### 6 **Data sharing statement**

7  
8 Study data will be available on request from the corresponding author.  
9  
10  
11  
12  
13  
14  
15  
16  
17  
18  
19  
20  
21  
22  
23  
24  
25  
26  
27  
28  
29  
30  
31  
32  
33  
34  
35  
36  
37  
38  
39  
40  
41  
42  
43  
44  
45  
46  
47  
48  
49  
50  
51  
52  
53  
54  
55  
56  
57  
58  
59  
60

For peer review only

## REFERENCES:

- 1 Yusuf S, Reddy S, Ounpuu S, et al. Global burden of cardiovascular diseases: Part II: variations in cardiovascular disease by specific ethnic groups and geographic regions and prevention strategies. *Circulation* 2001;**104**:2855-64.
- 2 Vorster HH. The emergence of cardiovascular disease during urbanisation of Africans. *Public Health Nutr* 2002;**5**:239-43.
- 3 Mensah GA. Descriptive epidemiology of cardiovascular risk factors and diabetes in sub-Saharan Africa. *Progress in cardiovascular diseases* 2013;**56**:240-50.
- 4 Danaei G, Singh GM, Paciorek CJ, et al. The global cardiovascular risk transition: associations of four metabolic risk factors with national income, urbanization, and Western diet in 1980 and 2008. *Circulation* 2013;**127**:1493-502, 502e1-8.
- 5 Mocumbi AO, Sliwa K. Women's cardiovascular health in Africa. *Heart* 2012;**98**:450-5.
- 6 Thienemann F, Sliwa K, Rockstroh JK. HIV and the heart: the impact of antiretroviral therapy: a global perspective. *Eur Heart J* 2013;**34**:3538-46.
- 7 Sliwa K, Carrington MJ, Becker A, et al. Contribution of the human immunodeficiency virus/acquired immunodeficiency syndrome epidemic to de novo presentations of heart disease in the Heart of Soweto Study cohort. *Eur Heart J* 2012;**33**:866-74.
- 8 Stewart S, Carrington M, Pretorius S, et al. Standing at the crossroads between new and historically prevalent heart disease: effects of migration and socio-economic factors in the Heart of Soweto cohort study. *Eur Heart J* 2011;**32**:492-9.
- 9 Chapman MJ, Ginsberg HN, Amarenco P, et al. Triglyceride-rich lipoproteins and high-density lipoprotein cholesterol in patients at high risk of cardiovascular disease: evidence and guidance for management. *Eur Heart J* 2011;**32**:1345-61.
- 10 Libby P, Ridker PM, Hansson GK. Progress and challenges in translating the biology of atherosclerosis. *Nature* 2011;**473**:317-25.
- 11 Voight BF, Peloso GM, Orho-Melander M, et al. Plasma HDL cholesterol and risk of myocardial infarction: a mendelian randomisation study. *Lancet* 2012;**380**:572-80.
- 12 Khovidhunkit W, Kim MS, Memon RA, et al. Effects of infection and inflammation on lipid and lipoprotein metabolism: mechanisms and consequences to the host. *J Lipid Res* 2004;**45**:1169-96.
- 13 Sliwa K, Lyons JG, Carrington MJ, et al. Different lipid profiles according to ethnicity in the Heart of Soweto study cohort of de novo presentations of heart disease. *Cardiovasc J Afr* 2012;**23**:389-95.
- 14 Khovidhunkit W, Memon RA, Feingold KR, et al. Infection and inflammation-induced proatherogenic changes of lipoproteins. *J Infect Dis* 2000;**181 Suppl 3**:S462-72.
- 15 Sliwa K, Wilkinson D, Hansen C, et al. Spectrum of heart disease and risk factors in a black urban population in South Africa (the Heart of Soweto Study): a cohort study. *Lancet* 2008;**371**:915-22.
- 16 Friedewald WT, Levy RI, Fredrickson DS. Estimation of the concentration of low-density lipoprotein cholesterol in plasma, without use of the preparative ultracentrifuge. *Clinical chemistry* 1972;**18**:499-502.
- 17 Klug E. South African dyslipidaemia guideline consensus statement. *S Afr Med J* 2012;**102**:178-87.
- 18 Ridker PM, Cook N. Clinical usefulness of very high and very low levels of C-reactive protein across the full range of Framingham Risk Scores. *Circulation* 2004;**109**:1955-9.
- 19 Dhingra R, Gona P, Nam BH, et al. C-reactive protein, inflammatory conditions, and cardiovascular disease risk. *Am J Med* 2007;**120**:1054-62.
- 20 Zoratti R. A review on ethnic differences in plasma triglycerides and high-density-lipoprotein cholesterol: is the lipid pattern the key factor for the low coronary heart disease rate in people of African origin? *Eur J Epidemiol* 1998;**14**:9-21.

- 1  
2  
3  
4  
5  
6  
7  
8  
9  
10  
11  
12  
13  
14  
15  
16  
17  
18  
19  
20  
21  
22  
23  
24  
25  
26  
27  
28  
29  
30  
31  
32  
33  
34  
35  
36  
37  
38  
39  
40  
41  
42  
43  
44  
45  
46  
47  
48  
49  
50  
51  
52  
53  
54  
55  
56  
57  
58  
59  
60
- 21 Ulasi, II, Ijoma CK, Onodugo OD. A community-based study of hypertension and cardio-metabolic syndrome in semi-urban and rural communities in Nigeria. *BMC Health Serv Res* 2010;**10**:71.
- 22 deGoma EM, Leeper NJ, Heidenreich PA. Clinical significance of high-density lipoprotein cholesterol in patients with low low-density lipoprotein cholesterol. *Journal of the American College of Cardiology* 2008;**51**:49-55.
- 23 Steyn K, Sliwa K, Hawken S, et al. Risk factors associated with myocardial infarction in Africa: the INTERHEART Africa study. *Circulation* 2005;**112**:3554-61.
- 24 Tollman SM, Kahn K, Sartorius B, et al. Implications of mortality transition for primary health care in rural South Africa: a population-based surveillance study. *Lancet* 2008;**372**:893-901.
- 25 Adewole OO, Eze S, Betiku Y, et al. Lipid profile in HIV/AIDS patients in Nigeria. *Afr Health Sci* 2010;**10**:144-9.
- 26 Anastos K, Ndamage F, Lu D, et al. Lipoprotein levels and cardiovascular risk in HIV-infected and uninfected Rwandan women. *AIDS Res Ther* 2010;**7**:34.
- 27 Armstrong C, Liu E, Okuma J, et al. Dyslipidemia in an HIV-positive antiretroviral treatment-naïve population in Dar es Salaam, Tanzania. *J Acquir Immune Defic Syndr* 2011;**57**:141-5.
- 28 Buchacz K, Weidle PJ, Moore D, et al. Changes in lipid profile over 24 months among adults on first-line highly active antiretroviral therapy in the home-based AIDS care program in rural Uganda. *J Acquir Immune Defic Syndr* 2008;**47**:304-11.
- 29 Ntyintyane L, Panz V, Raal FJ, et al. Leptin, adiponectin, and high-sensitivity C-reactive protein in relation to the metabolic syndrome in urban South African blacks with and without coronary artery disease. *Metab Syndr Relat Disord* 2009;**7**:243-8.
- 30 Nordestgaard BG. Does elevated C-reactive protein cause human atherothrombosis? Novel insights from genetics, intervention trials, and elsewhere. *Curr Opin Lipidol* 2009;**20**:393-401.
- 31 Albert MA, Glynn RJ, Buring J, et al. C-reactive protein levels among women of various ethnic groups living in the United States (from the Women's Health Study). *Am J Cardiol* 2004;**93**:1238-42.
- 32 Yusuf S, Islam S, Chow CK, et al. Use of secondary prevention drugs for cardiovascular disease in the community in high-income, middle-income, and low-income countries (the PURE Study): a prospective epidemiological survey. *Lancet* 2011.
- 33 Tleyjeh IM, Kashour T, Hakim FA, et al. Statins for the prevention and treatment of infections: a systematic review and meta-analysis. *Arch Intern Med* 2009;**169**:1658-67.

TABLE 1 Clinical and demographic profile according to heart disease aetiology

|                                                     | ALL<br>Cases<br>n=1199 | Non-communicable<br>n=678 | Communicable<br>n=521 | P<br>value |
|-----------------------------------------------------|------------------------|---------------------------|-----------------------|------------|
| <b>Demographic Profile</b>                          |                        |                           |                       |            |
| Mean age (years)                                    | 58.3 ±14.0             | 60.1 ± 13.1               | 55.9 ± 14.9           | <0.001     |
| Female                                              | 701 (59%)              | 403 (59%)                 | 298 (57%)             | 0.44       |
| <6 years formal education                           | 582 (49%)              | 335 (49%)                 | 247 (47%)             | 0.52       |
| Soweto origin                                       | 562 (47%)              | 327 (48%)                 | 235 (45%)             | 0.29       |
| <b>Clinical Presentation</b>                        |                        |                           |                       |            |
| Total cholesterol (mmol/L)                          | 4.0 ± 1.4              | 4.3 ± 1.3                 | 3.7 ± 1.2             | <0.001     |
| HDLC (mmol/L)                                       | 1.1 ± 0.5              | 1.2 ± 0.5                 | 1.0 ± 0.5             | <0.001     |
| Median triglycerides (mmol/L)*                      | 1.1 (0.8, 1.5)         | 1.1 (0.8,1.6)             | 1.0 (0.7, 1.3)        | <0.001     |
| LDLC (mmol/L)                                       | 2.4 ± 1.0              | 2.5 ± 1.0                 | 2.2 ± 0.9             | <0.001     |
| TC:HDLC ratio                                       | 4.3 ± 3.0              | 4.2 ± 3.1                 | 4.4 ± 2.7             | 0.27       |
| Median serum CRP (mg/L)*                            | 19 (7.0, 45.0)         | 16.8 (6.6,41.5)           | 20.5 (7.8, 55.9)      | 0.25       |
| Systolic BP (mmHg)                                  | 135 ± 29               | 143 ± 29                  | 126 ± 26              | <0.001     |
| Diastolic BP (mmHg)                                 | 78 ± 16                | 80 ± 16                   | 74 ± 16               | <0.001     |
| BMI (kg/m <sup>2</sup> )                            | 29.0 ± 6.7             | 30.3 ± 6.7                | 27.2 ± 6.2            | <0.001     |
| <b>Prevalence of dyslipidaemia (n, %)</b>           |                        |                           |                       |            |
| High total cholesterol (> 5mmol/L)                  | 378 (32%)              | 266 (39%)                 | 112 (22%)             | <0.001     |
| Low HDLC (< 1 in males and < 1.2 mmol/L in females) | 694 (58%)              | 344 (51%)                 | 350 (67%)             | <0.001     |
| High LDLC (> 2.5 mmol/L)                            | 446 (37%)              | 291 (43%)                 | 155 (30%)             | <0.001     |

|                                                |           |           |           |        |
|------------------------------------------------|-----------|-----------|-----------|--------|
| High triglycerides (> 1.7 mmol/l)              | 215 (18%) | 143 (21%) | 72 (14%)  | 0.001  |
| <b>Prevalence of other risk factors (n, %)</b> |           |           |           |        |
| Obese (BMI >30 kg/m <sup>2</sup> )             | 344 (40%) | 237 (48%) | 107 (30%) | <0.001 |
| Type 2 diabetes                                | 98 (8%)   | 71 (11%)  | 27 (5%)   | <0.001 |
| Past or current smoker                         | 566 (47%) | 321(47%)  | 245 (47%) | 0.95   |
| Family history of CVD                          | 466 (39%) | 286 (42%) | 180 (35%) | 0.01   |
| Confirmed HIV-positive cases                   | 76 (6%)   | 15 (2%)   | 61 (12%)  | <0.001 |

Table legend:

LDLC = low-density lipoprotein cholesterol; HDLC = high-density lipoprotein cholesterol; BMI = body mass index (available in 854 cases); CRP = C-reactive protein (available in 367 cases); CVD = cardiovascular disease; HIV = human immunodeficiency virus. \*Median (interquartile range) values presented, differences tested by Mann-Whitney U test

**TABLE 2** Independent correlates of communicable heart disease, relative to non-communicable heart disease

|                                          | Communicable disease |               |
|------------------------------------------|----------------------|---------------|
|                                          | Odds Ratio           | 95% CI        |
| <b>Female sex</b>                        | 0.91                 | 0.72, 1.15    |
| <b>Age</b>                               | 0.98                 | 0.97, 0.99**  |
| <b>Obesity</b>                           | 0.50                 | 0.37, 0.68*** |
| <b>&lt; 6 years formal education</b>     | 1.11                 | 0.88, 1.42    |
| <b>Soweto origin</b>                     | 0.98                 | 0.77, 1.24    |
| <b>Body mass index adjusted analysis</b> |                      |               |
| <b>High TC</b>                           | 0.52                 | 0.37, 0.71*** |
| <b>High LDLC</b>                         | 0.56                 | 0.41, 0.76*** |
| <b>Low HDLC</b>                          | 1.91                 | 1.42, 2.57*** |
| <b>High TG</b>                           | 0.65                 | 0.51, 0.84*   |

Table legend:

Obesity BMI >30kg/m<sup>2</sup>; High total cholesterol (TC) > 4.5 mmol/L; High low density lipoprotein (LDLC) >2.5 mmol/L; Low high density lipoprotein (HDLC) (<1.0 mmol/L in males, <1.2 mmol/L in females). OR = odds ratio; CI = confidence intervals. Age and sex-adjusted analysis: \* p<0.05; \*\*p<0.01; \*\*\*p<0.001.



**FIGURE 1 Sex specific lipid profiles according to heart disease aetiology**Figure legend:

Lipid values are shown as mean  $\pm$  standard error. P values indicate between-sex comparisons per aetiology group (T-test), \*\* =  $P < 0.01$ ; \* =  $P < 0.05$ . NCD = non-communicable heart disease; CD = communicable heart disease; TC= total cholesterol; HDL= high-density lipoprotein cholesterol; LDL= low-density lipoprotein. Y-axis dotted lines show thresholds for high TC and LDL or low HDL (sex specific values).

1 **FIGURE 2** Prevalence of low high-density lipoprotein cholesterol according to heart  
2  
3 **disease aetiology**  
4

5  
6  
7  
8 Figure legend:  
9

10 NCD = non-communicable heart disease; CD = communicable heart disease.

11 High total cholesterol (TC) > 4.5 mmol/L; Low high-density lipoprotein cholesterol (HDLC) (<1.0  
12 mmol/L in males, <1.2 mmol/L in females). High low density lipoprotein cholesterol (LDLC) >2.5  
13 mmol/L; High triglycerides (TGs) >1.7 mmol/L  
14  
15  
16  
17  
18  
19  
20  
21  
22  
23  
24  
25  
26  
27  
28  
29  
30  
31  
32  
33  
34  
35  
36  
37  
38  
39  
40  
41  
42  
43  
44  
45  
46  
47  
48  
49  
50  
51  
52  
53  
54  
55  
56  
57  
58  
59  
60

**FIGURE 3 Risk of low high-density lipoprotein cholesterol according to C-reactive protein risk group, relative to low-risk C-reactive protein group (n=367)**

Figure legend:

Age-adjusted analysis. CRP = C-reactive protein. \*\* =  $P < 0.01$ ; \* =  $P < 0.05$  relative to low CRP group. For confidence intervals, please refer to Results section.

For peer review only

1  
2  
3  
4  
5  
6  
7  
8  
9  
10  
11  
12  
13  
14  
15  
16  
17  
18  
19  
20  
21  
22  
23  
24  
25  
26  
27  
28  
29  
30  
31  
32  
33  
34  
35  
36  
37  
38  
39  
40  
41  
42  
43  
44  
45  
46  
47  
48  
49  
50  
51  
52  
53  
54  
55  
56  
57  
58  
59  
60

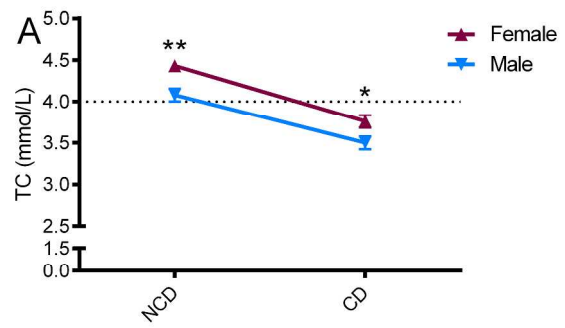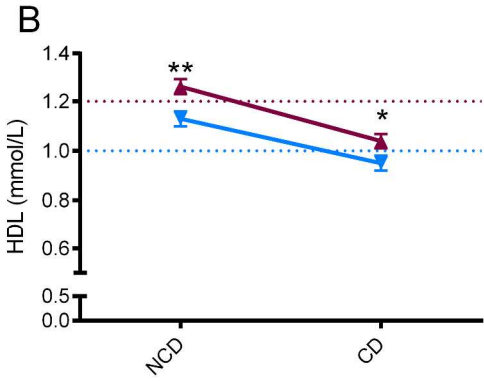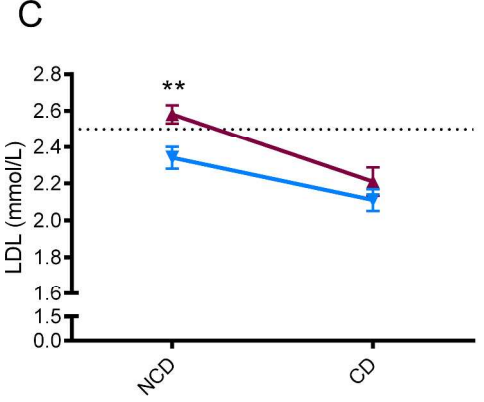

234x447mm (300 x 300 DPI)

1  
2  
3  
4  
5  
6  
7  
8  
9  
10  
11  
12  
13  
14  
15  
16  
17  
18  
19  
20  
21  
22  
23  
24  
25  
26  
27  
28  
29  
30  
31  
32  
33  
34  
35  
36  
37  
38  
39  
40  
41  
42  
43  
44  
45  
46  
47  
48  
49  
50  
51  
52  
53  
54  
55  
56  
57  
58  
59  
60

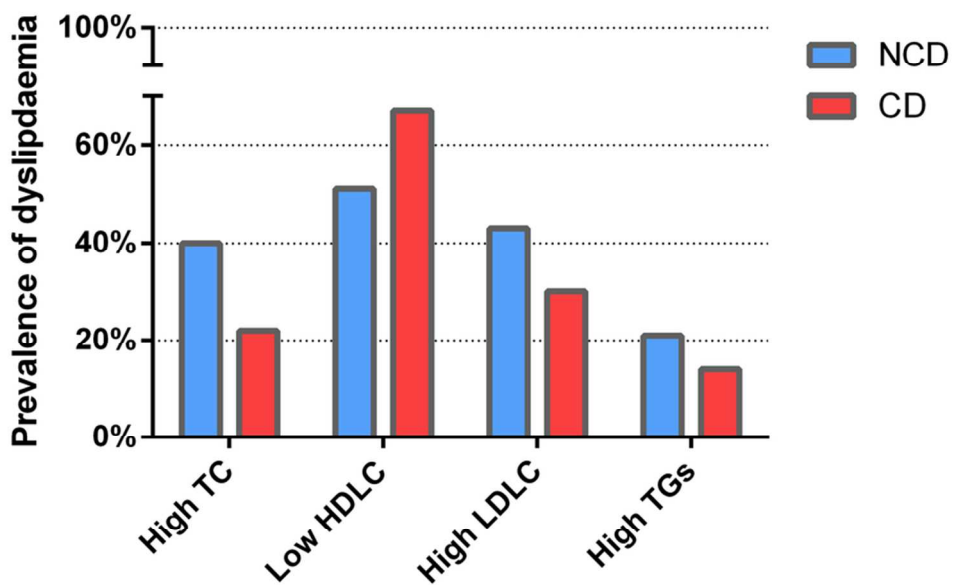

80x52mm (300 x 300 DPI)

Review only

1  
2  
3  
4  
5  
6  
7  
8  
9  
10  
11  
12  
13  
14  
15  
16  
17  
18  
19  
20  
21  
22  
23  
24  
25  
26  
27  
28  
29  
30  
31  
32  
33  
34  
35  
36  
37  
38  
39  
40  
41  
42  
43  
44  
45  
46  
47  
48  
49  
50  
51  
52  
53  
54  
55  
56  
57  
58  
59  
60

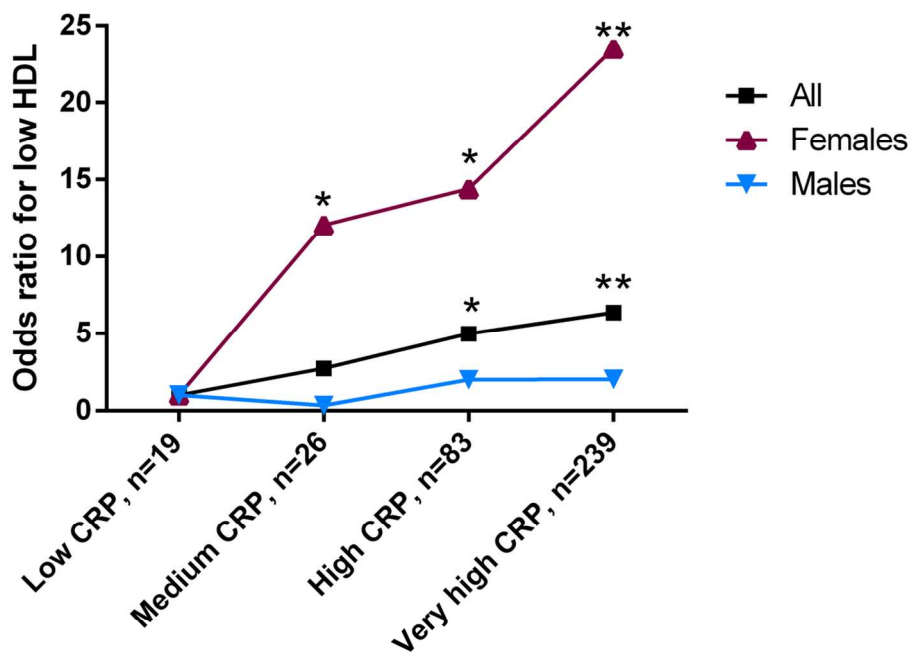

117x90mm (300 x 300 DPI)

Review only

STROBE Statement—Checklist of items that should be included in reports of *cross-sectional studies*

Completed for the article: *Low levels of high-density lipoprotein cholesterol is the most prevalent metabolic abnormality in urban Africans with newly diagnosed heart disease: The ‘Heart of Soweto’ hospital registry study*

Date: 12 February 2014

|                              | Item No | Recommendation                                                                                                                                                                                    | Complete                 |
|------------------------------|---------|---------------------------------------------------------------------------------------------------------------------------------------------------------------------------------------------------|--------------------------|
| <b>Title and abstract</b>    | 1       | (a) Indicate the study’s design with a commonly used term in the title or the abstract                                                                                                            | <input type="checkbox"/> |
|                              |         | (b) Provide in the abstract an informative and balanced summary of what was done and what was found                                                                                               | <input type="checkbox"/> |
| <b>Introduction</b>          |         |                                                                                                                                                                                                   |                          |
| Background/rationale         | 2       | Explain the scientific background and rationale for the investigation being reported                                                                                                              | <input type="checkbox"/> |
| Objectives                   | 3       | State specific objectives, including any prespecified hypotheses                                                                                                                                  | <input type="checkbox"/> |
| <b>Methods</b>               |         |                                                                                                                                                                                                   |                          |
| Study design                 | 4       | Present key elements of study design early in the paper                                                                                                                                           | <input type="checkbox"/> |
| Setting                      | 5       | Describe the setting, locations, and relevant dates, including periods of recruitment, exposure, follow-up, and data collection                                                                   | <input type="checkbox"/> |
| Participants                 | 6       | (a) Give the eligibility criteria, and the sources and methods of selection of participants                                                                                                       | <input type="checkbox"/> |
| Variables                    | 7       | Clearly define all outcomes, exposures, predictors, potential confounders, and effect modifiers. Give diagnostic criteria, if applicable                                                          | <input type="checkbox"/> |
| Data sources/<br>measurement | 8*      | For each variable of interest, give sources of data and details of methods of assessment (measurement). Describe comparability of assessment methods if there is more than one group              | <input type="checkbox"/> |
| Bias                         | 9       | Describe any efforts to address potential sources of bias                                                                                                                                         | <input type="checkbox"/> |
| Study size                   | 10      | Explain how the study size was arrived at                                                                                                                                                         | <input type="checkbox"/> |
| Quantitative variables       | 11      | Explain how quantitative variables were handled in the analyses. If applicable, describe which groupings were chosen and why                                                                      | <input type="checkbox"/> |
| Statistical methods          | 12      | (a) Describe all statistical methods, including those used to control for confounding                                                                                                             | <input type="checkbox"/> |
|                              |         | (b) Describe any methods used to examine subgroups and interactions                                                                                                                               | <input type="checkbox"/> |
|                              |         | (c) Explain how missing data were addressed                                                                                                                                                       | <input type="checkbox"/> |
|                              |         | (d) If applicable, describe analytical methods taking account of sampling strategy                                                                                                                | <input type="checkbox"/> |
|                              |         | (e) Describe any sensitivity analyses                                                                                                                                                             | N/A                      |
| <b>Results</b>               |         |                                                                                                                                                                                                   |                          |
| Participants                 | 13*     | (a) Report numbers of individuals at each stage of study—eg numbers potentially eligible, examined for eligibility, confirmed eligible, included in the study, completing follow-up, and analysed | <input type="checkbox"/> |
|                              |         | (b) Give reasons for non-participation at each stage                                                                                                                                              | <input type="checkbox"/> |
|                              |         | (c) Consider use of a flow diagram                                                                                                                                                                | N/A                      |
| Descriptive data             | 14*     | (a) Give characteristics of study participants (eg demographic, clinical, social) and information on exposures and potential confounders                                                          | <input type="checkbox"/> |

|                          |     |                                                                                                                                                                                                              |     |
|--------------------------|-----|--------------------------------------------------------------------------------------------------------------------------------------------------------------------------------------------------------------|-----|
|                          |     | (b) Indicate number of participants with missing data for each variable of interest                                                                                                                          | □   |
| Outcome data             | 15* | Report numbers of outcome events or summary measures                                                                                                                                                         | □   |
| Main results             | 16  | (a) Give unadjusted estimates and, if applicable, confounder-adjusted estimates and their precision (eg, 95% confidence interval). Make clear which confounders were adjusted for and why they were included | □   |
|                          |     | (b) Report category boundaries when continuous variables were categorized                                                                                                                                    | N/A |
|                          |     | (c) If relevant, consider translating estimates of relative risk into absolute risk for a meaningful time period                                                                                             | N/A |
| Other analyses           | 17  | Report other analyses done—eg analyses of subgroups and interactions, and sensitivity analyses                                                                                                               | □   |
| <b>Discussion</b>        |     |                                                                                                                                                                                                              |     |
| Key results              | 18  | Summarise key results with reference to study objectives                                                                                                                                                     | □   |
| Limitations              | 19  | Discuss limitations of the study, taking into account sources of potential bias or imprecision. Discuss both direction and magnitude of any potential bias                                                   | □   |
| Interpretation           | 20  | Give a cautious overall interpretation of results considering objectives, limitations, multiplicity of analyses, results from similar studies, and other relevant evidence                                   | □   |
| Generalisability         | 21  | Discuss the generalisability (external validity) of the study results                                                                                                                                        | □   |
| <b>Other information</b> |     |                                                                                                                                                                                                              |     |
| Funding                  | 22  | Give the source of funding and the role of the funders for the present study and, if applicable, for the original study on which the present article is based                                                | □   |

\*Give information separately for exposed and unexposed groups.



# BMJ Open

## Lower Levels of High-density Lipoprotein Cholesterol in Urban Africans Presenting with Communicable Versus Non-communicable Forms of Heart Disease: The 'Heart of Soweto' hospital registry study

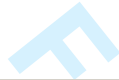

|                                 |                                                                                                                                                                                                                                                                                                                                                                                                                                                                                                                                                                                                                                                                                                                                                                                                                                                                                                          |
|---------------------------------|----------------------------------------------------------------------------------------------------------------------------------------------------------------------------------------------------------------------------------------------------------------------------------------------------------------------------------------------------------------------------------------------------------------------------------------------------------------------------------------------------------------------------------------------------------------------------------------------------------------------------------------------------------------------------------------------------------------------------------------------------------------------------------------------------------------------------------------------------------------------------------------------------------|
| Journal:                        | <i>BMJ Open</i>                                                                                                                                                                                                                                                                                                                                                                                                                                                                                                                                                                                                                                                                                                                                                                                                                                                                                          |
| Manuscript ID:                  | bmjopen-2014-005069.R1                                                                                                                                                                                                                                                                                                                                                                                                                                                                                                                                                                                                                                                                                                                                                                                                                                                                                   |
| Article Type:                   | Research                                                                                                                                                                                                                                                                                                                                                                                                                                                                                                                                                                                                                                                                                                                                                                                                                                                                                                 |
| Date Submitted by the Author:   | 17-May-2014                                                                                                                                                                                                                                                                                                                                                                                                                                                                                                                                                                                                                                                                                                                                                                                                                                                                                              |
| Complete List of Authors:       | Lyons, Jasmine; Baker IDI Heart and Diabetes Institute, Preventative Health<br>Sliwa, Karen; University of the Witwatersrand, Soweto Cardiovascular Research Unit<br>Carrington, Melinda; Baker IDI Heart and Diabetes Institute, Preventative Health; University of the Witwatersrand, Soweto Cardiovascular Research Unit<br>Raal, Frederick; University of the Witwatersrand, Carbohydrate and Lipid Metabolism Research Unit<br>Pretorius, Sandra; University of the Witwatersrand, Soweto Cardiovascular Research Unit<br>Thienemann, Freidrich; University of Cape Town, Institute of Infectious Diseases and Molecular Medicine; University of Cape Town, Hatter Institute for Cardiovascular Research in Africa, Cape Heart Group and IIDMM<br>STEWART, SIMON; Baker IDI Heart and Diabetes Institute, Preventative Health; University of the Witwatersrand, Soweto Cardiovascular Research Unit |
| <b>Primary Subject Heading</b>: | Cardiovascular medicine                                                                                                                                                                                                                                                                                                                                                                                                                                                                                                                                                                                                                                                                                                                                                                                                                                                                                  |
| Secondary Subject Heading:      | Public health                                                                                                                                                                                                                                                                                                                                                                                                                                                                                                                                                                                                                                                                                                                                                                                                                                                                                            |
| Keywords:                       | Cardiac Epidemiology < CARDIOLOGY, Epidemiology < INFECTIOUS DISEASES, PREVENTIVE MEDICINE                                                                                                                                                                                                                                                                                                                                                                                                                                                                                                                                                                                                                                                                                                                                                                                                               |
|                                 |                                                                                                                                                                                                                                                                                                                                                                                                                                                                                                                                                                                                                                                                                                                                                                                                                                                                                                          |

SCHOLARONE™  
Manuscripts

1  
2  
3 **Lower Levels of High-density Lipoprotein Cholesterol in Urban Africans**  
4  
5 **Presenting with Communicable Versus Non-communicable Forms of Heart**  
6  
7 **Disease: The 'Heart of Soweto' hospital registry study**  
8  
9

10  
11  
12 **Short title:** Lyons – HDLC in communicable heart disease  
13

14  
15  
16  
17 **Authors:** Jasmine G. Lyons (1, 2)  
18 Karen Sliwa (3, 4)  
19 Melinda J. Carrington (1, 4, 5)  
20 Frederick Raal (7)  
21 Sandra Pretorius (3)  
22 Friedrich Thienemann (3, 6, 8)  
23 Simon Stewart (1, 3, 4, 5)  
24  
25  
26  
27  
28  
29

30 **Affiliations:**

- 31  
32 (1) Baker IDI Heart and Diabetes Institute, Melbourne, Australia  
33 (2) Division of Health Sciences, University of South Australia, Adelaide, Australia  
34 (3) Hatter Institute for Cardiovascular Research in Africa, Cape Heart Group and IIDMM,  
35 University of Cape Town, Cape Town, South Africa  
36  
37 (4) Soweto Cardiovascular Research Unit, University of the Witwatersrand, Johannesburg,  
38 South Africa  
39  
40 (5) Department of Epidemiology and Preventative Medicine, Monash University, Melbourne,  
41 Australia  
42  
43 (6) Institute of Infectious Diseases and Molecular Medicine, University of Cape Town, South  
44 Africa  
45  
46 (7) Carbohydrate and Lipid Metabolism Research unit, University of the Witwatersrand,  
47 Johannesburg, South Africa  
48  
49 (8) Infectious Diseases Referral Clinic, GF Jooste Hospital, Manenberg, South Africa  
50  
51  
52

53  
54  
55 **Address for Correspondence:** Professor Simon Stewart, Preventative Health, Baker IDI Heart  
56 and Diabetes Institute, PO Box 6492, St Kilda Rd Central, Melbourne, Victoria, 8008, Australia  
57  
58 E-mail: [simon.stewart@bakeridi.edu.au](mailto:simon.stewart@bakeridi.edu.au)  
59  
60

Telephone: +61 3 8532 1640

Fax: +61 3 8532 1100

1  
2  
3  
4 **Key Words:** High-density lipoprotein, lipids, infection, epidemiologic transition, Africa.  
5  
6  
7

8 **Word count:** 3540 not including 2 tables, 3 figures and 35 references.  
9  
10  
11  
12  
13  
14  
15  
16  
17  
18  
19  
20  
21  
22  
23  
24  
25  
26  
27  
28  
29  
30  
31  
32  
33  
34  
35  
36  
37  
38  
39  
40  
41  
42  
43  
44  
45  
46  
47  
48  
49  
50  
51  
52  
53  
54  
55  
56  
57  
58  
59  
60

For peer review only

**ABSTRACT**

**Objectives:** To investigate if urban Africans displayed lower levels of atheroprotective high-density lipoprotein cholesterol (HDLC) when presenting with communicable versus non-communicable forms of heart disease (HD) as both acute infection and chronic inflammation reduce HDLC levels.

**Design:** Hospital registry of 5328 de novo cases of HD over a 3-year period.

**Setting:** Cardiology Unit, Baragwanath Hospital in Soweto, South Africa.

**Participants:** A total of 1199 patients of African descent (59% female; 57.0±13.4 years) had fasting blood lipid levels (Total cholesterol [TC], triglyceride, HDLC, and low-density lipoprotein [LDLC] cholesterol) documented on admission. Serum inflammatory marker C-reactive protein (CRP) was measured in a sub-set of 367 patients (31% of cases).

**Main outcome measures:** Lipid profiles were compared according to pre-specified classification of non-communicable (e.g. hypertensive HD) versus communicable (e.g. rheumatic HD) HD. Low HDLC was defined as <1.0 mmol/L for males and <1.2mmol/L for females, according to applicable South African Clinical Guidelines.

**Results:** Overall 694 (58%) of those presenting with HD had low HDLC levels; 344 of 678 (51%) and 350 of 521 (67%) for non-communicable and communicable, respectively ( $p<0.001$ ). Comparatively, overall prevalence of high TC was 32% and high LDLC was 37%. On an adjusted basis, those with non-communicable HD were more likely to record a low HDLC relative to non-communicable presentations (OR 1.91, 95%CI 1.42, 2.57;  $p<0.001$ ). There was a strong relationship between low HDLC and higher levels of CRP, but only in females.

**Conclusions:** Despite largely favourable lipid profiles, there are clear differences according to aetiology of underlying HD in urban Africans, with younger patients with communicable HD having particularly low levels of HDLC. Appropriate prospective evidence is needed to determine if persistent low levels of HDLC expose patients to increased, long-term risk of atherosclerotic forms of HD. The female-only inverse association between HDL-C and CRP warrants further investigation.

## ARTICLE SUMMARY

### Article focus:

- In sub-Saharan Africa, the incidence of non-communicable cardiovascular disease is increasing while, simultaneously, communicable forms of heart disease continue to cause considerable levels of morbidity and mortality.
- In this study, we have sought to explore one heart disease risk factor, dyslipidaemia, in a well-defined clinical registry in Soweto, South Africa.
- Lipid profiles from 1199 de novo presentations of heart disease were compared according to pre-specified classification of non-communicable heart disease (e.g. hypertensive heart disease) versus communicable forms of heart disease (e.g. pericarditis or chronic rheumatic heart disease). We hypothesised that those diagnosed with communicable heart disease would display an adverse lipid profile, with low levels of atheroprotective high-density lipoprotein cholesterol (HDLC). We also investigated the potential interaction of the inflammatory marker C-reactive protein (CRP) and low HDLC in a subset of these patients.

### Key messages:

- We describe distinct patterns of dyslipidaemia according to underlying heart disease aetiology: significantly decreased levels of HDLC, total cholesterol and low-density lipoprotein cholesterol in those with communicable heart disease (representing 43% of cohort) compared to those with non-communicable heart disease (57% of cohort).
- In adjusted analyses, low HDLC was more pronounced in those with communicable heart disease. In those with high CRP levels, we present novel data showing a sex-disparate relationship between CRP and low HDLC, with a strong relationship between high CRP and low HDLC in females only.
- The high prevalence of low HDLC in a relatively young population of urban Africans may, if persistent in the longer-term, confer greater risk of atherosclerotic heart disease

### Strengths and limitations of the study:

- We report a high prevalence of low HDLC in *de novo* presentations of both communicable heart disease and non-communicable heart disease, with a greater prevalence in those with communicable heart disease.
- The study cohort is clinically very well defined; however the lipid data were obtained according to clinical presentation, which may impose systematic bias to the results.
- This hospital registry study has provided preliminary data that would support prospective investigation of longer-term dyslipidaemia patterns and their impact on heart disease incidence, both in South Africa and in other low-and-middle-income countries where the epidemiologic transition is currently underway.

## INTRODUCTION

1  
2  
3  
4  
5  
6  
7  
8  
9  
10  
11  
12  
13  
14  
15  
16  
17  
18  
19  
20  
21  
22  
23  
24  
25  
26  
27  
28  
29  
30  
31  
32  
33  
34  
35  
36  
37  
38  
39  
40  
41  
42  
43  
44  
45  
46  
47  
48  
49  
50  
51  
52  
53  
54  
55  
56  
57  
58  
59  
60

Heart diseases with infectious aetiology have long been the principal forms of cardiovascular disease (CVD) in Sub-Saharan Africa. However, epidemiological transition has seen increased prevalence of non-communicable forms of heart disease in these populations[1]. This phenomenon is largely driven by complex, population-wide changes in demographic, social and economic status, with associated changes in lifestyle habits[2-4]. Indicative of the tension between 'old' and 'new' forms of heart disease, the incidence of communicable heart disease (HD) is sustained by the devastating epidemics of human immunodeficiency virus/acquired immune deficiency syndrome (HIV/AIDS), tuberculosis (TB), rheumatic heart disease (RHD) and parasitic infections with cardiac involvement[5-7], while in parallel, the prevalence of risk factors for non-communicable HD increases[8].

Low serum levels of high-density lipoprotein cholesterol (HDLC) are consistently and independently associated with increased risk of atherosclerotic forms of CVD[9 10]. However, it remains uncertain whether low HDLC is causal or just a cardiovascular risk marker[11]. If we are to extrapolate from studies in Western and Asian populations[12-14], isolated low HDLC is associated with increased risk for CVD in the long-term. There are several causes of low HDLC levels, including overweight, obesity, tobacco smoking, and insulin resistance/type 2 diabetes mellitus, indicative of the important role lifestyle factors have in mediating HDLC levels[9]. Additionally, low HDLC is a striking consequence of abnormal lipid metabolism in infection and inflammation[15]. Although it has been shown that those of African descent largely show a favourable lipid profile characterised by high HDLC levels [16], it is unlikely that they can remain athero-protective during an infected state[15]. Indeed, in this setting, it is probable that increasing prevalence of modifiable/ lifestyle risk factors contribute to a more advanced presentation in those with communicable HD[8]. We have previously reported that in the geographically compact townships that comprise Soweto in South Africa, 'old' and 'new' forms of HD are simultaneously present[8]. While this tension exists, we have a unique opportunity to explore lipid profiles in patients presenting with non-communicable versus communicable forms of HD.

## STUDY HYPOTHESES

Having shown important ethnic differences in the lipid profiles of patients of African descent presenting with HD in the urban African enclave of Soweto[16], we hypothesised that independent of age and sex, urban Africans presenting with communicable HD will demonstrate patterns of dyslipidaemia associated with infection/inflammation, particularly sub-optimal levels of HDLC, versus non-communicable HD.

## METHODS

### Study Setting & Design

As described in detail previously[8 17] the 3,500 bed Chris Hani Baragwanath Hospital (case load of > 125,000 in-patients per annum) services the tertiary care needs of Soweto (population of 1.1 million) and surrounding communities. All suspected cardiac presentations are referred to the hospital's Cardiology Unit for advanced diagnostic testing and gold-standard treatments. A prospective clinical registry of all *de novo* presentations of the same was established in 2006 as part of the Heart of Soweto Study and represents sub-Saharan Africa's largest and most detailed study of advanced forms of HD to date[17].

### Participants

The 'Heart of Soweto' cohort of *de novo* case presentations comprised 5328 patients. Of these, 2185 patients (40%) had a documented fasting lipid profile (serum total cholesterol (TC) level, triglyceride, HDLC and calculated low-density lipoprotein cholesterol (LDLC)[18] undertaken at Baragwanath Hospital on-site pathology). None of the patients were on lipid lowering agents at the time of presentation, as this medication can only be prescribed at the tertiary institution.

However some of the patients had been placed on anti-hypertensive medication prior to their first assessment at the Cardiac Clinic at Baragwanath Hospital. Moreover, only a small number of patients (39 cases) had been prescribed anti-retroviral therapy (ART) on presentation. The study was approved by the University of the Witwatersrand Ethical Committee and conforms to the principles outlined in the Declaration of Helsinki. All patients provided informed consent.



## Study Data

1  
2  
3 A complete list of study data captured by the registry, comprising basic socio-demographic  
4 (including self-reported ethnicity, years of education and determining if the patient was born in  
5 Soweto) and advanced clinical profiling, has been described previously[8 17] The registry  
6  
7 captured all advanced clinical investigative procedures (e.g. coronary angiography, which was  
8  
9 undertaken in all people diagnosed with coronary artery disease (CAD)). Echocardiography  
10  
11 (performed on all patients) criteria used in the study has been described in detail previously[8  
12  
13 17].  
14  
15  
16

## Case Classifications

17  
18  
19 Adjudication and classification of communicable and non-communicable presentations of HD in  
20  
21 this cohort have been previously described[8]. After exclusion of those with uncomplicated  
22  
23 hypertension (i.e. without evidence of cardiac dysfunction, n=380) or other non-modifiable  
24  
25 aetiologies (e.g. congenital disorders), 1199 patients of African descent (22% of the total 'Heart  
26  
27 of Soweto' cohort) were included in this analysis. Contributory diagnoses for non-communicable  
28  
29 HD were predominantly hypertensive heart failure (HT-HF) and coronary artery disease (without  
30  
31 HIV). Communicable heart disease was predominantly classified as HIV-dilated cardiomyopathy  
32  
33 (HIV-DCMO), HIV-pulmonary hypertension, TB pericardial disease, and pericarditis due to other  
34  
35 infection.  
36  
37  
38

## Risk factor definition

39  
40  
41 Optimum lipid levels and treatment goals with established CVD were defined according to  
42  
43 international guidelines[9] adopted by the Lipid and Atherosclerosis Society of South Africa and  
44  
45 the South African Heart Association - high TC: >4.5 mmol/L, high TGs: >1.7 mmol/L, high LDLC:  
46  
47 >2.5 mmol/L and low HDLC: <1.0 for males and <1.2 mmol/L for females[19]. Other risk factors  
48  
49 were measured on a clinical basis, as previously described[17]. Anthropometric measurements  
50  
51 were available for calculation of body mass index (BMI, kg/m<sup>2</sup>) in 854 (71%) cases, the low  
52  
53 reporting rate restricted to ambulatory patients. Obesity was defined as BMI ≥ 30 kg/m<sup>2</sup>. Serum  
54  
55 C-reactive protein (CRP) was measured in a sub-set of 367 patients (31% of all cases) if  
56  
57 clinically indicated (e.g. suspected infection). Patients were stratified into clinically relevant CRP  
58  
59  
60

1 categories[20], as defined by Dhingra and colleagues[21]. Patients with a CRP of 1 mg/L (n=19)  
2 were used as reference group and compared to medium (1.1-3.0 mg/L, n=26), high (3.1-10.0  
3 mg/L, n=83) and very high (>10.0 mg/L, n=239) CRP categories.  
4  
5

### 6 **Statistical analyses**

7  
8 Normally distributed continuous data are presented as the mean  $\pm$  standard deviation and non-  
9 Gaussian distributed variables as the median (inter-quartile range). Categorical data are  
10 presented as sample number and percentages. For group comparisons, we initially used Chi  
11 Square ( $\chi^2$ ) analysis with calculation of odds ratios (OR) with 95% confidence intervals (CI)  
12 presented where appropriate for discrete variables, and independent T-tests for normally  
13 distributed continuous variables and Mann-Whitney U test for nonparametric continuous  
14 variables. Multiple logistic regression analyses (entry model) were used to derive age and sex  
15 adjusted ORs (and BMI in some analyses, as described) for the risk of presenting with clinically  
16 relevant variables (primarily dyslipidaemia profiles), according to CD HD relative to NCD  
17 diagnosis. Significance was accepted at the two-sided level of  $p < 0.05$ .  
18  
19  
20  
21  
22  
23  
24  
25  
26  
27  
28  
29  
30  
31  
32  
33  
34  
35  
36  
37  
38  
39  
40  
41  
42  
43  
44  
45  
46  
47  
48  
49  
50  
51  
52  
53  
54  
55  
56  
57  
58  
59  
60

## RESULTS

## Clinical and Demographic Profile

**Table 1** shows the socio-demographic and clinical profile of this cohort according to cardiac aetiology. Those presenting with non-communicable HD (n=678, 56.5% of cohort) were older and had higher BMI and mean SBP and DBP than those with communicable HD (n=521, 43.5%; all comparisons p<0.001). Overall, 76 (6%) were confirmed HIV-positive: 15 (2%) and 61 (12%) patients were confirmed HIV-positive in non-communicable and communicable HD groups respectively (P<0.001). Apart from higher BMIs in women (30.6 ± 6.9 vs. 26.7 ± 5.5 kg/m<sup>2</sup> in males, p<0.001) there were no significant differences between sexes in respect to other clinical parameters. To this, the prevalence of obesity in women was 50% as compared to men (26%), P<0.001.

**TABLE 1 Clinical and demographic profile according to heart disease aetiology**

|                                | ALL Cases<br>n=1199 | Non-communicable<br>n=678 (57%) | Communicable<br>n=521 (43%) | P value |
|--------------------------------|---------------------|---------------------------------|-----------------------------|---------|
| <b>Demographic Profile</b>     |                     |                                 |                             |         |
| Mean age (years)               | 58.3 ±14.0          | 60.1 ± 13.1                     | 55.9 ± 14.9                 | <0.001  |
| Female                         | 701 (59%)           | 403 (59%)                       | 298 (57%)                   | 0.44    |
| <6 years formal education      | 582 (49%)           | 335 (49%)                       | 247 (47%)                   | 0.52    |
| Soweto origin                  | 562 (47%)           | 327 (48%)                       | 235 (45%)                   | 0.29    |
| <b>Clinical Presentation</b>   |                     |                                 |                             |         |
| Total cholesterol (mmol/L)     | 4.0 ± 1.4           | 4.3 ± 1.3                       | 3.7 ± 1.2                   | <0.001  |
| HDLC (mmol/L)                  | 1.1 ± 0.5           | 1.2 ± 0.5                       | 1.0 ± 0.5                   | <0.001  |
| Median triglycerides (mmol/L)* | 1.1 (0.8, 1.5)      | 1.1 (0.8,1.6)                   | 1.0 (0.7, 1.3)              | <0.001  |
| LDLC (mmol/L)                  | 2.4 ± 1.0           | 2.5 ± 1.0                       | 2.2 ± 0.9                   | <0.001  |
| TC:HDLC ratio                  | 4.3 ± 3.0           | 4.2 ± 3.1                       | 4.4 ± 2.7                   | 0.27    |
| LDL:HDLC ratio                 | 2.5 ± 1.1           | 2.5 ± 1.0                       | 2.7 ± 1.1                   | 0.36    |
| TG:HDLC ratio*                 | 1.1 (0.7, 1.7)      | 1.0 (0.7, 1.7)                  | 1.1 (0.7, 1.8)              | 0.12    |
| Median serum CRP (mg/L)*       | 19 (7.0, 45.0)      | 16.8 (6.6,41.5)                 | 20.5 (7.8, 55.9)            | 0.25    |

|                                                                  |            |            |            |        |
|------------------------------------------------------------------|------------|------------|------------|--------|
| <b>Systolic BP (mmHg)</b>                                        | 135 ± 29   | 143 ± 29   | 126 ± 26   | <0.001 |
| <b>Diastolic BP (mmHg)</b>                                       | 78 ± 16    | 80 ± 16    | 74 ± 16    | <0.001 |
| <b>BMI (kg/m<sup>2</sup>)</b>                                    | 29.0 ± 6.7 | 30.3 ± 6.7 | 27.2 ± 6.2 | <0.001 |
| <b>Prevalence of dyslipidaemia (n, %)</b>                        |            |            |            |        |
| <b>High total cholesterol (&gt; 5mmol/L)</b>                     | 378 (32%)  | 266 (39%)  | 112 (22%)  | <0.001 |
| <b>Low HDLC (&lt; 1 in males and &lt; 1.2 mmol/L in females)</b> | 694 (58%)  | 344 (51%)  | 350 (67%)  | <0.001 |
| <b>High LDLC (&gt; 2.5 mmol/L)</b>                               | 446 (37%)  | 291 (43%)  | 155 (30%)  | <0.001 |
| <b>High triglycerides (&gt; 1.7 mmol/l)</b>                      | 215 (18%)  | 143 (21%)  | 72 (14%)   | 0.001  |
| <b>Prevalence of other risk factors (n, %)</b>                   |            |            |            |        |
| <b>Obese (BMI &gt;30 kg/m<sup>2</sup>)</b>                       | 344 (40%)  | 237 (48%)  | 107 (30%)  | <0.001 |
| <b>Type 2 diabetes</b>                                           | 98 (8%)    | 71 (11%)   | 27 (5%)    | <0.001 |
| <b>Past or current smoker</b>                                    | 566 (47%)  | 321(47%)   | 245 (47%)  | 0.95   |
| <b>Family history of CVD</b>                                     | 466 (39%)  | 286 (42%)  | 180 (35%)  | 0.01   |
| <b>Confirmed HIV-positive cases</b>                              | 76 (6%)    | 15 (2%)    | 61 (12%)   | <0.001 |

Table legend:

LDLC = low-density lipoprotein cholesterol; HDLC = high-density lipoprotein cholesterol; TG = triglycerides; BMI = body mass index (available in 854 cases); CRP = C-reactive protein (available in 367 cases); CVD = cardiovascular disease; HIV = human immunodeficiency virus.

\*Median (interquartile range) values presented, differences tested by Mann-Whitney U test

**Aetiology of heart disease (primary diagnosis)**

Overall, the most prevalent primary diagnoses were HT-HF (n=461, 38%), dilated cardiomyopathy (DCMO, n= 178, 15%) and CAD (n=157, 12%). In those classified as non-communicable HD, HT-HF was the main primary diagnosis (n=461, 68%), along with CAD (without concurrent HIV-infection; n=157, 23%). Dilated cardiomyopathy (n=178, 34%), right heart failure (n=92, 18%) and right heart disease (n=63, 12%) and other forms of primary valve

1 disease (n=71, 14%), were the most common diagnoses in those classified with communicable  
2 forms of HD.  
3

#### 4 **Lipid Profiles**

5 Those with communicable HD had significantly lower TC, LDLC, and HDLC compared with  
6 patients with non-communicable HD (**Table 1** and **Figure 1**,  $p<0.001$  for all comparisons).  
7

8 Overall, women had significantly higher TC ( $4.2\pm 1.3$  mmol/L vs.  $3.8\pm 1.2$  mmol/L,  $p<0.001$ );  
9 LDLC ( $2.4\pm 1.0$  mmol/L vs.  $2.2\pm 1.0$  mmol/L,  $p<0.01$ ), and HDLC compared to men ( $1.2\pm 0.5$   
10 mmol/L vs.  $1.0\pm 0.5$  mmol/L,  $p<0.001$ ). This gender difference did not extend to triglycerides  
11 ( $1.1(0.4-1.8)$  mmol/L vs.  $1.1(0.4-1.8)$ ,  $p=0.7$ ) nor TC:HDLC ratio ( $4.2 \pm 3.1$  mmol/L vs.  $4.3 \pm 2.7$   
12 mmol/L,  $p=0.6$ ). Lipid ratios were calculated and compared (**Table 1**). There was no significant  
13 differences between aetiology groups for either TC:HDL or TG:HDL groups. However LDL:HDL  
14 ratios were significantly higher in the communicable group.  
15

16 Levels of TC (Figure 1A), HDLC (Figure 1B) and LDLC (Figure 1C) were significantly higher in  
17 females with non-communicable HD (**Figure 1**). However in those diagnosed with  
18 communicable HD, small, but significant, differences were observed only for TC and HDLC, not  
19 LDL (**Figure 1**). Overall, prevalence of dyslipidaemia varied from 18% of patients with high  
20 triglycerides to 58% with low HDLC (**Table 1** and **Figure 2**). Consistent with the decrease  
21 observed with the actual levels, prevalence of high TC and high LDLC was increased in those  
22 with non-communicable HD aetiologies while low HDLC levels prevalence was higher in those  
23 with communicable HD (**Table 1** and **Figure 2**). There were no patients with TG levels  $> 4.5$   
24 mmol/L (range 0.1-3.8 mmol/L) which makes use of the Friedewald equation suitable for this  
25 cohort[18].  
26

27 **Table 2** shows independent associations between relevant socio-economic, demographic and  
28 clinical variables and communicable HD aetiology, relative to those presenting with non-  
29 communicable HD. The effect of HD aetiology on low HDLC dyslipidaemia was strong and  
30 consistent: adjusting for age, sex and BMI of patients, those with forms of communicable HD  
31 were significantly more likely to record a low HDLC relative to those presenting with non-  
32 communicable HD (**Table 2**,  $p<0.001$ ) and less likely to record high TC and LDLC (**Table 2**).  
33  
34  
35  
36  
37  
38  
39  
40  
41  
42  
43  
44  
45  
46  
47  
48  
49  
50  
51  
52  
53  
54  
55  
56  
57  
58  
59  
60

Patients with communicable HD were less likely to record high triglyceride levels (OR 0.65, 95%CI 0.51, 0.84,  $p < 0.05$ ) compared to those with non-communicable HD.

**TABLE 2 Independent correlates of communicable heart disease, relative to non-communicable heart disease**

|                                          | Communicable disease |               |
|------------------------------------------|----------------------|---------------|
|                                          | Odds Ratio           | 95% CI        |
| Female sex                               | 0.91                 | 0.72, 1.15    |
| Age                                      | 0.98                 | 0.97, 0.99**  |
| Obesity                                  | 0.50                 | 0.37, 0.68*** |
| < 6 years formal education               | 1.11                 | 0.88, 1.42    |
| Soweto origin                            | 0.98                 | 0.77, 1.24    |
| <b>Body mass index adjusted analysis</b> |                      |               |
| High TC                                  | 0.52                 | 0.37, 0.71*** |
| High LDLC                                | 0.56                 | 0.41, 0.76*** |
| Low HDLC                                 | 1.91                 | 1.42, 2.57*** |
| High TG                                  | 0.65                 | 0.51, 0.84*   |

Table legend:

Obesity BMI  $> 30 \text{ kg/m}^2$ ; High total cholesterol (TC)  $> 4.5 \text{ mmol/L}$ ; High low density lipoprotein (LDLC)  $> 2.5 \text{ mmol/L}$ ; Low high density lipoprotein (HDLC) ( $< 1.0 \text{ mmol/L}$  in males,  $< 1.2 \text{ mmol/L}$  in females). OR = odds ratio; CI = confidence intervals. Age and sex-adjusted analysis: \*  $p < 0.05$ ; \*\* $p < 0.01$ ; \*\*\* $p < 0.001$ .

**CRP subset analysis**

Overall, there was no significant difference in CRP levels between aetiology groups (**Table 1**). The proportion of confirmed HIV cases in this CRP subset analysis was 7% ( $n=27$ ). Of those, 23 were in the very high-risk category. There was also no association between CRP-derived risk categories and high TC, LDLC or triglycerides (data not shown). However the risk of having low HDLC increased with increasing CRP levels. In age and sex-adjusted analyses, those with

1  
2  
3  
4  
5  
6  
7  
8  
9  
10  
11  
12  
13  
14  
15  
16  
17  
18  
19  
20  
21  
22  
23  
24  
25  
26  
27  
28  
29  
30  
31  
32  
33  
34  
35  
36  
37  
38  
39  
40  
41  
42  
43  
44  
45  
46  
47  
48  
49  
50  
51  
52  
53  
54  
55  
56  
57  
58  
59  
60

medium risk (OR 2.73, 95% CI 0.68, 10.89, P=0.16), high risk (OR 4.98, 95% CI 1.46, 17.00, P=0.01) and very high risk (OR 6.37, 95% CI 1.97, 20.57, p<0.01) CRP levels were significantly more likely to record a low HDLC relative to those in the low risk CRP group. Also, when stratified by sex, a strong, positive association remained in females but was no longer apparent in males (**Figure 3**). In females, the pattern was significant across all CRP risk categories: compared to low risk, those with medium risk (OR 12.1, 95% CI 1.21, 120, p=0.03), high risk (OR 14.4, 95% CI 1.64, 126, p=0.02) and very high risk (OR 23.5, 95% CI 2.81, 197, p=0.004) CRP levels were all more likely to record a low HDLC. Moreover, the association was not weakened by addition of BMI into the model (BMI and CRP measurements available in only 230 cases) in overall and female-only (n=133) models: those with medium risk (OR 20.5, 95% CI 1.72, 246, p=0.02), high risk (OR 10.6, 95% CI 1.14, 98.8, p=0.04) and very high risk (OR 21.0, 95% CI 2.38, 185, p<0.01) CRP levels were all more likely to record a low HDLC.

## DISCUSSION

1  
2 We report significant decreases in lipid levels (TC, HDLC and LDLC) and age and BMI  
3 according to non-communicable and communicable manifestations of *de novo* HD in urban  
4 Africans, patterns that were observed in both sexes. The high prevalence of low HDLC in more  
5 than half of all cases, but much higher in those with communicable HD, is most striking. Also, it  
6 appears that gender is an effect modifier in the relationship between CRP and low HDLC in this  
7 cohort, but, importantly, the relationship remains even after adjustment for the significant  
8 confounder of adiposity.  
9

10  
11 While traditionally uncommon[22], dyslipidaemia, in particular low HDLC, is becoming  
12 more prevalent in sub-Saharan Africa[23]. The low lipid levels present in the majority of cases  
13 with communicable HD reflects the dramatic changes to lipid metabolism observed in infection  
14 and is therefore, anticipated. We acknowledge that atherogenic LDLC is also low in this setting  
15 and that low HDLC may not be indicative of particularly increased disease risk, at least in the  
16 short-term. However we still deem this as highly clinically relevant given that even isolated low  
17 HDLC is associated with a higher risk of atherosclerotic forms of HD, a finding that has been  
18 seen in diverse populations[12-14]. Interestingly triglyceride levels were not significantly  
19 increased in those with communicable forms of HD, despite evidence that it can increase as  
20 part of the infectious/inflammatory metabolic milieu[15]. Additionally, we speculate that the  
21 higher lipid levels in women may be the result of much higher rates of obesity (50% compared  
22 with 26% in men) as the driver of elevated total cholesterol, which has been suggested by  
23 authors of a worldwide systematic analysis on high TC [24].  
24  
25  
26  
27  
28  
29  
30  
31  
32  
33  
34  
35  
36  
37  
38  
39  
40  
41  
42  
43  
44

45  
46 Our interest in this phenomenon predominantly relates to the longer-term effects of low  
47 HDLC, especially when observed together with the amplified vascular risk associated with  
48 chronic infection[15]. In Africa, where acute coronary syndromes are seen in a relatively young  
49 population[25], we predict the very high rates of myriad communicable disease[26 27] will result  
50 in more complex cases, with potentially poorer outcomes in the long-term, given the critical role  
51 of HDLC in both innate and adaptive immunity[15]. While many infectious diseases (bacterial  
52 and viral) have contributed to the underlying pathology of HD reported here[5], dyslipidemia  
53  
54  
55  
56  
57  
58  
59  
60



1 associated with HIV infection has been particularly well studied. HIV-related low HDLC is likely a  
2 consequence of both the viral infection and an adverse effect of some anti-retroviral treatment  
3 regimens[27-30], however only 39 patients of the 76 (51%) confirmed HIV-positive were on ART  
4 at time of presentation, representing 3% of entire subset sample, which possibly dilutes this  
5 effect.  
6  
7  
8  
9

10 Our CRP subset analysis found associations between low HDLC and the pro-  
11 inflammatory marker CRP in patients with newly diagnosed HD in a sex disparate manner, with  
12 a much stronger positive association in females. Median CRP levels were also very high across  
13 all categories of HD aetiology, and are much higher than previous reports in both early analyses  
14 of large cohorts[20] as well as South African studies[31], but reflect the clinical requirements at  
15 presentation. These high levels may also be the result of 'multi-morbidity' observed in the  
16 cohort, given the prevalence of infectious disease (such as HIV/AIDS) as well as other lifestyle  
17 factors that can also influence CRP levels[32]; all of which may have contributed to the high  
18 levels observed. Inflammatory stress may be having a more adverse effect on HDLC in women  
19 compared to men as a result of many causes. The prognostic value of stratifying CVD risk, even  
20 at very high CRP (>10 mg/L) levels, has been demonstrated in a very large female cohort[20],  
21 and there are reports of elevated CRP in female populations of African descent[33]. We also  
22 report females as having a significantly higher BMI; obesity itself can induce a low-grade  
23 inflammatory response, however the association between low HDLC and CRP in women  
24 remained even after adjusting for BMI. While we have assumed that the exaggerated drop in  
25 HDLC in women with acute forms of communicable HD is a consequence rather than a cause of  
26 infection, treatment of atherogenic dyslipidaemia and inflammatory markers in women are of  
27 particular clinical relevance in a setting where obesity and its antecedent behaviours are  
28 increasing.  
29  
30  
31  
32  
33  
34  
35  
36  
37  
38  
39  
40  
41  
42  
43  
44  
45  
46  
47  
48  
49  
50  
51

52 These results underscore the need to consider multifactorial CVD risk burden that  
53 recognises that co-occurrence of infectious and non-communicable disease produces significant  
54 and complex health disparities. Certainly, the clinical strategies to protect the heart and vessels  
55 in acute infection differ from those required in chronic infection and it is unlikely that lipid  
56  
57  
58  
59  
60

1 measurements will form a cornerstone of treatment in such cases. However, it is important to  
2 recognise the benefits of early detection and treatment of dyslipidaemia in order to mitigate any  
3 double effect of infectious *and* 'lifestyle' HD risk factors in the longer term. While the  
4 epidemiological evidence is clear, the precise mechanism by which HDLC decreases  
5 atherosclerotic CVD risk remains unclear[11]; indeed, efforts to develop pharmacological  
6 modalities to specifically increase HDLC levels to reduce cardiovascular risk, continues to be  
7 problematic[10] and we acknowledge that addressing the low HDLC observed in this cohort, in  
8 isolation, without commensurate improvements in HDLC functionality, will prove a difficult task.  
9 This does not, however, preclude use of other therapeutic interventions that address the  
10 greater, more complex risk presentation of cases that fall in the 'crossover' between  
11 communicable and non-communicable diseases. For example, the polypill, which includes lipid-  
12 lowering medications, has been proposed as a viable treatment option in secondary prevention,  
13 given its relative ease of use and efficacy in low-income settings[34]. More so, evidence that  
14 statins also exert immunomodulatory effects, along with suggestions they may prove useful in  
15 the treatment and prevention of infections[35], indicate they may have important, multi-faceted  
16 clinical implications in populations such as Soweto, especially given the substantial  
17 dyslipidaemic risk associated with highly-prevalent HIV infection and ART. Attempts to address  
18 prevention, management, cure and control of non-communicable and communicable forms of  
19 HD as entirely separate entities are likely to prove insufficient. This holds true on a per-patient  
20 basis as well as for any population-wide, public health approaches.

21  
22  
23  
24  
25  
26  
27  
28  
29  
30  
31  
32  
33  
34  
35  
36  
37  
38  
39  
40  
41  
42  
43  
44 There are a number of limitations that require consideration. Clinical data (other than  
45 routine echocardiography and 12-lead ECG) were obtained according to presentation. This  
46 study was not specifically designed to comprehensively delineate between specific forms of HD  
47 (resulting in variable clinical data) although this is part of clinical investigation at Baragwanath  
48 Hospital; although it should be noted HIV status is not routinely determined. The arbitrary  
49 selection of disease states into the communicable versus non-communicable groups (e.g.  
50 primary valve disease) may be questioned; hence our further delineation of clearly identifiable  
51 cases of acute inflammation/infection at the point of admission. However, we would emphasise  
52  
53  
54  
55  
56  
57  
58  
59  
60

1 that classification was prospectively applied, the groupings are consistent with our previous  
2 reports that describe in detail the rigorous clinical criteria employed in profiling the 'Heart of  
3 Soweto' cohort, and expected gradients in lipid levels were subsequently found. Systematic bias  
4 needs to be carefully considered before attributing broad patterns in lipid profiles, as those with  
5 suspected atherosclerotic disease were more likely to have had lipid levels measured, reflecting  
6 the low number of those presenting an acute infectious form of HD (for example, patients with  
7 pericarditis). Adiposity, a major confounder of both dyslipidaemia and HD, was recorded in 71%  
8 of the cohort. However, its inclusion in the regression analyses did not alter the significance of  
9 the associations. Central obesity measurements (e.g. waist-to-hip ratio) may have offered  
10 greater delineation of CVD risk but data were not available. CRP was measured in just under  
11 one third of cases and related data requires careful interpretation. Finally, owing to the cross-  
12 sectional design of this study we were not able to investigate the possible effect of the  
13 magnitude and timing of the contributing infection on lipid levels, beyond the data collected at  
14 admission. Given the transient, dynamic processes of lipid metabolism over the course of acute  
15 and chronic diseases, only longitudinal studies of lipid levels and subsequent outcomes can fully  
16 elucidate the clinical importance of our findings.

## 35 **Conclusions**

36 We have shown that despite largely favourable lipid profiles, there are clear differences  
37 according to underlying aetiology of HD in urban Africans however, overall low HDLC was the  
38 most prevalent metabolic abnormality observed in this cohort. Younger Africans with  
39 communicable HD have particularly low levels of HDLC that, if maintained in the longer term,  
40 may leave them at increased risk of atherosclerotic disease. This is physiologically plausible in  
41 chronic infection; however low HDL at hospital admission could also simply reflect similarly low  
42 levels of TC/LDL and may not be indicative of increased long-term CVD risk. That uncertainty  
43 can only be resolved by well-powered studies with adequate follow-up, to provide sufficient  
44 evidence to address current gaps in evidence and, ultimately, guide clinical practice.  
45 Nevertheless if proven, targeted prevention programs that identify and actively manage  
46 individuals with a history of communicable HD (particularly an active case) and with low levels of  
47  
48  
49  
50  
51  
52  
53  
54  
55  
56  
57  
58  
59  
60

1  
2  
3  
4  
5  
6  
7  
8  
9  
10  
11  
12  
13  
14  
15  
16  
17  
18  
19  
20  
21  
22  
23  
24  
25  
26  
27  
28  
29  
30  
31  
32  
33  
34  
35  
36  
37  
38  
39  
40  
41  
42  
43  
44  
45  
46  
47  
48  
49  
50  
51  
52  
53  
54  
55  
56  
57  
58  
59  
60

HDLC may be indicated. The alternative is an increasing burden of non-communicable forms of HD in urban African communities that is supplemented (in origin and confluence) by historical cases of communicable disease that have adversely affected protective HDLC levels (particularly in women).

For peer review only

## Acknowledgements

We thank all the doctors, nurses, and patients who participated in the registry; and Elisabeth Tshele, Bridget Phooko, Maureen Kubheka and Phutuma Mathusi who contributed to the meticulous collection and management of clinical data.

## Competing interests

All authors declare: all authors had financial support from independent funding bodies, including University of the Witwatersrand and unconditional research grants from Adcock-Ingram, the Medtronic Foundation USA, Servier, Bayer-Schering and BHP Billiton, for the submitted work; no financial relationships with any organisations that might have an interest in the submitted work in the previous 3 years; no other relationships or activities that could appear to have influenced the submitted work.

## Funding

The 'Heart of Soweto Study' registry was supported by the University of the Witwatersrand and unconditional research grants from Adcock-Ingram, the Medtronic Foundation USA, Servier, Bayer-Schering and BHP Billiton. SS, MJC and JGL are supported by the National Health & Medical Research Council of Australia [Program Grants 320860 and 631947 and Postgraduate scholarship 586739]. JGL is supported by the National Heart Foundation of Australia and Cardiac Society of Australia and New Zealand. Baker IDI is supported by the Victorian Government's Operational Infrastructure Support Program. KS and SL are supported by the MRC South Africa and the University of Cape Town.

## Author's contributions:

KS, MJC and SS participated in the original design of the study and supervised the collection of data. JGL prepared the first draft of the manuscript, with edits and revisions provided by all authors. FR and FT revised manuscript critically for important intellectual content. All authors

1 had full access to all the data and read and approved the final version of the manuscript. All  
2 authors had final responsibility for the decision to submit the manuscript for publication.  
3  
4  
5

6  
7 **Data sharing statement**  
8

9 Study data will be available on request from the corresponding author.  
10  
11  
12  
13  
14  
15  
16  
17  
18  
19  
20  
21  
22  
23  
24  
25  
26  
27  
28  
29  
30  
31  
32  
33  
34  
35  
36  
37  
38  
39  
40  
41  
42  
43  
44  
45  
46  
47  
48  
49  
50  
51  
52  
53  
54  
55  
56  
57  
58  
59  
60

For peer review only

## REFERENCES:

1. Yusuf S, Reddy S, Ounpuu S, et al. Global burden of cardiovascular diseases: Part II: variations in cardiovascular disease by specific ethnic groups and geographic regions and prevention strategies. *Circulation* 2001;**104**(23):2855-64
2. Vorster HH. The emergence of cardiovascular disease during urbanisation of Africans. *Public Health Nutr* 2002;**5**(1A):239-43
3. Mensah GA. Descriptive epidemiology of cardiovascular risk factors and diabetes in sub-Saharan Africa. *Progress in cardiovascular diseases* 2013;**56**(3):240-50 doi: 10.1016/j.pcad.2013.10.014[published Online First: Epub Date]].
4. Danaei G, Singh GM, Paciorek CJ, et al. The global cardiovascular risk transition: associations of four metabolic risk factors with national income, urbanization, and Western diet in 1980 and 2008. *Circulation* 2013;**127**(14):1493-502, 502e1-8 doi: 10.1161/CIRCULATIONAHA.113.001470[published Online First: Epub Date]].
5. Mocumbi AO, Sliwa K. Women's cardiovascular health in Africa. *Heart* 2012;**98**(6):450-5 doi: 10.1136/heartjnl-2011-301025[published Online First: Epub Date]].
6. Thienemann F, Sliwa K, Rockstroh JK. HIV and the heart: the impact of antiretroviral therapy: a global perspective. *Eur Heart J* 2013;**34**(46):3538-46 doi: 10.1093/eurheartj/eh388[published Online First: Epub Date]].
7. Sliwa K, Carrington MJ, Becker A, et al. Contribution of the human immunodeficiency virus/acquired immunodeficiency syndrome epidemic to de novo presentations of heart disease in the Heart of Soweto Study cohort. *Eur Heart J* 2012;**33**(7):866-74 doi: 10.1093/eurheartj/ehr398[published Online First: Epub Date]].
8. Stewart S, Carrington M, Pretorius S, Methusi P, Sliwa K. Standing at the crossroads between new and historically prevalent heart disease: effects of migration and socio-economic factors in the Heart of Soweto cohort study. *Eur Heart J* 2011;**32**(4):492-9 doi: 10.1093/eurheartj/ehq439[published Online First: Epub Date]].
9. Chapman MJ, Ginsberg HN, Amarenco P, et al. Triglyceride-rich lipoproteins and high-density lipoprotein cholesterol in patients at high risk of cardiovascular disease: evidence and guidance for management. *Eur Heart J* 2011;**32**(11):1345-61 doi: 10.1093/eurheartj/ehr112[published Online First: Epub Date]].
10. Libby P, Ridker PM, Hansson GK. Progress and challenges in translating the biology of atherosclerosis. *Nature* 2011;**473**(7347):317-25 doi: 10.1038/nature10146[published Online First: Epub Date]].
11. Voight BF, Peloso GM, Orho-Melander M, et al. Plasma HDL cholesterol and risk of myocardial infarction: a mendelian randomisation study. *Lancet* 2012;**380**(9841):572-80 doi: 10.1016/S0140-6736(12)60312-2[published Online First: Epub Date]].
12. Huxley RR, Barzi F, Lam TH, et al. Isolated low levels of high-density lipoprotein cholesterol are associated with an increased risk of coronary heart disease: an individual participant data meta-analysis of 23 studies in the Asia-Pacific region. *Circulation* 2011;**124**(19):2056-64 doi: 10.1161/CIRCULATIONAHA.111.028373[published Online First: Epub Date]].
13. Goldbourt U, Yaari S, Medalie JH. Isolated low HDL cholesterol as a risk factor for coronary heart disease mortality. A 21-year follow-up of 8000 men. *Arteriosclerosis, thrombosis, and vascular biology* 1997;**17**(1):107-13
14. deGoma EM, Leeper NJ, Heidenreich PA. Clinical significance of high-density lipoprotein cholesterol in patients with low low-density lipoprotein cholesterol. *Journal of the American College of Cardiology* 2008;**51**(1):49-55 doi: 10.1016/j.jacc.2007.07.086[published Online First: Epub Date]].
15. Khovidhunkit W, Kim MS, Memon RA, et al. Effects of infection and inflammation on lipid and lipoprotein metabolism: mechanisms and consequences to the host. *J Lipid Res*

- 2004;**45**(7):1169-96 doi: 10.1194/jlr.R300019-JLR200[published Online First: Epub Date]].
16. Sliwa K, Lyons JG, Carrington MJ, et al. Different lipid profiles according to ethnicity in the Heart of Soweto study cohort of de novo presentations of heart disease. *Cardiovasc J Afr* 2012;**23**(7):389-95 doi: 10.5830/CVJA-2012-036[published Online First: Epub Date]].
17. Sliwa K, Wilkinson D, Hansen C, et al. Spectrum of heart disease and risk factors in a black urban population in South Africa (the Heart of Soweto Study): a cohort study. *Lancet* 2008;**371**(9616):915-22 doi: 10.1016/S0140-6736(08)60417-1[published Online First: Epub Date]].
18. Friedewald WT, Levy RI, Fredrickson DS. Estimation of the concentration of low-density lipoprotein cholesterol in plasma, without use of the preparative ultracentrifuge. *Clinical chemistry* 1972;**18**(6):499-502
19. Klug E. South African dyslipidaemia guideline consensus statement. *S Afr Med J* 2012;**102**(3 Pt 2):178-87
20. Ridker PM, Cook N. Clinical usefulness of very high and very low levels of C-reactive protein across the full range of Framingham Risk Scores. *Circulation* 2004;**109**(16):1955-9 doi: 10.1161/01.CIR.0000125690.80303.A8[published Online First: Epub Date]].
21. Dhingra R, Gona P, Nam BH, et al. C-reactive protein, inflammatory conditions, and cardiovascular disease risk. *Am J Med* 2007;**120**(12):1054-62 doi: 10.1016/j.amjmed.2007.08.037[published Online First: Epub Date]].
22. Zoratti R. A review on ethnic differences in plasma triglycerides and high-density-lipoprotein cholesterol: is the lipid pattern the key factor for the low coronary heart disease rate in people of African origin? *Eur J Epidemiol* 1998;**14**(1):9-21
23. Ulasi, II, Ijoma CK, Onodugo OD. A community-based study of hypertension and cardio-metabolic syndrome in semi-urban and rural communities in Nigeria. *BMC Health Serv Res* 2010;**10**:71 doi: 10.1186/1472-6963-10-71[published Online First: Epub Date]].
24. Farzadfar F, Finucane MM, Danaei G, et al. National, regional, and global trends in serum total cholesterol since 1980: systematic analysis of health examination surveys and epidemiological studies with 321 country-years and 3.0 million participants. *Lancet* 2011;**377**(9765):578-86 doi: 10.1016/S0140-6736(10)62038-7[published Online First: Epub Date]].
25. Steyn K, Sliwa K, Hawken S, et al. Risk factors associated with myocardial infarction in Africa: the INTERHEART Africa study. *Circulation* 2005;**112**(23):3554-61 doi: 10.1161/CIRCULATIONAHA.105.563452[published Online First: Epub Date]].
26. Tollman SM, Kahn K, Sartorius B, et al. Implications of mortality transition for primary health care in rural South Africa: a population-based surveillance study. *Lancet* 2008;**372**(9642):893-901 doi: 10.1016/S0140-6736(08)61399-9[published Online First: Epub Date]].
27. Adewole OO, Eze S, Betiku Y, et al. Lipid profile in HIV/AIDS patients in Nigeria. *Afr Health Sci* 2010;**10**(2):144-9
28. Anastos K, Ndamage F, Lu D, et al. Lipoprotein levels and cardiovascular risk in HIV-infected and uninfected Rwandan women. *AIDS Res Ther* 2010;**7**:34 doi: 10.1186/1742-6405-7-34[published Online First: Epub Date]].
29. Armstrong C, Liu E, Okuma J, et al. Dyslipidemia in an HIV-positive antiretroviral treatment-naive population in Dar es Salaam, Tanzania. *J Acquir Immune Defic Syndr* 2011;**57**(2):141-5 doi: 10.1097/QAI.0b013e318219a3d1[published Online First: Epub Date]].
30. Buchacz K, Weidle PJ, Moore D, et al. Changes in lipid profile over 24 months among adults on first-line highly active antiretroviral therapy in the home-based AIDS care program in rural Uganda. *J Acquir Immune Defic Syndr* 2008;**47**(3):304-11



- 1 31. Ntyintyane L, Panz V, Raal FJ, et al. Leptin, adiponectin, and high-sensitivity C-reactive  
2 protein in relation to the metabolic syndrome in urban South African blacks with and  
3 without coronary artery disease. *Metab Syndr Relat Disord* 2009;**7**(3):243-8
- 4 32. Nordestgaard BG. Does elevated C-reactive protein cause human atherothrombosis? Novel  
5 insights from genetics, intervention trials, and elsewhere. *Curr Opin Lipidol*  
6 2009;**20**(5):393-401 doi: 10.1097/MOL.0b013e3283307bfe[published Online First: Epub  
7 Date]].
- 8 33. Albert MA, Glynn RJ, Buring J, et al. C-reactive protein levels among women of various  
9 ethnic groups living in the United States (from the Women's Health Study). *Am J Cardiol*  
10 2004;**93**(10):1238-42 doi: 10.1016/j.amjcard.2004.01.067[published Online First: Epub  
11 Date]].
- 12 34. Yusuf S, Islam S, Chow CK, et al. Use of secondary prevention drugs for cardiovascular  
13 disease in the community in high-income, middle-income, and low-income countries (the  
14 PURE Study): a prospective epidemiological survey. *Lancet* 2011 doi: 10.1016/S0140-  
15 6736(11)61215-4[published Online First: Epub Date]].
- 16 35. Tleyjeh IM, Kashour T, Hakim FA, et al. Statins for the prevention and treatment of  
17 infections: a systematic review and meta-analysis. *Arch Intern Med* 2009;**169**(18):1658-  
18 67 doi: 10.1001/archinternmed.2009.286[published Online First: Epub Date]].
- 19
- 20
- 21
- 22
- 23
- 24
- 25
- 26
- 27
- 28
- 29
- 30
- 31
- 32
- 33
- 34
- 35
- 36
- 37
- 38
- 39
- 40
- 41
- 42
- 43
- 44
- 45
- 46
- 47
- 48
- 49
- 50
- 51
- 52
- 53
- 54
- 55
- 56
- 57
- 58
- 59
- 60

**FIGURE 1 Sex specific lipid profiles according to heart disease aetiology**Figure legend:

Lipid values are shown as mean  $\pm$  standard error. P values indicate between-sex comparisons per aetiology group (T-test), \*\* =  $P < 0.01$ ; \* =  $P < 0.05$ . NCD = non-communicable heart disease; CD = communicable heart disease; TC= total cholesterol; HDL= high-density lipoprotein cholesterol; LDL= low-density lipoprotein. Y-axis dotted lines show thresholds for high TC and LDL or low HDL (sex specific values).

**FIGURE 2 Prevalence of low high-density lipoprotein cholesterol according to heart disease aetiology**Figure legend:

NCD = non-communicable heart disease; CD = communicable heart disease.

High total cholesterol (TC)  $> 4.5$  mmol/L; Low high-density lipoprotein cholesterol (HDLC) ( $< 1.0$  mmol/L in males,  $< 1.2$  mmol/L in females). High low density lipoprotein cholesterol (LDLC)  $> 2.5$  mmol/L; High triglycerides (TGs)  $> 1.7$  mmol/L

**FIGURE 3 Risk of low high-density lipoprotein cholesterol according to C-reactive protein risk group, relative to low-risk C-reactive protein group (n=367)**Figure legend:

Age-adjusted analysis. CRP = C-reactive protein. \*\* =  $P < 0.01$ ; \* =  $P < 0.05$  relative to low CRP group. For confidence intervals, please refer to Results section.

1  
2  
3  
4  
5  
6  
7  
8  
9  
10  
11  
12  
13  
14  
15  
16  
17  
18  
19  
20  
21  
22  
23  
24  
25  
26  
27  
28  
29  
30  
31  
32  
33  
34  
35  
36  
37  
38  
39  
40  
41  
42  
43  
44  
45  
46  
47  
48  
49  
50  
51  
52  
53  
54  
55  
56  
57  
58  
59  
60

**Lower Levels of High-density Lipoprotein Cholesterol in Urban Africans  
Presenting with Communicable Versus Non-communicable Forms of Heart  
Disease: The 'Heart of Soweto' hospital registry study**

**Short title:** Lyons – HDLC in communicable heart disease

**Authors:** Jasmine G. Lyons (1, 2)  
Karen Sliwa (3, 4)  
Melinda J. Carrington (1, 4, 5)  
Frederick Raal (7)  
Sandra Pretorius (3)  
Friedrich Thienemann (3, 6, 8)  
Simon Stewart (1, 3, 4, 5)

**Affiliations:**

- (1) Baker IDI Heart and Diabetes Institute, Melbourne, Australia
- (2) [Division of Health Sciences, University of South Australia, Adelaide, Australia](#)
- (3) Hatter Institute for Cardiovascular Research in Africa, Cape Heart Group and IIDMM, University of Cape Town, Cape Town, South Africa
- (4) Soweto Cardiovascular Research Unit, University of the Witwatersrand, Johannesburg, South Africa
- (5) Department of Epidemiology and Preventative Medicine, Monash University, Melbourne, Australia
- (6) Institute of Infectious Diseases and Molecular Medicine, University of Cape Town, South Africa
- (7) Carbohydrate and Lipid Metabolism Research unit, University of the Witwatersrand, Johannesburg, South Africa
- (8) Infectious Diseases Referral Clinic, GF Jooste Hospital, Manenberg, South Africa

**Address for Correspondence:** Professor Simon Stewart, Preventative Health, Baker IDI Heart and Diabetes Institute, PO Box 6492, St Kilda Rd Central, Melbourne, Victoria, 8008, Australia  
E-mail: [simon.stewart@bakeridi.edu.au](mailto:simon.stewart@bakeridi.edu.au)

Telephone: +61 3 8532 1640

Fax: +61 3 8532 1100

1  
2  
3  
4 **Key Words:** High-density lipoprotein, lipids, infection, epidemiologic transition, Africa.  
5  
6

7  
8 **Word count:** [3540](#) not including 2 tables, 3 figures and [35](#) references.  
9  
10  
11  
12  
13  
14  
15  
16  
17  
18  
19  
20  
21  
22  
23  
24  
25  
26  
27  
28  
29  
30  
31  
32  
33  
34  
35  
36  
37  
38  
39  
40  
41  
42  
43  
44  
45  
46  
47  
48  
49  
50  
51  
52  
53  
54  
55  
56  
57  
58  
59  
60

For peer review only

**ABSTRACT**

**Objectives:** To investigate if urban Africans displayed lower levels of atheroprotective high-density lipoprotein cholesterol (HDLC) when presenting with communicable versus non-communicable forms of heart disease (HD) as both acute infection and chronic inflammation reduce HDLC levels.

**Design:** Hospital registry of 5328 de novo cases of HD over a 3-year period.

**Setting:** Cardiology Unit, Baragwanath Hospital in Soweto, South Africa.

**Participants:** A total of 1199 patients of African descent (59% female; 57.0±13.4 years) had fasting blood lipid levels (Total cholesterol [TC], triglyceride, HDLC, and low-density lipoprotein [LDLC] cholesterol) documented on admission. Serum inflammatory marker C-reactive protein (CRP) was measured in a sub-set of 367 patients (31% of cases).

**Main outcome measures:** Lipid profiles were compared according to pre-specified classification of non-communicable (e.g. hypertensive HD) versus communicable (e.g. rheumatic HD) HD. Low HDLC was defined as <1.0 mmol/L for males and <1.2mmol/L for females, according to applicable South African Clinical Guidelines.

**Results:** Overall 694 (58%) of those presenting with HD had low HDLC levels; 344 of 678 (51%) and 350 of 521 (67%) for non-communicable and communicable, respectively ( $p<0.001$ ). Comparatively, overall prevalence of high TC was 32% and high LDLC was 37%. On an adjusted basis, those with non-communicable HD were more likely to record a low HDLC relative to non-communicable presentations (OR 1.91, 95%CI 1.42, 2.57;  $p<0.001$ ). There was a strong relationship between low HDLC and higher levels of CRP, but only in females.

**Conclusions:** Despite largely favourable lipid profiles, there are clear differences according to aetiology of underlying HD in urban Africans, with younger patients with communicable HD having particularly low levels of HDLC. Appropriate prospective evidence is needed to determine if persistent low levels of HDLC expose patients to increased, long-term risk of atherosclerotic forms of HD. The female-only inverse association between HDL-C and CRP warrants further investigation.

**ARTICLE SUMMARY****Article focus:**

- In sub-Saharan Africa, the incidence of non-communicable cardiovascular disease is increasing while, simultaneously, communicable forms of heart disease continue to cause considerable levels of morbidity and mortality.
- In this study, we have sought to explore one heart disease risk factor, dyslipidaemia, in a well-defined clinical registry in Soweto, South Africa.
- Lipid profiles from 1199 de novo presentations of heart disease were compared according to pre-specified classification of non-communicable heart disease (e.g. hypertensive heart disease) versus communicable forms of heart disease (e.g. pericarditis or chronic rheumatic heart disease). We hypothesised that those diagnosed with communicable heart disease would display an adverse lipid profile, with low levels of atheroprotective high-density lipoprotein cholesterol (HDLC). We also investigated the potential interaction of the inflammatory marker C-reactive protein (CRP) and low HDLC in a subset of these patients.

**Key messages:**

- We describe distinct patterns of dyslipidaemia according to underlying heart disease aetiology: significantly decreased levels of HDLC, total cholesterol and low-density lipoprotein cholesterol in those with communicable heart disease (representing 43% of cohort) compared to those with non-communicable heart disease (57% of cohort).
- In adjusted analyses, low HDLC was more pronounced in those with communicable heart disease. In those with high CRP levels, we present novel data showing a sex-disparate relationship between CRP and low HDLC, with a strong relationship between high CRP and low HDLC in females only.
- The high prevalence of low HDLC in a relatively young population of urban Africans may, if persistent in the longer-term, confer greater risk of atherosclerotic heart disease

**Strengths and limitations of the study:**

- 1  
2  
3  
4  
5  
6  
7  
8  
9  
10  
11  
12  
13  
14  
15  
16  
17  
18  
19  
20  
21  
22  
23  
24  
25  
26  
27  
28  
29  
30  
31  
32  
33  
34  
35  
36  
37  
38  
39  
40  
41  
42  
43  
44  
45  
46  
47  
48  
49  
50  
51  
52  
53  
54  
55  
56  
57  
58  
59  
60
- We report a high prevalence of low HDLC in *de novo* presentations of [both](#) communicable heart disease [and](#) non-communicable heart disease, [with a greater prevalence in those with communicable heart disease](#).
  - The study cohort is clinically very well defined; however the lipid data were obtained according to clinical presentation, which may impose systematic bias to the results.
  - This hospital registry study has provided preliminary data that would support prospective investigation of longer-term dyslipidaemia patterns and their impact on heart disease incidence, both in South Africa and in other low-and-middle-income countries where the epidemiologic transition is currently underway.

## INTRODUCTION

Heart diseases with infectious aetiology have long been the principal forms of cardiovascular disease (CVD) in Sub-Saharan Africa. However, epidemiological transition has seen increased prevalence of non-communicable forms of heart disease in these populations[1]. This phenomenon is largely driven by complex, population-wide changes in demographic, social and economic status, with associated changes in lifestyle habits[2-4]. Indicative of the tension between 'old' and 'new' forms of heart disease, the incidence of communicable heart disease (HD) is sustained by the devastating epidemics of human immunodeficiency virus/acquired immune deficiency syndrome (HIV/AIDS), tuberculosis (TB), rheumatic heart disease (RHD) and parasitic infections with cardiac involvement[5-7], while in parallel, the prevalence of risk factors for non-communicable HD increases[8].

Low serum levels of high-density lipoprotein cholesterol (HDLC) are consistently and independently associated with increased risk of atherosclerotic forms of CVD[9 10]. However, it remains uncertain whether low HDLC is causal or just a cardiovascular risk marker[11]. [If we are to extrapolate from studies in Western and Asian populations](#)[12-14], [isolated low HDLC is associated with increased risk for CVD in the long-term](#). There are several causes of low HDLC levels, including overweight, obesity, tobacco smoking, and insulin resistance/type 2 diabetes mellitus, indicative of the important role lifestyle factors have in mediating HDLC levels[9]. Additionally, low HDLC is a striking consequence of abnormal lipid metabolism in infection and inflammation[15]. Although it has been shown that those of African descent largely show a favourable lipid profile [characterised by high HDLC levels](#) [16], [it is unlikely that they can](#) remain athero-protective during an infected state[15]. [Indeed](#), in this setting, it is probable that increasing prevalence of modifiable/ lifestyle risk factors contribute to a more advanced presentation in those with communicable HD[8]. We have previously reported that in the geographically compact townships that comprise Soweto in South Africa, 'old' and 'new' forms of HD are simultaneously present[8]. While this tension exists, we have a unique opportunity to explore lipid profiles in patients presenting with non-communicable versus communicable forms of HD.



## STUDY HYPOTHESES

Having shown important ethnic differences in the lipid profiles of patients of African descent presenting with HD in the urban African enclave of Soweto[16], we hypothesised that independent of age and sex, urban Africans presenting with communicable HD will demonstrate patterns of dyslipidaemia associated with infection/inflammation, particularly sub-optimal levels of HDLC, versus non-communicable HD.

## METHODS

### Study Setting & Design

As described in detail previously[8 17] the 3,500 bed Chris Hani Baragwanath Hospital (case load of > 125,000 in-patients per annum) services the tertiary care needs of Soweto (population of 1.1 million) and surrounding communities. All suspected cardiac presentations are referred to the hospital's Cardiology Unit for advanced diagnostic testing and gold-standard treatments. A prospective clinical registry of all *de novo* presentations of the same was established in 2006 as part of the Heart of Soweto Study and represents sub-Saharan Africa's largest and most detailed study of advanced forms of HD to date[17].

### Participants

The 'Heart of Soweto' cohort of *de novo* case presentations comprised 5328 patients. Of these, 2185 patients (40%) had a documented fasting lipid profile (serum total cholesterol (TC) level, triglyceride, HDLC and calculated low-density lipoprotein cholesterol (LDLC)[18] undertaken at Baragwanath Hospital on-site pathology). None of the patients were on lipid lowering agents at the time of presentation, as this medication can only be prescribed at the tertiary institution.

However some of the patients had been placed on anti-hypertensive medication prior to their first assessment at the Cardiac Clinic at Baragwanath Hospital. Moreover, only a small number of patients (39 cases) had been prescribed anti-retroviral therapy (ART) on presentation. The study was approved by the University of the Witwatersrand Ethical Committee and conforms to the principles outlined in the Declaration of Helsinki. All patients provided informed consent.

## Study Data

1  
2 A complete list of study data captured by the registry, comprising basic socio-demographic  
3 (including self-reported ethnicity, years of education and determining if the patient was born in  
4 Soweto) and advanced clinical profiling, has been described previously[8 17] The registry  
5 captured all advanced clinical investigative procedures (e.g. coronary angiography, which was  
6 undertaken in all people diagnosed with coronary artery disease (CAD)). Echocardiography  
7 (performed on all patients) criteria used in the study has been described in detail previously[8  
8 17].

## Case Classifications

9  
10 Adjudication and classification of communicable and non-communicable presentations of HD in  
11 this cohort have been previously described[8]. After exclusion of those with uncomplicated  
12 hypertension (i.e. without evidence of cardiac dysfunction, n=380) or other non-modifiable  
13 aetiologies (e.g. congenital disorders), 1199 patients of African descent (22% of the total 'Heart  
14 of Soweto' cohort) were included in this analysis. Contributory diagnoses for non-communicable  
15 HD were predominantly hypertensive heart failure (HT-HF) and coronary artery disease (without  
16 HIV). Communicable heart disease was predominantly classified as HIV-dilated cardiomyopathy  
17 (HIV-DCMO), HIV-pulmonary hypertension, TB pericardial disease, and pericarditis due to other  
18 infection.

## Risk factor definition

19  
20 Optimum lipid levels and treatment goals with established CVD were defined according to  
21 international guidelines[9] adopted by the Lipid and Atherosclerosis Society of South Africa and  
22 the South African Heart Association - high TC: >4.5 mmol/L, high TGs: >1.7 mmol/L, high LDLC:  
23 >2.5 mmol/L and low HDLC: <1.0 for males and <1.2 mmol/L for females[19]. Other risk factors  
24 were measured on a clinical basis, as previously described[17]. Anthropometric measurements  
25 were available for calculation of body mass index (BMI, kg/m<sup>2</sup>) in 854 (71%) cases, the low  
26 reporting rate restricted to ambulatory patients. Obesity was defined as BMI ≥ 30 kg/m<sup>2</sup>. Serum  
27 C-reactive protein (CRP) was measured in a sub-set of 367 patients (31% of all cases) if  
28 clinically indicated (e.g. suspected infection). Patients were stratified into clinically relevant CRP  
29  
30  
31  
32  
33  
34  
35  
36  
37  
38  
39  
40  
41  
42  
43  
44  
45  
46  
47  
48  
49  
50  
51  
52  
53  
54  
55  
56  
57  
58  
59  
60

1 categories[20], as defined by Dhingra and colleagues[21]. Patients with a CRP of 1 mg/L (n=19)  
2 were used as reference group and compared to medium (1.1-3.0 mg/L, n=26), high (3.1-10.0  
3 mg/L, n=83) and very high (>10.0 mg/L, n=239) CRP categories.  
4  
5

### 6 **Statistical analyses**

7  
8 Normally distributed continuous data are presented as the mean  $\pm$  standard deviation and non-  
9 Gaussian distributed variables as the median (inter-quartile range). Categorical data are  
10 presented as sample number and percentages. For group comparisons, we initially used Chi  
11 Square ( $\chi^2$ ) analysis with calculation of odds ratios (OR) with 95% confidence intervals (CI)  
12 presented where appropriate for discrete variables, and independent T-tests for normally  
13 distributed continuous variables and Mann-Whitney U test for nonparametric continuous  
14 variables. Multiple logistic regression analyses (entry model) were used to derive age and sex  
15 adjusted ORs (and BMI in some analyses, as described) for the risk of presenting with clinically  
16 relevant variables (primarily dyslipidaemia profiles), according to CD HD relative to NCD  
17 diagnosis. Significance was accepted at the two-sided level of  $p < 0.05$ .  
18  
19  
20  
21  
22  
23  
24  
25  
26  
27  
28  
29  
30  
31  
32  
33  
34  
35  
36  
37  
38  
39  
40  
41  
42  
43  
44  
45  
46  
47  
48  
49  
50  
51  
52  
53  
54  
55  
56  
57  
58  
59  
60

## RESULTS

## Clinical and Demographic Profile

Table 1 shows the socio-demographic and clinical profile of this cohort according to cardiac aetiology. Those presenting with non-communicable HD (n=678, 56.5% of cohort) were older and had higher BMI and mean SBP and DBP than those with communicable HD (n=521, 43.5%; all comparisons p<0.001). Overall, 76 (6%) were confirmed HIV-positive: 15 (2%) and 61 (12%) patients were confirmed HIV-positive in non-communicable and communicable HD groups respectively (P<0.001). Apart from higher BMIs in women (30.6 ± 6.9 vs. 26.7 ± 5.5 kg/m<sup>2</sup> in males, p<0.001) there were no significant differences between sexes in respect to other clinical parameters. To this, the prevalence of obesity in women was 50% as compared to men (26%), P<0.001.

**TABLE 1 Clinical and demographic profile according to heart disease aetiology**

|                                              | <u>ALL Cases</u><br>n=1199 | <u>Non-communicable</u><br>n=678 (57%) | <u>Communicable</u><br>n=521 (43%) | <u>P value</u>   |
|----------------------------------------------|----------------------------|----------------------------------------|------------------------------------|------------------|
| <b><u>Demographic Profile</u></b>            |                            |                                        |                                    |                  |
| <b><u>Mean age (years)</u></b>               | <u>58.3 ± 14.0</u>         | <u>60.1 ± 13.1</u>                     | <u>55.9 ± 14.9</u>                 | <u>&lt;0.001</u> |
| <b><u>Female</u></b>                         | <u>701 (59%)</u>           | <u>403 (59%)</u>                       | <u>298 (57%)</u>                   | <u>0.44</u>      |
| <b><u>&lt;6 years formal education</u></b>   | <u>582 (49%)</u>           | <u>335 (49%)</u>                       | <u>247 (47%)</u>                   | <u>0.52</u>      |
| <b><u>Soweto origin</u></b>                  | <u>562 (47%)</u>           | <u>327 (48%)</u>                       | <u>235 (45%)</u>                   | <u>0.29</u>      |
| <b><u>Clinical Presentation</u></b>          |                            |                                        |                                    |                  |
| <b><u>Total cholesterol (mmol/L)</u></b>     | <u>4.0 ± 1.4</u>           | <u>4.3 ± 1.3</u>                       | <u>3.7 ± 1.2</u>                   | <u>&lt;0.001</u> |
| <b><u>HDLC (mmol/L)</u></b>                  | <u>1.1 ± 0.5</u>           | <u>1.2 ± 0.5</u>                       | <u>1.0 ± 0.5</u>                   | <u>&lt;0.001</u> |
| <b><u>Median triglycerides (mmol/L)*</u></b> | <u>1.1 (0.8, 1.5)</u>      | <u>1.1 (0.8, 1.6)</u>                  | <u>1.0 (0.7, 1.3)</u>              | <u>&lt;0.001</u> |
| <b><u>LDLC (mmol/L)</u></b>                  | <u>2.4 ± 1.0</u>           | <u>2.5 ± 1.0</u>                       | <u>2.2 ± 0.9</u>                   | <u>&lt;0.001</u> |
| <b><u>TC:HDLC ratio</u></b>                  | <u>4.3 ± 3.0</u>           | <u>4.2 ± 3.1</u>                       | <u>4.4 ± 2.7</u>                   | <u>0.27</u>      |
| <b><u>LDL:HDLC ratio</u></b>                 | <u>2.5 ± 1.1</u>           | <u>2.5 ± 1.0</u>                       | <u>2.7 ± 1.1</u>                   | <u>0.36</u>      |
| <b><u>TG:HDLC ratio*</u></b>                 | <u>1.1 (0.7, 1.7)</u>      | <u>1.0 (0.7, 1.7)</u>                  | <u>1.1 (0.7, 1.8)</u>              | <u>0.12</u>      |
| <b><u>Median serum CRP (mg/L)*</u></b>       | <u>19 (7.0, 45.0)</u>      | <u>16.8 (6.6, 41.5)</u>                | <u>20.5 (7.8, 55.9)</u>            | <u>0.25</u>      |

|                                                                  |                   |                   |                   |                  |
|------------------------------------------------------------------|-------------------|-------------------|-------------------|------------------|
| <b>Systolic BP (mmHg)</b>                                        | <u>135 ± 29</u>   | <u>143 ± 29</u>   | <u>126 ± 26</u>   | <u>&lt;0.001</u> |
| <b>Diastolic BP (mmHg)</b>                                       | <u>78 ± 16</u>    | <u>80 ± 16</u>    | <u>74 ± 16</u>    | <u>&lt;0.001</u> |
| <b>BMI (kg/m<sup>2</sup>)</b>                                    | <u>29.0 ± 6.7</u> | <u>30.3 ± 6.7</u> | <u>27.2 ± 6.2</u> | <u>&lt;0.001</u> |
| <b><u>Prevalence of dyslipidaemia (n, %)</u></b>                 |                   |                   |                   |                  |
| <b>High total cholesterol (&gt; 5mmol/L)</b>                     | <u>378 (32%)</u>  | <u>266 (39%)</u>  | <u>112 (22%)</u>  | <u>&lt;0.001</u> |
| <b>Low HDLC (&lt; 1 in males and &lt; 1.2 mmol/L in females)</b> | <u>694 (58%)</u>  | <u>344 (51%)</u>  | <u>350 (67%)</u>  | <u>&lt;0.001</u> |
| <b>High LDLC (&gt; 2.5 mmol/L)</b>                               | <u>446 (37%)</u>  | <u>291 (43%)</u>  | <u>155 (30%)</u>  | <u>&lt;0.001</u> |
| <b>High triglycerides (&gt; 1.7 mmol/l)</b>                      | <u>215 (18%)</u>  | <u>143 (21%)</u>  | <u>72 (14%)</u>   | <u>0.001</u>     |
| <b><u>Prevalence of other risk factors (n, %)</u></b>            |                   |                   |                   |                  |
| <b>Obese (BMI &gt;30 kg/m<sup>2</sup>)</b>                       | <u>344 (40%)</u>  | <u>237 (48%)</u>  | <u>107 (30%)</u>  | <u>&lt;0.001</u> |
| <b>Type 2 diabetes</b>                                           | <u>98 (8%)</u>    | <u>71 (11%)</u>   | <u>27 (5%)</u>    | <u>&lt;0.001</u> |
| <b>Past or current smoker</b>                                    | <u>566 (47%)</u>  | <u>321(47%)</u>   | <u>245 (47%)</u>  | <u>0.95</u>      |
| <b>Family history of CVD</b>                                     | <u>466 (39%)</u>  | <u>286 (42%)</u>  | <u>180 (35%)</u>  | <u>0.01</u>      |
| <b>Confirmed HIV-positive cases</b>                              | <u>76 (6%)</u>    | <u>15 (2%)</u>    | <u>61 (12%)</u>   | <u>&lt;0.001</u> |

**Table legend:**

LDLC = low-density lipoprotein cholesterol; HDLC = high-density lipoprotein cholesterol; TG = triglycerides; BMI = body mass index (available in 854 cases); CRP = C-reactive protein (available in 367 cases); CVD = cardiovascular disease; HIV = human immunodeficiency virus.

\*Median (interquartile range) values presented, differences tested by Mann-Whitney U test

**Aetiology of heart disease (primary diagnosis)**

Overall, the most prevalent primary diagnoses were HT-HF (n=461, 38%), dilated cardiomyopathy (DCMO, n= 178, 15%) and CAD (n=157, 12%). In those classified as non-communicable HD, HT-HF was the main primary diagnosis (n=461, 68%), along with CAD (without concurrent HIV-infection; n=157, 23%). Dilated cardiomyopathy (n=178, 34%), right heart failure (n=92, 18%) and right heart disease (n=63, 12%) and other forms of primary valve

1 disease (n=71, 14%), were the most common diagnoses in those classified with communicable  
2 forms of HD.  
3

#### 4 **Lipid Profiles**

5 Those with communicable HD had significantly lower TC, LDLC, and HDLC compared with  
6 patients with non-communicable HD (Table 1 and Figure 1, p<0.001 for all comparisons).  
7

8 Overall, women had significantly higher TC ( $4.2\pm 1.3$  mmol/L vs.  $3.8\pm 1.2$  mmol/L,  $p<0.001$ );  
9 LDLC ( $2.4\pm 1.0$  mmol/L vs.  $2.2\pm 1.0$  mmol/L,  $p<0.01$ ), and HDLC compared to men ( $1.2\pm 0.5$   
10 mmol/L vs.  $1.0\pm 0.5$  mmol/L,  $p<0.001$ ). This gender difference did not extend to triglycerides  
11 ( $1.1(0.4-1.8)$  mmol/L vs.  $1.1(0.4-1.8)$ ,  $p=0.7$ ) nor TC:HDLC ratio ( $4.2 \pm 3.1$  mmol/L vs.  $4.3 \pm 2.7$   
12 mmol/L,  $p=0.6$ ). Lipid ratios were calculated and compared (Table 1). There was no significant  
13 differences between aetiology groups for either TC:HDL or TG:HDL groups. However LDL:HDL  
14 ratios were significantly higher in the communicable group.  
15

16 Levels of TC (Figure 1A), HDLC (Figure 1B) and LDLC (Figure 1C) were significantly higher in  
17 females with non-communicable HD (Figure 1). However in those diagnosed with  
18 communicable HD, small, but significant, differences were observed only for TC and HDLC, not  
19 LDL (Figure 1). Overall, prevalence of dyslipidaemia varied from 18% of patients with high  
20 triglycerides to 58% with low HDLC (Table 1 and Figure 2). Consistent with the decrease  
21 observed with the actual levels, prevalence of high TC and high LDLC was increased in those  
22 with non-communicable HD aetiologies while low HDLC levels prevalence was higher in those  
23 with communicable HD (Table 1 and Figure 2). There were no patients with TG levels > 4.5  
24 mmol/L (range 0.1-3.8 mmol/L) which makes use of the Friedewald equation suitable for this  
25 cohort[18].  
26

27 **Table 2** shows independent associations between relevant socio-economic, demographic and  
28 clinical variables and communicable HD aetiology, relative to those presenting with non-  
29 communicable HD. The effect of HD aetiology on low HDLC dyslipidaemia was strong and  
30 consistent: adjusting for age, sex and BMI of patients, those with forms of communicable HD  
31 were significantly more likely to record a low HDLC relative to those presenting with non-  
32 communicable HD (Table 2,  $p<0.001$ ) and less likely to record high TC and LDLC (Table 2).  
33  
34  
35  
36  
37  
38  
39  
40  
41  
42  
43  
44  
45  
46  
47  
48  
49  
50  
51  
52  
53  
54  
55  
56  
57  
58  
59  
60

Patients with communicable HD were less likely to record high triglyceride levels (OR 0.65, 95%CI 0.51, 0.84,  $p < 0.05$ ) compared to those with non-communicable HD.

**TABLE 2** Independent correlates of communicable heart disease, relative to non-communicable heart disease

|                                          | Communicable disease |               |
|------------------------------------------|----------------------|---------------|
|                                          | Odds Ratio           | 95% CI        |
| Female sex                               | 0.91                 | 0.72, 1.15    |
| Age                                      | 0.98                 | 0.97, 0.99**  |
| Obesity                                  | 0.50                 | 0.37, 0.68*** |
| < 6 years formal education               | 1.11                 | 0.88, 1.42    |
| Soweto origin                            | 0.98                 | 0.77, 1.24    |
| <b>Body mass index adjusted analysis</b> |                      |               |
| High TC                                  | 0.52                 | 0.37, 0.71*** |
| High LDLC                                | 0.56                 | 0.41, 0.76*** |
| Low HDLC                                 | 1.91                 | 1.42, 2.57*** |
| High TG                                  | 0.65                 | 0.51, 0.84*   |

Table legend:

Obesity BMI  $> 30 \text{ kg/m}^2$ ; High total cholesterol (TC)  $> 4.5 \text{ mmol/L}$ ; High low density lipoprotein (LDLC)  $> 2.5 \text{ mmol/L}$ ; Low high density lipoprotein (HDLC) ( $< 1.0 \text{ mmol/L}$  in males,  $< 1.2 \text{ mmol/L}$  in females). OR = odds ratio; CI = confidence intervals. Age and sex-adjusted analysis: \*  $p < 0.05$ ; \*\* $p < 0.01$ ; \*\*\* $p < 0.001$ .

**CRP subset analysis**

Overall, there was no significant difference in CRP levels between aetiology groups (**Table 1**). The proportion of confirmed HIV cases in this CRP subset analysis was 7% ( $n=27$ ). Of those, 23 were in the very high-risk category. There was also no association between CRP-derived risk categories and high TC, LDLC or triglycerides (data not shown). However the risk of having low HDLC increased with increasing CRP levels. In age and sex-adjusted analyses, those with

1 medium risk (OR 2.73, 95% CI 0.68, 10.89, P=0.16), high risk (OR 4.98, 95% CI 1.46, 17.00,  
2 P=0.01) and very high risk (OR 6.37, 95% CI 1.97, 20.57, p<0.01) CRP levels were significantly  
3 more likely to record a low HDLC relative to those in the low risk CRP group. Also, when  
4 stratified by sex, a strong, positive association remained in females but was no longer apparent  
5 in males (**Figure 3**). In females, the pattern was significant across all CRP risk categories:  
6 compared to low risk, those with medium risk (OR 12.1, 95% CI 1.21, 120, p=0.03), high risk  
7 (OR 14.4, 95% CI 1.64, 126, p=0.02) and very high risk (OR 23.5, 95% CI 2.81, 197, p=0.004)  
8 CRP levels were all more likely to record a low HDLC. Moreover, the association was not  
9 weakened by addition of BMI into the model (BMI and CRP measurements available in only 230  
10 cases) in overall and female-only (n=133) models: those with medium risk (OR 20.5, 95% CI  
11 1.72, 246, p=0.02), high risk (OR 10.6, 95% CI 1.14, 98.8, p=0.04) and very high risk (OR 21.0,  
12 95% CI 2.38, 185, p<0.01) CRP levels were all more likely to record a low HDLC.  
13  
14  
15  
16  
17  
18  
19  
20  
21  
22  
23  
24  
25  
26  
27  
28  
29  
30  
31  
32  
33  
34  
35  
36  
37  
38  
39  
40  
41  
42  
43  
44  
45  
46  
47  
48  
49  
50  
51  
52  
53  
54  
55  
56  
57  
58  
59  
60



## DISCUSSION

1  
2 We report significant decreases in lipid levels (TC, HDLC and LDLC) and age and BMI  
3 according to non-communicable and communicable manifestations of *de novo* HD in urban  
4 Africans, patterns that were observed in both sexes. The high prevalence of low HDLC in more  
5 than half of all cases, but much higher in those with communicable HD, is most striking. Also, it  
6 appears that gender is an effect modifier in the relationship between CRP and low HDLC in this  
7 cohort, but, importantly, the relationship remains even after adjustment for the significant  
8 confounder of adiposity.  
9

10  
11 While traditionally uncommon[22], dyslipidaemia, in particular low HDLC, is becoming  
12 more prevalent in sub-Saharan Africa[23]. [The low lipid levels present in the majority of cases](#)  
13 [with communicable HD reflects the dramatic changes to lipid metabolism observed in infection](#)  
14 [and is therefore, anticipated. We acknowledge that atherogenic LDLC is also low in this setting](#)  
15 [and that low HDLC may not be indicative of particularly increased disease risk, at least in the](#)  
16 [short-term. However, we still deem this as highly clinically relevant given that even isolated low](#)  
17 [HDLC is associated with a higher risk of atherosclerotic forms of HD, a finding that has been](#)  
18 [seen in diverse populations](#)[12-14]. Interestingly triglyceride levels were not significantly  
19 increased in those with communicable forms of HD, despite evidence that it can increase as  
20 part of the infectious/inflammatory metabolic milieu[15]. [Additionally, we speculate that the](#)  
21 [higher lipid levels in women may be the result of much higher rates of obesity \(50% compared](#)  
22 [with 26% in men\) as the driver of elevated total cholesterol, which has been suggested by](#)  
23 [authors of a worldwide systematic analysis on high TC](#) [24].  
24  
25  
26  
27  
28  
29  
30  
31  
32  
33  
34  
35  
36  
37  
38  
39  
40  
41  
42  
43  
44  
45

46 Our interest in this phenomenon predominantly relates to the longer-term effects of low  
47 HDLC, especially when observed together with the amplified vascular risk associated with  
48 chronic infection[15]. In Africa, where acute coronary syndromes are seen in a relatively young  
49 population[25], we predict the very high rates of myriad communicable disease[26 27] will result  
50 in more complex cases, with potentially poorer outcomes in the long-term, given the critical role  
51 of HDLC in both innate and adaptive immunity[15]. While many infectious diseases (bacterial  
52 and viral) have contributed to the underlying pathology of HD reported here[5], dyslipidemia  
53  
54  
55  
56  
57  
58  
59  
60

1 associated with HIV infection has been particularly well studied. HIV-related low HDLC is likely a  
2 consequence of both the viral infection and an adverse effect of some anti-retroviral treatment  
3 regimens[27-30], however only 39 patients of the 76 (51%) confirmed HIV-positive were on ART  
4 at time of presentation, representing 3% of entire subset sample, which possibly dilutes this  
5 effect.  
6  
7  
8  
9

10 Our CRP subset analysis found associations between low HDLC and the pro-  
11 inflammatory marker CRP in patients with newly diagnosed HD in a sex disparate manner, with  
12 a much stronger positive association in females. Median CRP levels were also very high across  
13 all categories of HD aetiology, and are much higher than previous reports in both early analyses  
14 of large cohorts[20] as well as South African studies[31], but reflect the clinical requirements at  
15 presentation. These high levels may also be the result of 'multi-morbidity' observed in the  
16 cohort, given the prevalence of infectious disease (such as HIV/AIDS) as well as other lifestyle  
17 factors that can also influence CRP levels[32]; all of which may have contributed to the high  
18 levels observed. Inflammatory stress may be having a more adverse effect on HDLC in women  
19 compared to men as a result of many causes. The prognostic value of stratifying CVD risk, even  
20 at very high CRP (>10 mg/L) levels, has been demonstrated in a very large female cohort[20],  
21 and there are reports of elevated CRP in female populations of African descent[33]. We also  
22 report females as having a significantly higher BMI; obesity itself can induce a low-grade  
23 inflammatory response, however the association between low HDLC and CRP in women  
24 remained even after adjusting for BMI. While we have assumed that the exaggerated drop in  
25 HDLC in women with acute forms of communicable HD is a consequence rather than a cause of  
26 infection, treatment of atherogenic dyslipidaemia and inflammatory markers in women are of  
27 particular clinical relevance in a setting where obesity and its antecedent behaviours are  
28 increasing.  
29  
30  
31  
32  
33  
34  
35  
36  
37  
38  
39  
40  
41  
42  
43  
44  
45  
46  
47  
48  
49  
50  
51

52 These results underscore the need to consider multifactorial CVD risk burden that  
53 recognises that co-occurrence of infectious and non-communicable disease produces significant  
54 and complex health disparities. Certainly, the clinical strategies to protect the heart and vessels  
55 in acute infection differ from those required in chronic infection and it is unlikely that lipid  
56  
57  
58  
59  
60

1 measurements will form a cornerstone of treatment in such cases. However, it is important to  
2 recognise the benefits of early detection and treatment of dyslipidaemia in order to mitigate any  
3 double effect of infectious *and* 'lifestyle' HD risk factors in the longer term. While the  
4 epidemiological evidence is clear, the precise mechanism by which HDLC decreases  
5 atherosclerotic CVD risk remains unclear[11]; indeed, efforts to develop pharmacological  
6 modalities to specifically increase HDLC levels to reduce cardiovascular risk, continues to be  
7 problematic[10] and we acknowledge that addressing the low HDLC observed in this cohort, in  
8 isolation, without commensurate improvements in HDLC functionality, will prove a difficult task.  
9 This does not, however, preclude use of other therapeutic interventions that address the  
10 greater, more complex risk presentation of cases that fall in the 'crossover' between  
11 communicable and non-communicable diseases. For example, the polypill, which includes lipid-  
12 lowering medications, has been proposed as a viable treatment option in secondary prevention,  
13 given its relative ease of use and efficacy in low-income settings[34]. More so, evidence that  
14 statins also exert immunomodulatory effects, along with suggestions they may prove useful in  
15 the treatment and prevention of infections[35], indicate they may have important, multi-faceted  
16 clinical implications in populations such as Soweto, especially given the substantial  
17 dyslipidaemic risk associated with highly-prevalent HIV infection and ART. Attempts to address  
18 prevention, management, cure and control of non-communicable and communicable forms of  
19 HD as entirely separate entities are likely to prove insufficient. This holds true on a per-patient  
20 basis as well as for any population-wide, public health approaches.

21  
22  
23  
24  
25  
26  
27  
28  
29  
30  
31  
32  
33  
34  
35  
36  
37  
38  
39  
40  
41  
42  
43  
44  
45  
46  
47  
48  
49  
50  
51  
52  
53  
54  
55  
56  
57  
58  
59  
60  
There are a number of limitations that require consideration. Clinical data (other than routine echocardiography and 12-lead ECG) were obtained according to presentation. This study was not specifically designed to comprehensively delineate between specific forms of HD (resulting in variable clinical data) although this is part of clinical investigation at Baragwanath Hospital; although it should be noted HIV status is not routinely determined. The arbitrary selection of disease states into the communicable versus non-communicable groups (e.g. primary valve disease) may be questioned; hence our further delineation of clearly identifiable cases of acute inflammation/infection at the point of admission. However, we would emphasise

1 that classification was prospectively applied, the groupings are consistent with our previous  
2 reports that describe in detail the rigorous clinical criteria employed in profiling the 'Heart of  
3 Soweto' cohort, and expected gradients in lipid levels were subsequently found. Systematic bias  
4 needs to be carefully considered before attributing broad patterns in lipid profiles, as those with  
5 suspected atherosclerotic disease were more likely to have had lipid levels measured, reflecting  
6 the low number of those presenting an acute infectious form of HD (for example, patients with  
7 pericarditis). Adiposity, a major confounder of both dyslipidaemia and HD, was recorded in 71%  
8 of the cohort. However, its inclusion in the regression analyses did not alter the significance of  
9 the associations. Central obesity measurements (e.g. waist-to-hip ratio) may have offered  
10 greater delineation of CVD risk but data were not available. CRP was measured in just under  
11 one third of cases and related data requires careful interpretation. Finally, [owing to the cross-](#)  
12 [sectional design of this study](#) we were not able to investigate the possible effect of the  
13 magnitude and timing of the contributing infection on lipid levels, beyond the data collected at  
14 admission. Given the transient, dynamic processes of lipid metabolism over the course of acute  
15 and chronic diseases, only longitudinal studies of lipid levels and subsequent outcomes can fully  
16 elucidate the clinical importance of our findings.

## 35 Conclusions

36 We have shown that despite largely favourable lipid profiles, there are clear differences  
37 according to underlying aetiology of HD in urban Africans [however, overall low HDLC was the](#)  
38 [most prevalent metabolic abnormality observed in this cohort](#). Younger Africans with  
39 communicable HD have particularly low levels of HDLC that, if maintained in the longer term,  
40 may leave them at increased risk of atherosclerotic disease. [This is physiologically plausible in](#)  
41 [chronic infection; however low HDL at hospital admission could also simply reflect similarly low](#)  
42 [levels of TC/LDL and may not be indicative of increased long-term CVD risk. That uncertainty](#)  
43 [can only be resolved by well-powered studies with adequate follow-up, to provide sufficient](#)  
44 [evidence to address current gaps in evidence and, ultimately, guide clinical practice.](#)  
45 [Nevertheless if](#) proven, targeted prevention programs that identify and actively manage  
46 individuals with a history of [communicable HD](#) (particularly an active case) and with low levels of

1 HDLC may be indicated. The alternative is an increasing burden of non-communicable forms of  
2 HD in urban African communities that is supplemented (in origin and confluence) by historical  
3 cases of communicable disease that have adversely affected protective HDLC levels  
4 (particularly in women).  
5  
6  
7  
8  
9  
10  
11  
12  
13  
14  
15  
16  
17  
18  
19  
20  
21  
22  
23  
24  
25  
26  
27  
28  
29  
30  
31  
32  
33  
34  
35  
36  
37  
38  
39  
40  
41  
42  
43  
44  
45  
46  
47  
48  
49  
50  
51  
52  
53  
54  
55  
56  
57  
58  
59  
60

For peer review only

## Acknowledgements

We thank all the doctors, nurses, and patients who participated in the registry; and Elisabeth Tshele, Bridget Phooko, Maureen Kubheka and Phutuma Mathusi who contributed to the meticulous collection and management of clinical data.

## Competing interests

All authors declare: all authors had financial support from independent funding bodies, including University of the Witwatersrand and unconditional research grants from Adcock-Ingram, the Medtronic Foundation USA, Servier, Bayer-Schering and BHP Billiton, for the submitted work; no financial relationships with any organisations that might have an interest in the submitted work in the previous 3 years; no other relationships or activities that could appear to have influenced the submitted work.

## Funding

The 'Heart of Soweto Study' registry was supported by the University of the Witwatersrand and unconditional research grants from Adcock-Ingram, the Medtronic Foundation USA, Servier, Bayer-Schering and BHP Billiton. SS, MJC and JGL are supported by the National Health & Medical Research Council of Australia [Program Grants 320860 and 631947 and Postgraduate scholarship 586739]. JGL is supported by the National Heart Foundation of Australia and Cardiac Society of Australia and New Zealand. Baker IDI is supported by the Victorian Government's Operational Infrastructure Support Program. KS and SL are supported by the MRC South Africa and the University of Cape Town.

## Author's contributions:

KS, MJC and SS participated in the original design of the study and supervised the collection of data. JGL prepared the first draft of the manuscript, with edits and revisions provided by all authors. FR and FT revised manuscript critically for important intellectual content. All authors

1 had full access to all the data and read and approved the final version of the manuscript. All  
2 authors had final responsibility for the decision to submit the manuscript for publication.  
3  
4  
5

### 6 **Data sharing statement**

7  
8 Study data will be available on request from the corresponding author.  
9  
10  
11  
12  
13  
14  
15  
16  
17  
18  
19  
20  
21  
22  
23  
24  
25  
26  
27  
28  
29  
30  
31  
32  
33  
34  
35  
36  
37  
38  
39  
40  
41  
42  
43  
44  
45  
46  
47  
48  
49  
50  
51  
52  
53  
54  
55  
56  
57  
58  
59  
60

For peer review only

## REFERENCES:

1. Yusuf S, Reddy S, Ounpuu S, Anand S. Global burden of cardiovascular diseases: Part II: variations in cardiovascular disease by specific ethnic groups and geographic regions and prevention strategies. *Circulation* 2001;**104**(23):2855-64
2. Vorster HH. The emergence of cardiovascular disease during urbanisation of Africans. *Public Health Nutr* 2002;**5**(1A):239-43
3. Mensah GA. Descriptive epidemiology of cardiovascular risk factors and diabetes in sub-Saharan Africa. *Progress in cardiovascular diseases* 2013;**56**(3):240-50 doi: 10.1016/j.pcad.2013.10.014[published Online First: Epub Date]].
4. Danaei G, Singh GM, Paciorek CJ, et al. The global cardiovascular risk transition: associations of four metabolic risk factors with national income, urbanization, and Western diet in 1980 and 2008. *Circulation* 2013;**127**(14):1493-502, 502e1-8 doi: 10.1161/CIRCULATIONAHA.113.001470[published Online First: Epub Date]].
5. Mocumbi AO, Sliwa K. Women's cardiovascular health in Africa. *Heart* 2012;**98**(6):450-5 doi: 10.1136/heartjnl-2011-301025[published Online First: Epub Date]].
6. Thienemann F, Sliwa K, Rockstroh JK. HIV and the heart: the impact of antiretroviral therapy: a global perspective. *Eur Heart J* 2013;**34**(46):3538-46 doi: 10.1093/eurheartj/eh388[published Online First: Epub Date]].
7. Sliwa K, Carrington MJ, Becker A, Thienemann F, Ntsekhe M, Stewart S. Contribution of the human immunodeficiency virus/acquired immunodeficiency syndrome epidemic to de novo presentations of heart disease in the Heart of Soweto Study cohort. *Eur Heart J* 2012;**33**(7):866-74 doi: 10.1093/eurheartj/ehr398[published Online First: Epub Date]].
8. Stewart S, Carrington M, Pretorius S, Methusi P, Sliwa K. Standing at the crossroads between new and historically prevalent heart disease: effects of migration and socio-economic factors in the Heart of Soweto cohort study. *Eur Heart J* 2011;**32**(4):492-9 doi: 10.1093/eurheartj/ehq439[published Online First: Epub Date]].
9. Chapman MJ, Ginsberg HN, Amarenco P, et al. Triglyceride-rich lipoproteins and high-density lipoprotein cholesterol in patients at high risk of cardiovascular disease: evidence and guidance for management. *Eur Heart J* 2011;**32**(11):1345-61 doi: 10.1093/eurheartj/ehr112[published Online First: Epub Date]].
10. Libby P, Ridker PM, Hansson GK. Progress and challenges in translating the biology of atherosclerosis. *Nature* 2011;**473**(7347):317-25 doi: 10.1038/nature10146[published Online First: Epub Date]].
11. Voight BF, Peloso GM, Orho-Melander M, et al. Plasma HDL cholesterol and risk of myocardial infarction: a mendelian randomisation study. *Lancet* 2012;**380**(9841):572-80 doi: 10.1016/S0140-6736(12)60312-2[published Online First: Epub Date]].
12. Huxley RR, Barzi F, Lam TH, et al. Isolated low levels of high-density lipoprotein cholesterol are associated with an increased risk of coronary heart disease: an individual participant data meta-analysis of 23 studies in the Asia-Pacific region. *Circulation* 2011;**124**(19):2056-64 doi: 10.1161/CIRCULATIONAHA.111.028373[published Online First: Epub Date]].
13. Goldbourt U, Yaari S, Medalie JH. Isolated low HDL cholesterol as a risk factor for coronary heart disease mortality. A 21-year follow-up of 8000 men. *Arteriosclerosis, thrombosis, and vascular biology* 1997;**17**(1):107-13
14. deGoma EM, Leeper NJ, Heidenreich PA. Clinical significance of high-density lipoprotein cholesterol in patients with low low-density lipoprotein cholesterol. *Journal of the American College of Cardiology* 2008;**51**(1):49-55 doi: 10.1016/j.jacc.2007.07.086[published Online First: Epub Date]].
15. Khovidhunkit W, Kim MS, Memon RA, et al. Effects of infection and inflammation on lipid and lipoprotein metabolism: mechanisms and consequences to the host. *J Lipid Res*



- 2004;**45**(7):1169-96 doi: 10.1194/jlr.R300019-JLR200[published Online First: Epub Date]].
16. Sliwa K, Lyons JG, Carrington MJ, et al. Different lipid profiles according to ethnicity in the Heart of Soweto study cohort of de novo presentations of heart disease. *Cardiovasc J Afr* 2012;**23**(7):389-95 doi: 10.5830/CVJA-2012-036[published Online First: Epub Date]].
  17. Sliwa K, Wilkinson D, Hansen C, et al. Spectrum of heart disease and risk factors in a black urban population in South Africa (the Heart of Soweto Study): a cohort study. *Lancet* 2008;**371**(9616):915-22 doi: 10.1016/S0140-6736(08)60417-1[published Online First: Epub Date]].
  18. Friedewald WT, Levy RI, Fredrickson DS. Estimation of the concentration of low-density lipoprotein cholesterol in plasma, without use of the preparative ultracentrifuge. *Clinical chemistry* 1972;**18**(6):499-502
  19. Klug E. South African dyslipidaemia guideline consensus statement. *S Afr Med J* 2012;**102**(3 Pt 2):178-87
  20. Ridker PM, Cook N. Clinical usefulness of very high and very low levels of C-reactive protein across the full range of Framingham Risk Scores. *Circulation* 2004;**109**(16):1955-9 doi: 10.1161/01.CIR.0000125690.80303.A8[published Online First: Epub Date]].
  21. Dhingra R, Gona P, Nam BH, et al. C-reactive protein, inflammatory conditions, and cardiovascular disease risk. *Am J Med* 2007;**120**(12):1054-62 doi: 10.1016/j.amjmed.2007.08.037[published Online First: Epub Date]].
  22. Zoratti R. A review on ethnic differences in plasma triglycerides and high-density-lipoprotein cholesterol: is the lipid pattern the key factor for the low coronary heart disease rate in people of African origin? *Eur J Epidemiol* 1998;**14**(1):9-21
  23. Ulasi, II, Ijoma CK, Onodugo OD. A community-based study of hypertension and cardio-metabolic syndrome in semi-urban and rural communities in Nigeria. *BMC Health Serv Res* 2010;**10**:71 doi: 10.1186/1472-6963-10-71[published Online First: Epub Date]].
  24. Farzadfar F, Finucane MM, Danaei G, et al. National, regional, and global trends in serum total cholesterol since 1980: systematic analysis of health examination surveys and epidemiological studies with 321 country-years and 3.0 million participants. *Lancet* 2011;**377**(9765):578-86 doi: 10.1016/S0140-6736(10)62038-7[published Online First: Epub Date]].
  25. Steyn K, Sliwa K, Hawken S, et al. Risk factors associated with myocardial infarction in Africa: the INTERHEART Africa study. *Circulation* 2005;**112**(23):3554-61 doi: 10.1161/CIRCULATIONAHA.105.563452[published Online First: Epub Date]].
  26. Tollman SM, Kahn K, Sartorius B, Collinson MA, Clark SJ, Garenne ML. Implications of mortality transition for primary health care in rural South Africa: a population-based surveillance study. *Lancet* 2008;**372**(9642):893-901 doi: 10.1016/S0140-6736(08)61399-9[published Online First: Epub Date]].
  27. Adewole OO, Eze S, Betiku Y, et al. Lipid profile in HIV/AIDS patients in Nigeria. *Afr Health Sci* 2010;**10**(2):144-9
  28. Anastos K, Ndamage F, Lu D, et al. Lipoprotein levels and cardiovascular risk in HIV-infected and uninfected Rwandan women. *AIDS Res Ther* 2010;**7**:34 doi: 10.1186/1742-6405-7-34[published Online First: Epub Date]].
  29. Armstrong C, Liu E, Okuma J, et al. Dyslipidemia in an HIV-positive antiretroviral treatment-naive population in Dar es Salaam, Tanzania. *J Acquir Immune Defic Syndr* 2011;**57**(2):141-5 doi: 10.1097/QAI.0b013e318219a3d1[published Online First: Epub Date]].
  30. Buchacz K, Weidle PJ, Moore D, et al. Changes in lipid profile over 24 months among adults on first-line highly active antiretroviral therapy in the home-based AIDS care program in rural Uganda. *J Acquir Immune Defic Syndr* 2008;**47**(3):304-11

- 1  
2  
3  
4  
5  
6  
7  
8  
9  
10  
11  
12  
13  
14  
15  
16  
17  
18  
19  
20  
21  
22  
23  
24  
25  
26  
27  
28  
29  
30  
31  
32  
33  
34  
35  
36  
37  
38  
39  
40  
41  
42  
43  
44  
45  
46  
47  
48  
49  
50  
51  
52  
53  
54  
55  
56  
57  
58  
59  
60
31. Ntyintyane L, Panz V, Raal FJ, Gill G. Leptin, adiponectin, and high-sensitivity C-reactive protein in relation to the metabolic syndrome in urban South African blacks with and without coronary artery disease. *Metab Syndr Relat Disord* 2009;**7**(3):243-8
  32. Nordestgaard BG. Does elevated C-reactive protein cause human atherothrombosis? Novel insights from genetics, intervention trials, and elsewhere. *Curr Opin Lipidol* 2009;**20**(5):393-401 doi: 10.1097/MOL.0b013e3283307bfe[published Online First: Epub Date]].
  33. Albert MA, Glynn RJ, Buring J, Ridker PM. C-reactive protein levels among women of various ethnic groups living in the United States (from the Women's Health Study). *Am J Cardiol* 2004;**93**(10):1238-42 doi: 10.1016/j.amjcard.2004.01.067[published Online First: Epub Date]].
  34. Yusuf S, Islam S, Chow CK, et al. Use of secondary prevention drugs for cardiovascular disease in the community in high-income, middle-income, and low-income countries (the PURE Study): a prospective epidemiological survey. *Lancet* 2011 doi: 10.1016/S0140-6736(11)61215-4[published Online First: Epub Date]].
  35. Tleyjeh IM, Kashour T, Hakim FA, et al. Statins for the prevention and treatment of infections: a systematic review and meta-analysis. *Arch Intern Med* 2009;**169**(18):1658-67 doi: 10.1001/archinternmed.2009.286[published Online First: Epub Date]].

**FIGURE 1 Sex specific lipid profiles according to heart disease aetiology**Figure legend:

Lipid values are shown as mean  $\pm$  standard error. P values indicate between-sex comparisons per aetiology group (T-test), \*\* =  $P < 0.01$ ; \* =  $P < 0.05$ . NCD = non-communicable heart disease; CD = communicable heart disease; TC= total cholesterol; HDL= high-density lipoprotein cholesterol; LDL= low-density lipoprotein. Y-axis dotted lines show thresholds for high TC and LDL or low HDL (sex specific values).

**FIGURE 2 Prevalence of low high-density lipoprotein cholesterol according to heart disease aetiology**Figure legend:

NCD = non-communicable heart disease; CD = communicable heart disease.

High total cholesterol (TC)  $> 4.5$  mmol/L; Low high-density lipoprotein cholesterol (HDLC) ( $< 1.0$  mmol/L in males,  $< 1.2$  mmol/L in females). High low density lipoprotein cholesterol (LDLC)  $> 2.5$  mmol/L; High triglycerides (TGs)  $> 1.7$  mmol/L

**FIGURE 3 Risk of low high-density lipoprotein cholesterol according to C-reactive protein risk group, relative to low-risk C-reactive protein group (n=367)**Figure legend:

Age-adjusted analysis. CRP = C-reactive protein. \*\* =  $P < 0.01$ ; \* =  $P < 0.05$  relative to low CRP group. For confidence intervals, please refer to Results section.

1  
2  
3  
4  
5  
6  
7  
8  
9  
10  
11  
12  
13  
14  
15  
16  
17  
18  
19  
20  
21  
22  
23  
24  
25  
26  
27  
28  
29  
30  
31  
32  
33  
34  
35  
36  
37  
38  
39  
40  
41  
42  
43  
44  
45  
46  
47  
48  
49  
50  
51  
52  
53  
54  
55  
56  
57  
58  
59  
60

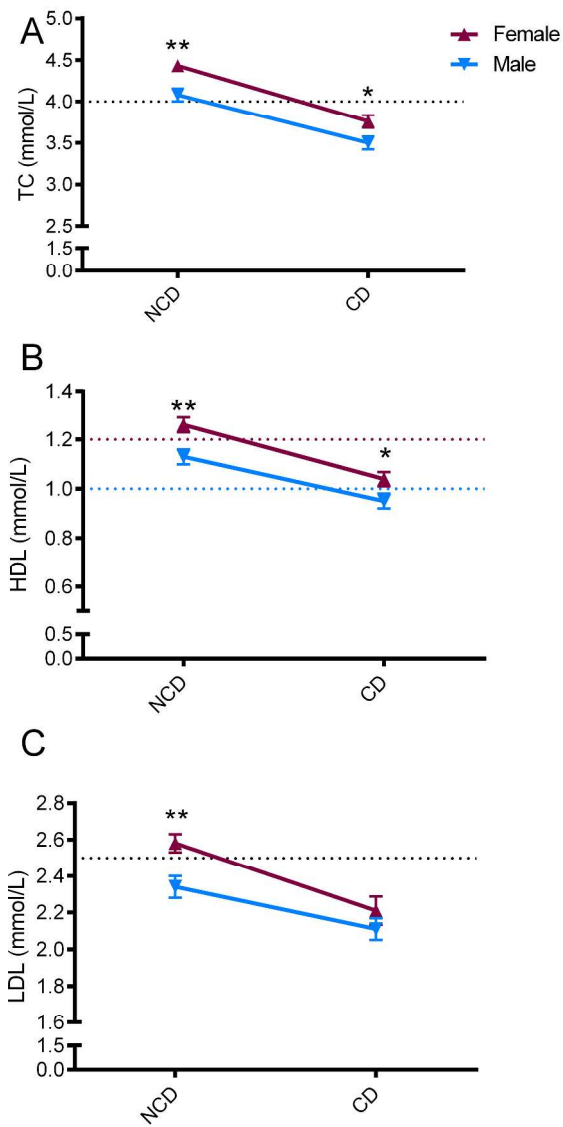

234x447mm (300 x 300 DPI)

1  
2  
3  
4  
5  
6  
7  
8  
9  
10  
11  
12  
13  
14  
15  
16  
17  
18  
19  
20  
21  
22  
23  
24  
25  
26  
27  
28  
29  
30  
31  
32  
33  
34  
35  
36  
37  
38  
39  
40  
41  
42  
43  
44  
45  
46  
47  
48  
49  
50  
51  
52  
53  
54  
55  
56  
57  
58  
59  
60



80x52mm (300 x 300 DPI)

Review only

1  
2  
3  
4  
5  
6  
7  
8  
9  
10  
11  
12  
13  
14  
15  
16  
17  
18  
19  
20  
21  
22  
23  
24  
25  
26  
27  
28  
29  
30  
31  
32  
33  
34  
35  
36  
37  
38  
39  
40  
41  
42  
43  
44  
45  
46  
47  
48  
49  
50  
51  
52  
53  
54  
55  
56  
57  
58  
59  
60

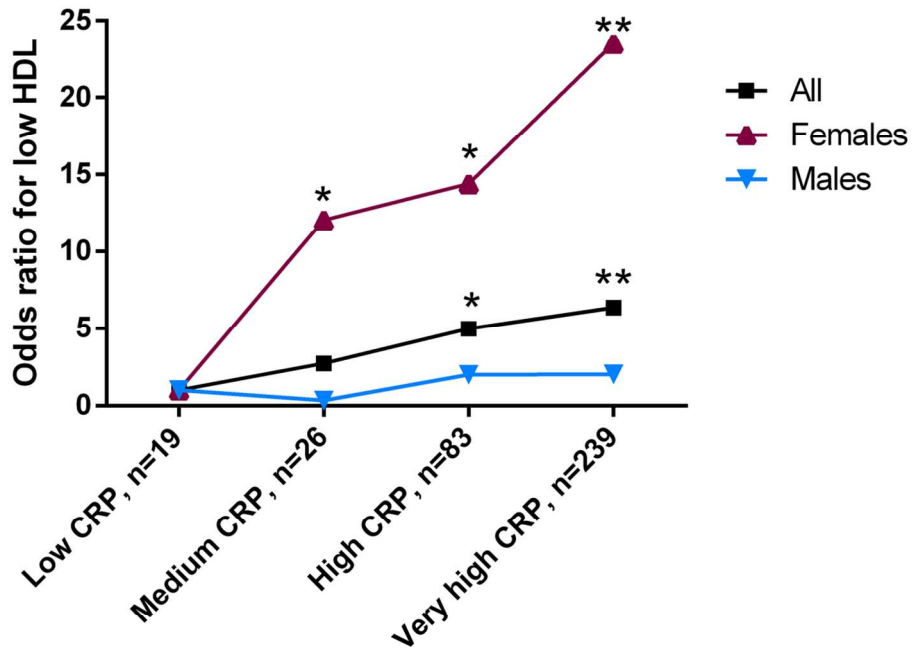

117x90mm (300 x 300 DPI)

Review only

STROBE Statement—Checklist of items that should be included in reports of *cross-sectional studies*

Completed for the article: *Low levels of high-density lipoprotein cholesterol is the most prevalent metabolic abnormality in urban Africans with newly diagnosed heart disease: The ‘Heart of Soweto’ hospital registry study*

Date: 12 February 2014

|                              | Item No | Recommendation                                                                                                                                                                                    | Complete                 |
|------------------------------|---------|---------------------------------------------------------------------------------------------------------------------------------------------------------------------------------------------------|--------------------------|
| <b>Title and abstract</b>    | 1       | (a) Indicate the study’s design with a commonly used term in the title or the abstract                                                                                                            | <input type="checkbox"/> |
|                              |         | (b) Provide in the abstract an informative and balanced summary of what was done and what was found                                                                                               | <input type="checkbox"/> |
| <b>Introduction</b>          |         |                                                                                                                                                                                                   |                          |
| Background/rationale         | 2       | Explain the scientific background and rationale for the investigation being reported                                                                                                              | <input type="checkbox"/> |
| Objectives                   | 3       | State specific objectives, including any prespecified hypotheses                                                                                                                                  | <input type="checkbox"/> |
| <b>Methods</b>               |         |                                                                                                                                                                                                   |                          |
| Study design                 | 4       | Present key elements of study design early in the paper                                                                                                                                           | <input type="checkbox"/> |
| Setting                      | 5       | Describe the setting, locations, and relevant dates, including periods of recruitment, exposure, follow-up, and data collection                                                                   | <input type="checkbox"/> |
| Participants                 | 6       | (a) Give the eligibility criteria, and the sources and methods of selection of participants                                                                                                       | <input type="checkbox"/> |
| Variables                    | 7       | Clearly define all outcomes, exposures, predictors, potential confounders, and effect modifiers. Give diagnostic criteria, if applicable                                                          | <input type="checkbox"/> |
| Data sources/<br>measurement | 8*      | For each variable of interest, give sources of data and details of methods of assessment (measurement). Describe comparability of assessment methods if there is more than one group              | <input type="checkbox"/> |
| Bias                         | 9       | Describe any efforts to address potential sources of bias                                                                                                                                         | <input type="checkbox"/> |
| Study size                   | 10      | Explain how the study size was arrived at                                                                                                                                                         | <input type="checkbox"/> |
| Quantitative variables       | 11      | Explain how quantitative variables were handled in the analyses. If applicable, describe which groupings were chosen and why                                                                      | <input type="checkbox"/> |
| Statistical methods          | 12      | (a) Describe all statistical methods, including those used to control for confounding                                                                                                             | <input type="checkbox"/> |
|                              |         | (b) Describe any methods used to examine subgroups and interactions                                                                                                                               | <input type="checkbox"/> |
|                              |         | (c) Explain how missing data were addressed                                                                                                                                                       | <input type="checkbox"/> |
|                              |         | (d) If applicable, describe analytical methods taking account of sampling strategy                                                                                                                | <input type="checkbox"/> |
|                              |         | (e) Describe any sensitivity analyses                                                                                                                                                             | N/A                      |
| <b>Results</b>               |         |                                                                                                                                                                                                   |                          |
| Participants                 | 13*     | (a) Report numbers of individuals at each stage of study—eg numbers potentially eligible, examined for eligibility, confirmed eligible, included in the study, completing follow-up, and analysed | <input type="checkbox"/> |
|                              |         | (b) Give reasons for non-participation at each stage                                                                                                                                              | <input type="checkbox"/> |
|                              |         | (c) Consider use of a flow diagram                                                                                                                                                                | N/A                      |
| Descriptive data             | 14*     | (a) Give characteristics of study participants (eg demographic, clinical, social) and information on exposures and potential confounders                                                          | <input type="checkbox"/> |

|                          |     |                                                                                                                                                                                                              |     |
|--------------------------|-----|--------------------------------------------------------------------------------------------------------------------------------------------------------------------------------------------------------------|-----|
|                          |     | (b) Indicate number of participants with missing data for each variable of interest                                                                                                                          | □   |
| Outcome data             | 15* | Report numbers of outcome events or summary measures                                                                                                                                                         | □   |
| Main results             | 16  | (a) Give unadjusted estimates and, if applicable, confounder-adjusted estimates and their precision (eg, 95% confidence interval). Make clear which confounders were adjusted for and why they were included | □   |
|                          |     | (b) Report category boundaries when continuous variables were categorized                                                                                                                                    | N/A |
|                          |     | (c) If relevant, consider translating estimates of relative risk into absolute risk for a meaningful time period                                                                                             | N/A |
| Other analyses           | 17  | Report other analyses done—eg analyses of subgroups and interactions, and sensitivity analyses                                                                                                               | □   |
| <b>Discussion</b>        |     |                                                                                                                                                                                                              |     |
| Key results              | 18  | Summarise key results with reference to study objectives                                                                                                                                                     | □   |
| Limitations              | 19  | Discuss limitations of the study, taking into account sources of potential bias or imprecision. Discuss both direction and magnitude of any potential bias                                                   | □   |
| Interpretation           | 20  | Give a cautious overall interpretation of results considering objectives, limitations, multiplicity of analyses, results from similar studies, and other relevant evidence                                   | □   |
| Generalisability         | 21  | Discuss the generalisability (external validity) of the study results                                                                                                                                        | □   |
| <b>Other information</b> |     |                                                                                                                                                                                                              |     |
| Funding                  | 22  | Give the source of funding and the role of the funders for the present study and, if applicable, for the original study on which the present article is based                                                | □   |

\*Give information separately for exposed and unexposed groups.



# BMJ Open

## Lower Levels of High-density Lipoprotein Cholesterol in Urban Africans Presenting with Communicable Versus Non-communicable Forms of Heart Disease: The 'Heart of Soweto' hospital registry study



|                                 |                                                                                                                                                                                                                                                                                                                                                                                                                                                                                                                                                                                                                                                                                                                                                                                                                                                                                                          |
|---------------------------------|----------------------------------------------------------------------------------------------------------------------------------------------------------------------------------------------------------------------------------------------------------------------------------------------------------------------------------------------------------------------------------------------------------------------------------------------------------------------------------------------------------------------------------------------------------------------------------------------------------------------------------------------------------------------------------------------------------------------------------------------------------------------------------------------------------------------------------------------------------------------------------------------------------|
| Journal:                        | <i>BMJ Open</i>                                                                                                                                                                                                                                                                                                                                                                                                                                                                                                                                                                                                                                                                                                                                                                                                                                                                                          |
| Manuscript ID:                  | bmjopen-2014-005069.R2                                                                                                                                                                                                                                                                                                                                                                                                                                                                                                                                                                                                                                                                                                                                                                                                                                                                                   |
| Article Type:                   | Research                                                                                                                                                                                                                                                                                                                                                                                                                                                                                                                                                                                                                                                                                                                                                                                                                                                                                                 |
| Date Submitted by the Author:   | 22-Jun-2014                                                                                                                                                                                                                                                                                                                                                                                                                                                                                                                                                                                                                                                                                                                                                                                                                                                                                              |
| Complete List of Authors:       | Lyons, Jasmine; Baker IDI Heart and Diabetes Institute, Preventative Health<br>Sliwa, Karen; University of the Witwatersrand, Soweto Cardiovascular Research Unit<br>Carrington, Melinda; Baker IDI Heart and Diabetes Institute, Preventative Health; University of the Witwatersrand, Soweto Cardiovascular Research Unit<br>Raal, Frederick; University of the Witwatersrand, Carbohydrate and Lipid Metabolism Research Unit<br>Pretorius, Sandra; University of the Witwatersrand, Soweto Cardiovascular Research Unit<br>Thienemann, Freidrich; University of Cape Town, Institute of Infectious Diseases and Molecular Medicine; University of Cape Town, Hatter Institute for Cardiovascular Research in Africa, Cape Heart Group and IIDMM<br>STEWART, SIMON; Baker IDI Heart and Diabetes Institute, Preventative Health; University of the Witwatersrand, Soweto Cardiovascular Research Unit |
| <b>Primary Subject Heading</b>: | Cardiovascular medicine                                                                                                                                                                                                                                                                                                                                                                                                                                                                                                                                                                                                                                                                                                                                                                                                                                                                                  |
| Secondary Subject Heading:      | Public health, Epidemiology                                                                                                                                                                                                                                                                                                                                                                                                                                                                                                                                                                                                                                                                                                                                                                                                                                                                              |
| Keywords:                       | Cardiac Epidemiology < CARDIOLOGY, Epidemiology < INFECTIOUS DISEASES, PREVENTIVE MEDICINE                                                                                                                                                                                                                                                                                                                                                                                                                                                                                                                                                                                                                                                                                                                                                                                                               |
|                                 |                                                                                                                                                                                                                                                                                                                                                                                                                                                                                                                                                                                                                                                                                                                                                                                                                                                                                                          |

SCHOLARONE™  
Manuscripts

1  
2  
3 **Lower Levels of High-density Lipoprotein Cholesterol in Urban Africans**  
4  
5 **Presenting with Communicable Versus Non-communicable Forms of Heart**  
6  
7 **Disease: The ‘Heart of Soweto’ hospital registry study**  
8  
9

10  
11  
12 **Short title:** Lyons – HDLC in communicable heart disease  
13  
14

15  
16  
17 **Authors:** Jasmine G. Lyons (1, 2)  
18 Karen Sliwa (3, 4)  
19 Melinda J. Carrington (1, 4, 5)  
20 Frederick Raal (7)  
21 Sandra Pretorius (3)  
22 Friedrich Thienemann (3, 6, 8)  
23 Simon Stewart (1, 3, 4, 5)  
24  
25  
26  
27  
28  
29

30 **Affiliations:**

- 31  
32 (1) Baker IDI Heart and Diabetes Institute, Melbourne, Australia  
33 (2) Division of Health Sciences, University of South Australia, Adelaide, Australia  
34 (3) Hatter Institute for Cardiovascular Research in Africa, Cape Heart Group and IIDMM,  
35 University of Cape Town, Cape Town, South Africa  
36  
37 (4) Soweto Cardiovascular Research Unit, University of the Witwatersrand, Johannesburg,  
38 South Africa  
39  
40 (5) Department of Epidemiology and Preventative Medicine, Monash University, Melbourne,  
41 Australia  
42  
43 (6) Institute of Infectious Diseases and Molecular Medicine, University of Cape Town, South  
44 Africa  
45  
46 (7) Carbohydrate and Lipid Metabolism Research unit, University of the Witwatersrand,  
47 Johannesburg, South Africa  
48  
49 (8) Infectious Diseases Referral Clinic, GF Jooste Hospital, Manenberg, South Africa  
50  
51  
52

53  
54  
55 **Address for Correspondence:** Professor Simon Stewart, Preventative Health, Baker IDI Heart  
56 and Diabetes Institute, PO Box 6492, St Kilda Rd Central, Melbourne, Victoria, 8008, Australia  
57  
58 E-mail: [simon.stewart@bakeridi.edu.au](mailto:simon.stewart@bakeridi.edu.au)  
59  
60

Telephone: +61 3 8532 1640

Fax: +61 3 8532 1100

1  
2  
3  
4 **Key Words:** High-density lipoprotein, lipids, infection, epidemiologic transition, Africa.  
5  
6  
7

8 **Word count:** 3540 not including 2 tables, 3 figures and 36 references.  
9  
10  
11  
12  
13  
14  
15  
16  
17  
18  
19  
20  
21  
22  
23  
24  
25  
26  
27  
28  
29  
30  
31  
32  
33  
34  
35  
36  
37  
38  
39  
40  
41  
42  
43  
44  
45  
46  
47  
48  
49  
50  
51  
52  
53  
54  
55  
56  
57  
58  
59  
60

For peer review only

**ABSTRACT**

**Objectives:** To investigate if urban Africans displayed lower levels of atheroprotective high-density lipoprotein cholesterol (HDLC) when presenting with communicable versus non-communicable forms of heart disease (HD) as both acute infection and chronic inflammation reduce HDLC levels.

**Design:** Hospital registry of 5328 de novo cases of HD over a 3-year period.

**Setting:** Cardiology Unit, Baragwanath Hospital in Soweto, South Africa.

**Participants:** A total of 1199 patients of African descent (59% women; 57.0±13.4 years) had fasting blood lipid levels (Total cholesterol [TC], triglyceride, HDLC, and low-density lipoprotein [LDLC] cholesterol) documented on admission. Serum inflammatory marker C-reactive protein (CRP) was measured in a sub-set of 367 patients (31% of cases).

**Main outcome measures:** Lipid profiles were compared according to pre-specified classification of non-communicable (e.g. hypertensive HD) versus communicable (e.g. rheumatic HD) HD. Low HDLC was defined as <1.0 mmol/L for men and <1.2mmol/L for women, according to applicable South African Clinical Guidelines.

**Results:** Overall 694 (58%) of those presenting with HD had low HDLC levels; 344 of 678 (51%) and 350 of 521 (67%) for non-communicable and communicable, respectively ( $p<0.001$ ). Comparatively, overall prevalence of high TC was 32% and high LDLC was 37%. On an adjusted basis, those with non-communicable HD were more likely to record a low HDLC relative to non-communicable presentations (OR 1.91, 95%CI 1.42, 2.57;  $p<0.001$ ). There was a strong relationship between low HDLC and higher levels of CRP, but only in women.

**Conclusions:** Despite largely favourable lipid profiles, there are clear differences according to aetiology of underlying HD in urban Africans, with younger patients with communicable HD having particularly low levels of HDLC. Appropriate prospective evidence is needed to determine if persistent low levels of HDLC expose patients to increased, long-term risk of atherosclerotic forms of HD. The women-only inverse association between HDL-C and CRP warrants further investigation.

## ARTICLE SUMMARY

### Article focus:

- In sub-Saharan Africa, the incidence of non-communicable cardiovascular disease is increasing while, simultaneously, communicable forms of heart disease continue to cause considerable levels of morbidity and mortality.
- In this study, we have sought to explore one heart disease risk factor, dyslipidaemia, in a well-defined clinical registry in Soweto, South Africa.
- Lipid profiles from 1199 de novo presentations of heart disease were compared according to pre-specified classification of non-communicable heart disease (e.g. hypertensive heart disease) versus communicable forms of heart disease (e.g. pericarditis or chronic rheumatic heart disease). We hypothesised that those diagnosed with communicable heart disease would display an adverse lipid profile, with low levels of atheroprotective high-density lipoprotein cholesterol (HDLC). We also investigated the potential interaction of the inflammatory marker C-reactive protein (CRP) and low HDLC in a subset of these patients.

### Key messages:

- We describe distinct patterns of dyslipidaemia according to underlying heart disease aetiology: significantly decreased levels of HDLC, total cholesterol and low-density lipoprotein cholesterol in those with communicable heart disease (representing 43% of cohort) compared to those with non-communicable heart disease (57% of cohort).
- In adjusted analyses, low HDLC was more pronounced in those with communicable heart disease. In those with high CRP levels, we present novel data showing a sex-disparate relationship between CRP and low HDLC, with a strong relationship between high CRP and low HDLC in women only.
- The high prevalence of low HDLC in a relatively young population of urban Africans may, if persistent in the longer-term, confer greater risk of atherosclerotic heart disease

### Strengths and limitations of the study:

- We report a high prevalence of low HDLC in *de novo* presentations of both communicable heart disease and non-communicable heart disease, with a greater prevalence in those with communicable heart disease.
- The study cohort is clinically very well defined; however the lipid data were obtained according to clinical presentation, which may impose systematic bias to the results.
- This hospital registry study has provided preliminary data that would support prospective investigation of longer-term dyslipidaemia patterns and their impact on heart disease incidence, both in South Africa and in other low-and-middle-income countries where the epidemiologic transition is currently underway.

## INTRODUCTION

1  
2  
3  
4  
5  
6  
7  
8  
9  
10  
11  
12  
13  
14  
15  
16  
17  
18  
19  
20  
21  
22  
23  
24  
25  
26  
27  
28  
29  
30  
31  
32  
33  
34  
35  
36  
37  
38  
39  
40  
41  
42  
43  
44  
45  
46  
47  
48  
49  
50  
51  
52  
53  
54  
55  
56  
57  
58  
59  
60

Heart diseases with infectious aetiology have long been the principal forms of cardiovascular disease (CVD) in Sub-Saharan Africa. However, epidemiological transition has seen increased prevalence of non-communicable forms of heart disease in these populations[1]. This phenomenon is largely driven by complex, population-wide changes in demographic, social and economic status, with associated changes in lifestyle habits[2-4]. Indicative of the tension between 'old' and 'new' forms of heart disease, the incidence of communicable heart disease (HD) is sustained by the devastating epidemics of human immunodeficiency virus/acquired immune deficiency syndrome (HIV/AIDS), tuberculosis (TB), rheumatic heart disease (RHD) and parasitic infections with cardiac involvement[5-7], while in parallel, the prevalence of risk factors for non-communicable HD increases[8].

Low serum levels of high-density lipoprotein cholesterol (HDLC) are consistently and independently associated with increased risk of atherosclerotic forms of CVD[9 10]. However, it remains uncertain whether low HDLC is causal or just a cardiovascular risk marker[11]. If we are to extrapolate from studies in Western and Asian populations[12-14], isolated low HDLC is associated with increased risk for CVD in the long-term. There are several causes of low HDLC levels, including overweight, obesity, tobacco smoking, and insulin resistance/type 2 diabetes mellitus, indicative of the important role lifestyle factors have in mediating HDLC levels[9]. Additionally, low HDLC is a striking consequence of abnormal lipid metabolism in infection and inflammation[15]. Although it has been shown that those of African descent largely show a favourable lipid profile characterised by high HDLC levels [16], it is unlikely that they can remain athero-protective during an infected state[15]. Indeed, in this setting, it is probable that increasing prevalence of modifiable/ lifestyle risk factors contribute to a more advanced presentation in those with communicable HD[8]. We have previously reported that in the geographically compact townships that comprise Soweto in South Africa, 'old' and 'new' forms of HD are simultaneously present[8]. While this tension exists, we have a unique opportunity to explore lipid profiles in patients presenting with non-communicable versus communicable forms of HD.

## STUDY HYPOTHESES

Having shown important ethnic differences in the lipid profiles of patients of African descent presenting with HD in the urban African enclave of Soweto[16], we hypothesised that independent of age and sex, urban Africans presenting with communicable HD will demonstrate patterns of dyslipidaemia associated with infection/inflammation, particularly sub-optimal levels of HDLC, versus non-communicable HD.

## METHODS

### Study Setting & Design

As described in detail previously[8 17] the 3,500 bed Chris Hani Baragwanath Hospital (case load of > 125,000 in-patients per annum) services the tertiary care needs of Soweto (population of 1.1 million) and surrounding communities. All suspected cardiac presentations are referred to the hospital's Cardiology Unit for advanced diagnostic testing and gold-standard treatments. A prospective clinical registry of all *de novo* presentations of the same was established in 2006 as part of the Heart of Soweto Study and represents sub-Saharan Africa's largest and most detailed study of advanced forms of HD to date[17].

### Participants

The 'Heart of Soweto' cohort of *de novo* case presentations comprised 5328 patients. Of these, 2185 patients (40%) had a documented fasting lipid profile (serum total cholesterol (TC) level, triglyceride, HDLC and calculated low-density lipoprotein cholesterol (LDLC)[18] undertaken at Baragwanath Hospital on-site pathology). None of the patients were on lipid lowering agents at the time of presentation, as this medication can only be prescribed at the tertiary institution.

However some of the patients had been placed on anti-hypertensive medication prior to their first assessment at the Cardiac Clinic at Baragwanath Hospital. Moreover, only a small number of patients (39 cases) had been prescribed anti-retroviral therapy (ART) on presentation. The study was approved by the University of the Witwatersrand Ethical Committee and conforms to the principles outlined in the Declaration of Helsinki. All patients provided informed consent.



## Study Data

1  
2  
3 A complete list of study data captured by the registry, comprising basic socio-demographic  
4 (including self-reported ethnicity, years of education and determining if the patient was born in  
5 Soweto) and advanced clinical profiling, has been described previously[8 17] The registry  
6  
7 captured all advanced clinical investigative procedures (e.g. coronary angiography, which was  
8  
9 undertaken in all people diagnosed with coronary artery disease (CAD)). Echocardiography  
10  
11 (performed on all patients) criteria used in the study has been described in detail previously[8  
12  
13  
14  
15  
16  
17].

## Case Classifications

18  
19  
20 Adjudication and classification of communicable and non-communicable presentations of HD in  
21  
22 this cohort have been previously described[8]. After exclusion of those with uncomplicated  
23  
24 hypertension (i.e. without evidence of cardiac dysfunction, n=380) or other non-modifiable  
25  
26 aetiologies (e.g. congenital disorders), 1199 patients of African descent (22% of the total 'Heart  
27  
28 of Soweto' cohort) were included in this analysis. Contributory diagnoses for non-communicable  
29  
30 HD were predominantly hypertensive heart failure (HT-HF) and coronary artery disease (without  
31  
32 HIV). Communicable heart disease was predominantly classified as HIV-dilated cardiomyopathy  
33  
34 (HIV-DCMO), HIV-pulmonary hypertension, TB pericardial disease, and pericarditis due to other  
35  
36 infection.  
37  
38

## Risk factor definition

39  
40  
41 Optimum lipid levels and treatment goals with established CVD were defined according to  
42  
43 international guidelines[9] adopted by the Lipid and Atherosclerosis Society of South Africa and  
44  
45 the South African Heart Association - high TC: >4.5 mmol/L, high TGs: >1.7 mmol/L, high LDLC:  
46  
47 >2.5 mmol/L and low HDLC: <1.0 for men and <1.2 mmol/L for women[19]. Other risk factors  
48  
49 were measured on a clinical basis, as previously described[17]. Anthropometric measurements  
50  
51 were available for calculation of body mass index (BMI, kg/m<sup>2</sup>) in 854 (71%) cases, the low  
52  
53 reporting rate restricted to ambulatory patients. Obesity was defined as BMI ≥ 30 kg/m<sup>2</sup>. Serum  
54  
55 C-reactive protein (CRP) was measured in a sub-set of 367 patients (31% of all cases) if  
56  
57 clinically indicated (e.g. suspected infection). Patients were stratified into clinically relevant CRP  
58  
59  
60

1 categories[20], as defined by Dhingra and colleagues[21]. Patients with a CRP of 1 mg/L (n=19)  
2 were used as reference group and compared to medium (1.1-3.0 mg/L, n=26), high (3.1-10.0  
3 mg/L, n=83) and very high (>10.0 mg/L, n=239) CRP categories.  
4  
5

### 6 **Statistical analyses**

7  
8 Normally distributed continuous data are presented as the mean  $\pm$  standard deviation and non-  
9 Gaussian distributed variables as the median (inter-quartile range). Categorical data are  
10 presented as sample number and percentages. For group comparisons, we initially used Chi  
11 Square ( $\chi^2$ ) analysis with calculation of odds ratios (OR) with 95% confidence intervals (CI)  
12 presented where appropriate for discrete variables, and independent T-tests for normally  
13 distributed continuous variables and Mann-Whitney U test for nonparametric continuous  
14 variables. Multiple logistic regression analyses (entry model) were used to derive age and sex  
15 adjusted ORs (and BMI in some analyses, as described) for the risk of presenting with clinically  
16 relevant variables (primarily dyslipidaemia profiles), according to CD HD relative to NCD  
17 diagnosis. Significance was accepted at the two-sided level of  $p < 0.05$ .  
18  
19  
20  
21  
22  
23  
24  
25  
26  
27  
28  
29  
30  
31  
32  
33  
34  
35  
36  
37  
38  
39  
40  
41  
42  
43  
44  
45  
46  
47  
48  
49  
50  
51  
52  
53  
54  
55  
56  
57  
58  
59  
60

## RESULTS

## Clinical and Demographic Profile

**Table 1** shows the socio-demographic and clinical profile of this cohort according to cardiac aetiology. Those presenting with non-communicable HD (n=678, 56.5% of cohort) were older and had higher BMI and mean SBP and DBP than those with communicable HD (n=521, 43.5%; all comparisons p<0.001). Overall, 76 (6%) were confirmed HIV-positive: 15 (2%) and 61 (12%) patients were confirmed HIV-positive in non-communicable and communicable HD groups respectively (P<0.001). Apart from higher BMIs in women (30.6 ± 6.9 vs. 26.7 ± 5.5 kg/m<sup>2</sup> in men, p<0.001) there were no significant differences between sexes in respect to other clinical parameters. To this, the prevalence of obesity in women was 50% as compared to men (26%), P<0.001.

**TABLE 1 Clinical and demographic profile according to heart disease aetiology**

|                                       | <b>ALL Cases</b><br>n=1199 | <b>Non-communicable</b><br>n=678 (57%) | <b>Communicable</b><br>n=521 (43%) | <b>P value</b> |
|---------------------------------------|----------------------------|----------------------------------------|------------------------------------|----------------|
| <b>Demographic Profile</b>            |                            |                                        |                                    |                |
| <b>Mean age (years)</b>               | 58.3 ± 14.0                | 60.1 ± 13.1                            | 55.9 ± 14.9                        | <0.001         |
| <b>Women</b>                          | 701 (59%)                  | 403 (59%)                              | 298 (57%)                          | 0.44           |
| <b>&lt;6 years formal education</b>   | 582 (49%)                  | 335 (49%)                              | 247 (47%)                          | 0.52           |
| <b>Soweto origin</b>                  | 562 (47%)                  | 327 (48%)                              | 235 (45%)                          | 0.29           |
| <b>Clinical Presentation</b>          |                            |                                        |                                    |                |
| <b>Total cholesterol (mmol/L)</b>     | 4.0 ± 1.4                  | 4.3 ± 1.3                              | 3.7 ± 1.2                          | <0.001         |
| <b>HDLC (mmol/L)</b>                  | 1.1 ± 0.5                  | 1.2 ± 0.5                              | 1.0 ± 0.5                          | <0.001         |
| <b>Median triglycerides (mmol/L)*</b> | 1.1 (0.8, 1.5)             | 1.1 (0.8, 1.6)                         | 1.0 (0.7, 1.3)                     | <0.001         |
| <b>LDLC (mmol/L)</b>                  | 2.4 ± 1.0                  | 2.5 ± 1.0                              | 2.2 ± 0.9                          | <0.001         |
| <b>TC:HDLC ratio</b>                  | 4.3 ± 3.0                  | 4.2 ± 3.1                              | 4.4 ± 2.7                          | 0.27           |
| <b>LDL:HDLC ratio</b>                 | 2.5 ± 1.1                  | 2.5 ± 1.0                              | 2.7 ± 1.1                          | 0.36           |
| <b>TG:HDLC ratio*</b>                 | 1.1 (0.7, 1.7)             | 1.0 (0.7, 1.7)                         | 1.1 (0.7, 1.8)                     | 0.12           |
| <b>Median serum CRP (mg/L)*</b>       | 19 (7.0, 45.0)             | 16.8 (6.6, 41.5)                       | 20.5 (7.8, 55.9)                   | 0.25           |

|                                                              |            |            |            |        |
|--------------------------------------------------------------|------------|------------|------------|--------|
| <b>Systolic BP (mmHg)</b>                                    | 135 ± 29   | 143 ± 29   | 126 ± 26   | <0.001 |
| <b>Diastolic BP (mmHg)</b>                                   | 78 ± 16    | 80 ± 16    | 74 ± 16    | <0.001 |
| <b>BMI (kg/m<sup>2</sup>)</b>                                | 29.0 ± 6.7 | 30.3 ± 6.7 | 27.2 ± 6.2 | <0.001 |
| <b>Prevalence of dyslipidaemia (n, %)</b>                    |            |            |            |        |
| <b>High total cholesterol (&gt; 5mmol/L)</b>                 | 378 (32%)  | 266 (39%)  | 112 (22%)  | <0.001 |
| <b>Low HDLC (&lt; 1 in men and &lt; 1.2 mmol/L in women)</b> | 694 (58%)  | 344 (51%)  | 350 (67%)  | <0.001 |
| <b>High LDLC (&gt; 2.5 mmol/L)</b>                           | 446 (37%)  | 291 (43%)  | 155 (30%)  | <0.001 |
| <b>High triglycerides (&gt; 1.7 mmol/l)</b>                  | 215 (18%)  | 143 (21%)  | 72 (14%)   | 0.001  |
| <b>Prevalence of other risk factors (n, %)</b>               |            |            |            |        |
| <b>Obese (BMI &gt;30 kg/m<sup>2</sup>)</b>                   | 344 (40%)  | 237 (48%)  | 107 (30%)  | <0.001 |
| <b>Type 2 diabetes</b>                                       | 98 (8%)    | 71 (11%)   | 27 (5%)    | <0.001 |
| <b>Past or current smoker</b>                                | 566 (47%)  | 321(47%)   | 245 (47%)  | 0.95   |
| <b>Family history of CVD</b>                                 | 466 (39%)  | 286 (42%)  | 180 (35%)  | 0.01   |
| <b>Confirmed HIV-positive cases</b>                          | 76 (6%)    | 15 (2%)    | 61 (12%)   | <0.001 |

Table legend:

LDLC = low-density lipoprotein cholesterol; HDLC = high-density lipoprotein cholesterol; TG = triglycerides; BMI = body mass index (available in 854 cases); CRP = C-reactive protein (available in 367 cases); CVD = cardiovascular disease; HIV = human immunodeficiency virus.

\*Median (interquartile range) values presented, differences tested by Mann-Whitney U test

**Aetiology of heart disease (primary diagnosis)**

Overall, the most prevalent primary diagnoses were HT-HF (n=461, 38%), dilated cardiomyopathy (DCMO, n= 178, 15%) and CAD (n=157, 12%). In those classified as non-communicable HD, HT-HF was the main primary diagnosis (n=461, 68%), along with CAD (without concurrent HIV-infection; n=157, 23%). Dilated cardiomyopathy (n=178, 34%), right heart failure (n=92, 18%) and right heart disease (n=63, 12%) and other forms of primary valve

1 disease (n=71, 14%), were the most common diagnoses in those classified with communicable  
2 forms of HD.  
3

#### 4 **Lipid Profiles**

5 Those with communicable HD had significantly lower TC, LDLC, and HDLC compared with  
6 patients with non-communicable HD (**Table 1** and **Figure 1**,  $p < 0.001$  for all comparisons).  
7

8 Overall, women had significantly higher TC ( $4.2 \pm 1.3$  mmol/L vs.  $3.8 \pm 1.2$  mmol/L,  $p < 0.001$ );  
9 LDLC ( $2.4 \pm 1.0$  mmol/L vs.  $2.2 \pm 1.0$  mmol/L,  $p < 0.01$ ), and HDLC compared to men ( $1.2 \pm 0.5$   
10 mmol/L vs.  $1.0 \pm 0.5$  mmol/L,  $p < 0.001$ ). This gender difference did not extend to triglycerides  
11 ( $1.1(0.4-1.8)$  mmol/L vs.  $1.1(0.4-1.8)$ ,  $p = 0.7$ ) nor TC:HDLC ratio ( $4.2 \pm 3.1$  mmol/L vs.  $4.3 \pm 2.7$   
12 mmol/L,  $p = 0.6$ ). Lipid ratios were calculated and compared (**Table 1**). There was no significant  
13 differences between aetiology groups for either TC:HDL or TG:HDL groups. However LDL:HDL  
14 ratios were significantly higher in the communicable group.  
15

16 Levels of TC (Figure 1A), HDLC (Figure 1B) and LDLC (Figure 1C) were significantly higher in  
17 women with non-communicable HD (**Figure 1**). However in those diagnosed with communicable  
18 HD, small, but significant, differences were observed only for TC and HDLC, not LDL (**Figure**  
19 **1**). Overall, prevalence of dyslipidaemia varied from 18% of patients with high triglycerides to  
20 58% with low HDLC (**Table 1** and **Figure 2**). Consistent with the decrease observed with the  
21 actual levels, prevalence of high TC and high LDLC was increased in those with non-  
22 communicable HD aetiologies while low HDLC levels prevalence was higher in those with  
23 communicable HD (**Table 1** and **Figure 2**). There were no patients with TG levels  $> 4.5$  mmol/L  
24 (range 0.1-3.8 mmol/L) which makes use of the Friedewald equation suitable for this cohort[18].  
25 **Table 2** shows independent associations between relevant socio-economic, demographic and  
26 clinical variables and communicable HD aetiology, relative to those presenting with non-  
27 communicable HD. The effect of HD aetiology on low HDLC dyslipidaemia was strong and  
28 consistent: adjusting for age, sex and BMI of patients, those with forms of communicable HD  
29 were significantly more likely to record a low HDLC relative to those presenting with non-  
30 communicable HD (**Table 2**,  $p < 0.001$ ) and less likely to record high TC and LDLC (**Table 2**).  
31  
32  
33  
34  
35  
36  
37  
38  
39  
40  
41  
42  
43  
44  
45  
46  
47  
48  
49  
50  
51  
52  
53  
54  
55  
56  
57  
58  
59  
60

Patients with communicable HD were less likely to record high triglyceride levels (OR 0.65, 95%CI 0.51, 0.84,  $p < 0.05$ ) compared to those with non-communicable HD.

**TABLE 2 Independent correlates of communicable heart disease, relative to non-communicable heart disease**

|                                          | Communicable disease |               |
|------------------------------------------|----------------------|---------------|
|                                          | Odds Ratio           | 95% CI        |
| <b>Women</b>                             | 0.91                 | 0.72, 1.15    |
| <b>Age</b>                               | 0.98                 | 0.97, 0.99**  |
| <b>Obesity</b>                           | 0.50                 | 0.37, 0.68*** |
| <b>&lt; 6 years formal education</b>     | 1.11                 | 0.88, 1.42    |
| <b>Soweto origin</b>                     | 0.98                 | 0.77, 1.24    |
| <b>Body mass index adjusted analysis</b> |                      |               |
| <b>High TC</b>                           | 0.52                 | 0.37, 0.71*** |
| <b>High LDLC</b>                         | 0.56                 | 0.41, 0.76*** |
| <b>Low HDLC</b>                          | 1.91                 | 1.42, 2.57*** |
| <b>High TG</b>                           | 0.65                 | 0.51, 0.84*   |

Table legend:

Obesity BMI  $> 30 \text{ kg/m}^2$ ; High total cholesterol (TC)  $> 4.5 \text{ mmol/L}$ ; High low density lipoprotein (LDLC)  $> 2.5 \text{ mmol/L}$ ; Low high density lipoprotein (HDLC) ( $< 1.0 \text{ mmol/L}$  in men,  $< 1.2 \text{ mmol/L}$  in women). OR = odds ratio; CI = confidence intervals. Age and sex-adjusted analysis: \*  $p < 0.05$ ; \*\*  $p < 0.01$ ; \*\*\*  $p < 0.001$ .

**CRP subset analysis**

Overall, there was no significant difference in CRP levels between aetiology groups (**Table 1**). The proportion of confirmed HIV cases in this CRP subset analysis was 7% ( $n=27$ ). Of those, 23 were in the very high-risk category. There was also no association between CRP-derived risk categories and high TC, LDLC or triglycerides (data not shown). However the risk of having low HDLC increased with increasing CRP levels. In age and sex-adjusted analyses, those with

1  
2  
3  
4  
5  
6  
7  
8  
9  
10  
11  
12  
13  
14  
15  
16  
17  
18  
19  
20  
21  
22  
23  
24  
25  
26  
27  
28  
29  
30  
31  
32  
33  
34  
35  
36  
37  
38  
39  
40  
41  
42  
43  
44  
45  
46  
47  
48  
49  
50  
51  
52  
53  
54  
55  
56  
57  
58  
59  
60

medium risk (OR 2.73, 95% CI 0.68, 10.89, P=0.16), high risk (OR 4.98, 95% CI 1.46, 17.00, P=0.01) and very high risk (OR 6.37, 95% CI 1.97, 20.57, p<0.01) CRP levels were significantly more likely to record a low HDLC relative to those in the low risk CRP group. Also, when stratified by sex, a strong, positive association remained in women but was no longer apparent in men (**Figure 3**). In women, the pattern was significant across all CRP risk categories: compared to low risk, those with medium risk (OR 12.1, 95% CI 1.21, 120, p=0.03), high risk (OR 14.4, 95% CI 1.64, 126, p=0.02) and very high risk (OR 23.5, 95% CI 2.81, 197, p=0.004) CRP levels were all more likely to record a low HDLC. Moreover, the association was not weakened by addition of BMI into the model (BMI and CRP measurements available in only 230 cases) in overall and women-only (n=133) models: those with medium risk (OR 20.5, 95% CI 1.72, 246, p=0.02), high risk (OR 10.6, 95% CI 1.14, 98.8, p=0.04) and very high risk (OR 21.0, 95% CI 2.38, 185, p<0.01) CRP levels were all more likely to record a low HDLC.

**DISCUSSION**

1  
2 We report significant decreases in lipid levels (TC, HDLC and LDLC) and age and BMI  
3 according to non-communicable and communicable manifestations of *de novo* HD in urban  
4 Africans, patterns that were observed in both sexes. The high prevalence of low HDLC in more  
5 than half of all cases, but much higher in those with communicable HD, is most striking. Also, it  
6 appears that gender is an effect modifier in the relationship between CRP and low HDLC in this  
7 cohort, but, importantly, the relationship remains even after adjustment for the significant  
8 confounder of adiposity.  
9

10  
11 While traditionally uncommon[22], dyslipidaemia, in particular low HDLC, is becoming  
12 more prevalent in sub-Saharan Africa[23 24]. The low lipid levels present in the majority of  
13 cases with communicable HD reflects the dramatic changes to lipid metabolism observed in  
14 infection and is therefore, anticipated. We acknowledge that atherogenic LDLC is also low in  
15 this setting and that low HDLC may not be indicative of particularly increased disease risk, at  
16 least in the short-term. However we still deem this as highly clinically relevant given that even  
17 isolated low HDLC is associated with a higher risk of atherosclerotic forms of HD, a finding that  
18 has been seen in diverse populations[12-14]. Interestingly triglyceride levels were not  
19 significantly increased in those with communicable forms of HD, despite evidence that it can  
20 increase as part of the infectious/inflammatory metabolic milieu[15]. Additionally, we speculate  
21 that the higher lipid levels in women may be the result of much higher rates of obesity (50%  
22 compared with 26% in men) as the driver of elevated total cholesterol, which has been  
23 suggested by authors of a worldwide systematic analysis on high TC [25].  
24  
25

26  
27 Our interest in this phenomenon predominantly relates to the longer-term effects of low  
28 HDLC, especially when observed together with the amplified vascular risk associated with  
29 chronic infection[15]. In Africa, where acute coronary syndromes are seen in a relatively young  
30 population[26], we predict the very high rates of myriad communicable disease[27 28] will result  
31 in more complex cases, with potentially poorer outcomes in the long-term, given the critical role  
32 of HDLC in both innate and adaptive immunity[15]. While many infectious diseases (bacterial  
33 and viral) have contributed to the underlying pathology of HD reported here[5], dyslipidemia  
34  
35  
36  
37  
38  
39  
40  
41  
42  
43  
44  
45  
46  
47  
48  
49  
50  
51  
52  
53  
54  
55  
56  
57  
58  
59  
60



1 associated with HIV infection has been particularly well studied. HIV-related low HDLC is likely a  
2 consequence of both the viral infection and an adverse effect of some anti-retroviral treatment  
3 regimens[28-31], however only 39 patients of the 76 (51%) confirmed HIV-positive were on ART  
4 at time of presentation, representing 3% of entire subset sample, which possibly dilutes this  
5 effect.  
6  
7  
8  
9

10 Our CRP subset analysis found associations between low HDLC and the pro-  
11 inflammatory marker CRP in patients with newly diagnosed HD in a sex disparate manner, with  
12 a much stronger positive association in women. Median CRP levels were also very high across  
13 all categories of HD aetiology, and are much higher than previous reports in both early analyses  
14 of large cohorts[20] as well as South African studies[32], but reflect the clinical requirements at  
15 presentation. These high levels may also be the result of 'multi-morbidity' observed in the  
16 cohort, given the prevalence of infectious disease (such as HIV/AIDS) as well as other lifestyle  
17 factors that can also influence CRP levels[33]; all of which may have contributed to the high  
18 levels observed. Inflammatory stress may be having a more adverse effect on HDLC in women  
19 compared to men as a result of many causes. The prognostic value of stratifying CVD risk, even  
20 at very high CRP (>10 mg/L) levels, has been demonstrated in a very large cohort of  
21 women[20], and there are reports of elevated CRP in women of African descent[34]. We also  
22 report women as having a significantly higher BMI; obesity itself can induce a low-grade  
23 inflammatory response, however the association between low HDLC and CRP in women  
24 remained even after adjusting for BMI. While we have assumed that the exaggerated drop in  
25 HDLC in women with acute forms of communicable HD is a consequence rather than a cause of  
26 infection, treatment of atherogenic dyslipidaemia and inflammatory markers in women are of  
27 particular clinical relevance in a setting where obesity and its antecedent behaviours are  
28 increasing.  
29  
30  
31  
32  
33  
34  
35  
36  
37  
38  
39  
40  
41  
42  
43  
44  
45  
46  
47  
48  
49  
50  
51

52 These results underscore the need to consider multifactorial CVD risk burden that  
53 recognises that co-occurrence of infectious and non-communicable disease produces significant  
54 and complex health disparities. Certainly, the clinical strategies to protect the heart and vessels  
55 in acute infection differ from those required in chronic infection and it is unlikely that lipid  
56  
57  
58  
59  
60

1 measurements will form a cornerstone of treatment in such cases. However, it is important to  
2 recognise the benefits of early detection and treatment of dyslipidaemia in order to mitigate any  
3 double effect of infectious *and* 'lifestyle' HD risk factors in the longer term. While the  
4 epidemiological evidence is clear, the precise mechanism by which HDLC decreases  
5 atherosclerotic CVD risk remains unclear[11]; indeed, efforts to develop pharmacological  
6 modalities to specifically increase HDLC levels to reduce cardiovascular risk, continues to be  
7 problematic[10] and we acknowledge that addressing the low HDLC observed in this cohort, in  
8 isolation, without commensurate improvements in HDLC functionality, will prove a difficult task.  
9 This does not, however, preclude use of other therapeutic interventions that address the  
10 greater, more complex risk presentation of cases that fall in the 'crossover' between  
11 communicable and non-communicable diseases. For example, the polypill, which includes lipid-  
12 lowering medications, has been proposed as a viable treatment option in secondary prevention,  
13 given its relative ease of use and efficacy in low-income settings[35]. More so, evidence that  
14 statins also exert immunomodulatory effects, along with suggestions they may prove useful in  
15 the treatment and prevention of infections[36], indicate they may have important, multi-faceted  
16 clinical implications in populations such as Soweto, especially given the substantial  
17 dyslipidaemic risk associated with highly-prevalent HIV infection and ART. Attempts to address  
18 prevention, management, cure and control of non-communicable and communicable forms of  
19 HD as entirely separate entities are likely to prove insufficient. This holds true on a per-patient  
20 basis as well as for any population-wide, public health approaches.

21  
22  
23  
24  
25  
26  
27  
28  
29  
30  
31  
32  
33  
34  
35  
36  
37  
38  
39  
40  
41  
42  
43  
44 There are a number of limitations that require consideration. Clinical data (other than  
45 routine echocardiography and 12-lead ECG) were obtained according to presentation. This  
46 study was not specifically designed to comprehensively delineate between specific forms of HD  
47 (resulting in variable clinical data) although this is part of clinical investigation at Baragwanath  
48 Hospital; although it should be noted HIV status is not routinely determined. The arbitrary  
49 selection of disease states into the communicable versus non-communicable groups (e.g.  
50 primary valve disease) may be questioned; hence our further delineation of clearly identifiable  
51 cases of acute inflammation/infection at the point of admission. However, we would emphasise  
52  
53  
54  
55  
56  
57  
58  
59  
60

1 that classification was prospectively applied, the groupings are consistent with our previous  
2 reports that describe in detail the rigorous clinical criteria employed in profiling the 'Heart of  
3 Soweto' cohort, and expected gradients in lipid levels were subsequently found. Systematic bias  
4 needs to be carefully considered before attributing broad patterns in lipid profiles, as those with  
5 suspected atherosclerotic disease were more likely to have had lipid levels measured, reflecting  
6 the low number of those presenting an acute infectious form of HD (for example, patients with  
7 pericarditis). Adiposity, a major confounder of both dyslipidaemia and HD, was recorded in 71%  
8 of the cohort. However, its inclusion in the regression analyses did not alter the significance of  
9 the associations. Central obesity measurements (e.g. waist-to-hip ratio) may have offered  
10 greater delineation of CVD risk but data were not available. CRP was measured in just under  
11 one third of cases and related data requires careful interpretation. Finally, owing to the cross-  
12 sectional design of this study we were not able to investigate the possible effect of the  
13 magnitude and timing of the contributing infection on lipid levels, beyond the data collected at  
14 admission. Given the transient, dynamic processes of lipid metabolism over the course of acute  
15 and chronic diseases, only longitudinal studies of lipid levels and subsequent outcomes can fully  
16 elucidate the clinical importance of our findings.

## 35 **Conclusions**

36 We have shown that despite largely favourable lipid profiles, there are clear differences  
37 according to underlying aetiology of HD in urban Africans however, overall low HDLC was the  
38 most prevalent metabolic abnormality observed in this cohort. Younger Africans with  
39 communicable HD have particularly low levels of HDLC that, if maintained in the longer term,  
40 may leave them at increased risk of atherosclerotic disease. This is physiologically plausible in  
41 chronic infection; however low HDL at hospital admission could also simply reflect similarly low  
42 levels of TC/LDL and may not be indicative of increased long-term CVD risk. That uncertainty  
43 can only be resolved by well-powered studies with adequate follow-up, to provide sufficient  
44 evidence to address current gaps in evidence and, ultimately, guide clinical practice.  
45 Nevertheless if proven, targeted prevention programs that identify and actively manage  
46 individuals with a history of communicable HD (particularly an active case) and with low levels of  
47  
48  
49  
50  
51  
52  
53  
54  
55  
56  
57  
58  
59  
60

1 HDLC may be indicated. The alternative is an increasing burden of non-communicable forms of  
2 HD in urban African communities that is supplemented (in origin and confluence) by historical  
3 cases of communicable disease that have adversely affected protective HDLC levels  
4 (particularly in women).  
5  
6  
7  
8  
9  
10  
11  
12  
13  
14  
15  
16  
17  
18  
19  
20  
21  
22  
23  
24  
25  
26  
27  
28  
29  
30  
31  
32  
33  
34  
35  
36  
37  
38  
39  
40  
41  
42  
43  
44  
45  
46  
47  
48  
49  
50  
51  
52  
53  
54  
55  
56  
57  
58  
59  
60

For peer review only

## Acknowledgements

We thank all the doctors, nurses, and patients who participated in the registry; and Elisabeth Tshele, Bridget Phooko, Maureen Kubheka and Phutuma Mathusi who contributed to the meticulous collection and management of clinical data.

## Competing interests

All authors declare: all authors had financial support from independent funding bodies, including University of the Witwatersrand and unconditional research grants from Adcock-Ingram, the Medtronic Foundation USA, Servier, Bayer-Schering and BHP Billiton, for the submitted work; no financial relationships with any organisations that might have an interest in the submitted work in the previous 3 years; no other relationships or activities that could appear to have influenced the submitted work.

## Funding

The 'Heart of Soweto Study' registry was supported by the University of the Witwatersrand and unconditional research grants from Adcock-Ingram, the Medtronic Foundation USA, Servier, Bayer-Schering and BHP Billiton. SS, MJC and JGL are supported by the National Health & Medical Research Council of Australia [Program Grants 320860 and 631947 and Postgraduate scholarship 586739]. JGL is supported by the National Heart Foundation of Australia and Cardiac Society of Australia and New Zealand. Baker IDI is supported by the Victorian Government's Operational Infrastructure Support Program. KS and SL are supported by the MRC South Africa and the University of Cape Town.

## Author's contributions:

KS, MJC and SS participated in the original design of the study and supervised the collection of data. JGL prepared the first draft of the manuscript, with edits and revisions provided by all authors. FR and FT revised manuscript critically for important intellectual content. All authors

1  
2  
3  
4  
5  
6  
7  
8  
9  
10  
11  
12  
13  
14  
15  
16  
17  
18  
19  
20  
21  
22  
23  
24  
25  
26  
27  
28  
29  
30  
31  
32  
33  
34  
35  
36  
37  
38  
39  
40  
41  
42  
43  
44  
45  
46  
47  
48  
49  
50  
51  
52  
53  
54  
55  
56  
57  
58  
59  
60

had full access to all the data and read and approved the final version of the manuscript. All authors had final responsibility for the decision to submit the manuscript for publication.

**Data sharing statement**

Study data will be available on request from the corresponding author.

For peer review only

## REFERENCES:

1. Yusuf S, Reddy S, Ounpuu S, et al. Global burden of cardiovascular diseases: Part II: variations in cardiovascular disease by specific ethnic groups and geographic regions and prevention strategies. *Circulation* 2001;**104**(23):2855-64
2. Vorster HH. The emergence of cardiovascular disease during urbanisation of Africans. *Public Health Nutr* 2002;**5**(1A):239-43
3. Mensah GA. Descriptive epidemiology of cardiovascular risk factors and diabetes in sub-Saharan Africa. *Progress in cardiovascular diseases* 2013;**56**(3):240-50 doi: 10.1016/j.pcad.2013.10.014[published Online First: Epub Date]].
4. Danaei G, Singh GM, Paciorek CJ, et al. The global cardiovascular risk transition: associations of four metabolic risk factors with national income, urbanization, and Western diet in 1980 and 2008. *Circulation* 2013;**127**(14):1493-502, 502e1-8 doi: 10.1161/CIRCULATIONAHA.113.001470[published Online First: Epub Date]].
5. Mocumbi AO, Sliwa K. Women's cardiovascular health in Africa. *Heart* 2012;**98**(6):450-5 doi: 10.1136/heartjnl-2011-301025[published Online First: Epub Date]].
6. Thienemann F, Sliwa K, Rockstroh JK. HIV and the heart: the impact of antiretroviral therapy: a global perspective. *Eur Heart J* 2013;**34**(46):3538-46 doi: 10.1093/eurheartj/eh388[published Online First: Epub Date]].
7. Sliwa K, Carrington MJ, Becker A, et al. Contribution of the human immunodeficiency virus/acquired immunodeficiency syndrome epidemic to de novo presentations of heart disease in the Heart of Soweto Study cohort. *Eur Heart J* 2012;**33**(7):866-74 doi: 10.1093/eurheartj/ehr398[published Online First: Epub Date]].
8. Stewart S, Carrington M, Pretorius S, et al. Standing at the crossroads between new and historically prevalent heart disease: effects of migration and socio-economic factors in the Heart of Soweto cohort study. *Eur Heart J* 2011;**32**(4):492-9 doi: 10.1093/eurheartj/ehq439[published Online First: Epub Date]].
9. Chapman MJ, Ginsberg HN, Amarenco P, et al. Triglyceride-rich lipoproteins and high-density lipoprotein cholesterol in patients at high risk of cardiovascular disease: evidence and guidance for management. *Eur Heart J* 2011;**32**(11):1345-61 doi: 10.1093/eurheartj/ehr112[published Online First: Epub Date]].
10. Libby P, Ridker PM, Hansson GK. Progress and challenges in translating the biology of atherosclerosis. *Nature* 2011;**473**(7347):317-25 doi: 10.1038/nature10146[published Online First: Epub Date]].
11. Voight BF, Peloso GM, Orho-Melander M, et al. Plasma HDL cholesterol and risk of myocardial infarction: a mendelian randomisation study. *Lancet* 2012;**380**(9841):572-80 doi: 10.1016/S0140-6736(12)60312-2[published Online First: Epub Date]].
12. Huxley RR, Barzi F, Lam TH, et al. Isolated low levels of high-density lipoprotein cholesterol are associated with an increased risk of coronary heart disease: an individual participant data meta-analysis of 23 studies in the Asia-Pacific region. *Circulation* 2011;**124**(19):2056-64 doi: 10.1161/CIRCULATIONAHA.111.028373[published Online First: Epub Date]].
13. Goldbourt U, Yaari S, Medalie JH. Isolated low HDL cholesterol as a risk factor for coronary heart disease mortality. A 21-year follow-up of 8000 men. *Arteriosclerosis, thrombosis, and vascular biology* 1997;**17**(1):107-13
14. deGoma EM, Leeper NJ, Heidenreich PA. Clinical significance of high-density lipoprotein cholesterol in patients with low low-density lipoprotein cholesterol. *Journal of the American College of Cardiology* 2008;**51**(1):49-55 doi: 10.1016/j.jacc.2007.07.086[published Online First: Epub Date]].
15. Khovidhunkit W, Kim MS, Memon RA, et al. Effects of infection and inflammation on lipid and lipoprotein metabolism: mechanisms and consequences to the host. *J Lipid Res*

- 2004;**45**(7):1169-96 doi: 10.1194/jlr.R300019-JLR200[published Online First: Epub Date]].
16. Sliwa K, Lyons JG, Carrington MJ, et al. Different lipid profiles according to ethnicity in the Heart of Soweto study cohort of de novo presentations of heart disease. *Cardiovasc J Afr* 2012;**23**(7):389-95 doi: 10.5830/CVJA-2012-036[published Online First: Epub Date]].
17. Sliwa K, Wilkinson D, Hansen C, et al. Spectrum of heart disease and risk factors in a black urban population in South Africa (the Heart of Soweto Study): a cohort study. *Lancet* 2008;**371**(9616):915-22 doi: 10.1016/S0140-6736(08)60417-1[published Online First: Epub Date]].
18. Friedewald WT, Levy RI, Fredrickson DS. Estimation of the concentration of low-density lipoprotein cholesterol in plasma, without use of the preparative ultracentrifuge. *Clinical chemistry* 1972;**18**(6):499-502
19. Klug E. South African dyslipidaemia guideline consensus statement. *S Afr Med J* 2012;**102**(3 Pt 2):178-87
20. Ridker PM, Cook N. Clinical usefulness of very high and very low levels of C-reactive protein across the full range of Framingham Risk Scores. *Circulation* 2004;**109**(16):1955-9 doi: 10.1161/01.CIR.0000125690.80303.A8[published Online First: Epub Date]].
21. Dhingra R, Gona P, Nam BH, et al. C-reactive protein, inflammatory conditions, and cardiovascular disease risk. *Am J Med* 2007;**120**(12):1054-62 doi: 10.1016/j.amjmed.2007.08.037[published Online First: Epub Date]].
22. Zoratti R. A review on ethnic differences in plasma triglycerides and high-density-lipoprotein cholesterol: is the lipid pattern the key factor for the low coronary heart disease rate in people of African origin? *Eur J Epidemiol* 1998;**14**(1):9-21
23. Ulasi, II, Ijoma CK, Onodugo OD. A community-based study of hypertension and cardio-metabolic syndrome in semi-urban and rural communities in Nigeria. *BMC Health Serv Res* 2010;**10**:71 doi: 10.1186/1472-6963-10-71[published Online First: Epub Date]].
24. Sumner AE, Zhou J, Doumatey A, et al. Low HDL-Cholesterol with Normal Triglyceride Levels is the Most Common Lipid Pattern in West Africans and African Americans with Metabolic Syndrome: Implications for Cardiovascular Disease Prevention. *CVD prevention and control* 2010;**5**(3):75-80 doi: 10.1016/j.cvdpc.2010.07.003[published Online First: Epub Date]].
25. Farzadfar F, Finucane MM, Danaei G, et al. National, regional, and global trends in serum total cholesterol since 1980: systematic analysis of health examination surveys and epidemiological studies with 321 country-years and 3.0 million participants. *Lancet* 2011;**377**(9765):578-86 doi: 10.1016/S0140-6736(10)62038-7[published Online First: Epub Date]].
26. Steyn K, Sliwa K, Hawken S, et al. Risk factors associated with myocardial infarction in Africa: the INTERHEART Africa study. *Circulation* 2005;**112**(23):3554-61 doi: 10.1161/CIRCULATIONAHA.105.563452[published Online First: Epub Date]].
27. Tollman SM, Kahn K, Sartorius B, et al. Implications of mortality transition for primary health care in rural South Africa: a population-based surveillance study. *Lancet* 2008;**372**(9642):893-901 doi: 10.1016/S0140-6736(08)61399-9[published Online First: Epub Date]].
28. Adewole OO, Eze S, Betiku Y, et al. Lipid profile in HIV/AIDS patients in Nigeria. *Afr Health Sci* 2010;**10**(2):144-9
29. Anastos K, Ndamage F, Lu D, et al. Lipoprotein levels and cardiovascular risk in HIV-infected and uninfected Rwandan women. *AIDS Res Ther* 2010;**7**:34 doi: 10.1186/1742-6405-7-34[published Online First: Epub Date]].
30. Armstrong C, Liu E, Okuma J, et al. Dyslipidemia in an HIV-positive antiretroviral treatment-naïve population in Dar es Salaam, Tanzania. *J Acquir Immune Defic Syndr*



- 2011;**57**(2):141-5 doi: 10.1097/QAI.0b013e318219a3d1[published Online First: Epub Date]].
- 1  
2  
3  
4  
5  
6  
7  
8  
9  
10  
11  
12  
13  
14  
15  
16  
17  
18  
19  
20  
21  
22  
23  
24  
25  
26  
27  
28  
29  
30  
31  
32  
33  
34  
35  
36  
37  
38  
39  
40  
41  
42  
43  
44  
45  
46  
47  
48  
49  
50  
51  
52  
53  
54  
55  
56  
57  
58  
59  
60
31. Buchacz K, Weidle PJ, Moore D, et al. Changes in lipid profile over 24 months among adults on first-line highly active antiretroviral therapy in the home-based AIDS care program in rural Uganda. *J Acquir Immune Defic Syndr* 2008;**47**(3):304-11
32. Ntyintyane L, Panz V, Raal FJ, et al. Leptin, adiponectin, and high-sensitivity C-reactive protein in relation to the metabolic syndrome in urban South African blacks with and without coronary artery disease. *Metab Syndr Relat Disord* 2009;**7**(3):243-8
33. Nordestgaard BG. Does elevated C-reactive protein cause human atherothrombosis? Novel insights from genetics, intervention trials, and elsewhere. *Curr Opin Lipidol* 2009;**20**(5):393-401 doi: 10.1097/MOL.0b013e3283307bfe[published Online First: Epub Date]].
34. Albert MA, Glynn RJ, Buring J, et al. C-reactive protein levels among women of various ethnic groups living in the United States (from the Women's Health Study). *Am J Cardiol* 2004;**93**(10):1238-42 doi: 10.1016/j.amjcard.2004.01.067[published Online First: Epub Date]].
35. Yusuf S, Islam S, Chow CK, et al. Use of secondary prevention drugs for cardiovascular disease in the community in high-income, middle-income, and low-income countries (the PURE Study): a prospective epidemiological survey. *Lancet* 2011 doi: 10.1016/S0140-6736(11)61215-4[published Online First: Epub Date]].
36. Tleyjeh IM, Kashour T, Hakim FA, et al. Statins for the prevention and treatment of infections: a systematic review and meta-analysis. *Arch Intern Med* 2009;**169**(18):1658-67 doi: 10.1001/archinternmed.2009.286[published Online First: Epub Date]].

**FIGURE 1 Sex specific lipid profiles according to heart disease aetiology**Figure legend:

Lipid values are shown as mean  $\pm$  standard error. P values indicate between-sex comparisons per aetiology group (T-test), \*\* =  $P < 0.01$ ; \* =  $P < 0.05$ . NCD = non-communicable heart disease; CD = communicable heart disease; TC= total cholesterol; HDL= high-density lipoprotein cholesterol; LDL= low-density lipoprotein. Y-axis dotted lines show thresholds for high TC and LDL or low HDL (sex specific values).

**FIGURE 2 Prevalence of low high-density lipoprotein cholesterol according to heart disease aetiology**Figure legend:

NCD = non-communicable heart disease; CD = communicable heart disease.

High total cholesterol (TC)  $> 4.5$  mmol/L; Low high-density lipoprotein cholesterol (HDLC) ( $< 1.0$  mmol/L in men,  $< 1.2$  mmol/L in women). High low density lipoprotein cholesterol (LDLC)  $> 2.5$  mmol/L; High triglycerides (TGs)  $> 1.7$  mmol/L

**FIGURE 3 Risk of low high-density lipoprotein cholesterol according to C-reactive protein risk group, relative to low-risk C-reactive protein group (n=367)**Figure legend:

Age-adjusted analysis. CRP = C-reactive protein. \*\* =  $P < 0.01$ ; \* =  $P < 0.05$  relative to low CRP group. For confidence intervals, please refer to Results section.

1  
2  
3 **Lower Levels of High-density Lipoprotein Cholesterol in Urban Africans**  
4  
5 **Presenting with Communicable Versus Non-communicable Forms of Heart**  
6  
7 **Disease: The 'Heart of Soweto' hospital registry study**  
8  
9

10  
11  
12 **Short title:** Lyons – HDLC in communicable heart disease  
13

14  
15  
16  
17 **Authors:** Jasmine G. Lyons (1, 2)  
18 Karen Sliwa (3, 4)  
19 Melinda J. Carrington (1, 4, 5)  
20 Frederick Raal (7)  
21 Sandra Pretorius (3)  
22 Friedrich Thienemann (3, 6, 8)  
23 Simon Stewart (1, 3, 4, 5)  
24  
25  
26  
27  
28  
29

30 **Affiliations:**

- 31  
32 (1) Baker IDI Heart and Diabetes Institute, Melbourne, Australia  
33 (2) Division of Health Sciences, University of South Australia, Adelaide, Australia  
34 (3) Hatter Institute for Cardiovascular Research in Africa, Cape Heart Group and IIDMM,  
35 University of Cape Town, Cape Town, South Africa  
36  
37 (4) Soweto Cardiovascular Research Unit, University of the Witwatersrand, Johannesburg,  
38 South Africa  
39  
40 (5) Department of Epidemiology and Preventative Medicine, Monash University, Melbourne,  
41 Australia  
42  
43 (6) Institute of Infectious Diseases and Molecular Medicine, University of Cape Town, South  
44 Africa  
45  
46 (7) Carbohydrate and Lipid Metabolism Research unit, University of the Witwatersrand,  
47 Johannesburg, South Africa  
48  
49 (8) Infectious Diseases Referral Clinic, GF Jooste Hospital, Manenberg, South Africa  
50  
51  
52

53  
54  
55 **Address for Correspondence:** Professor Simon Stewart, Preventative Health, Baker IDI Heart  
56 and Diabetes Institute, PO Box 6492, St Kilda Rd Central, Melbourne, Victoria, 8008, Australia  
57  
58 E-mail: [simon.stewart@bakeridi.edu.au](mailto:simon.stewart@bakeridi.edu.au)  
59  
60

Telephone: +61 3 8532 1640

Fax: +61 3 8532 1100

**Key Words:** High-density lipoprotein, lipids, infection, epidemiologic transition, Africa.

**Word count:** 3540 not including 2 tables, 3 figures and [356](#) references.

For peer review only

1  
2  
3  
4  
5  
6  
7  
8  
9  
10  
11  
12  
13  
14  
15  
16  
17  
18  
19  
20  
21  
22  
23  
24  
25  
26  
27  
28  
29  
30  
31  
32  
33  
34  
35  
36  
37  
38  
39  
40  
41  
42  
43  
44  
45  
46  
47  
48  
49  
50  
51  
52  
53  
54  
55  
56  
57  
58  
59  
60

**ABSTRACT**

**Objectives:** To investigate if urban Africans displayed lower levels of atheroprotective high-density lipoprotein cholesterol (HDLC) when presenting with communicable versus non-communicable forms of heart disease (HD) as both acute infection and chronic inflammation reduce HDLC levels.

**Design:** Hospital registry of 5328 de novo cases of HD over a 3-year period.

**Setting:** Cardiology Unit, Baragwanath Hospital in Soweto, South Africa.

**Participants:** A total of 1199 patients of African descent (59% [femalewomen](#); 57.0±13.4 years) had fasting blood lipid levels (Total cholesterol [TC], triglyceride, HDLC, and low-density lipoprotein [LDLC] cholesterol) documented on admission. Serum inflammatory marker C-reactive protein (CRP) was measured in a sub-set of 367 patients (31% of cases).

**Main outcome measures:** Lipid profiles were compared according to pre-specified classification of non-communicable (e.g. hypertensive HD) versus communicable (e.g. rheumatic HD) HD. Low HDLC was defined as <1.0 mmol/L for [malesmen](#) and <1.2mmol/L for [femaleswomen](#), according to applicable South African Clinical Guidelines.

**Results:** Overall 694 (58%) of those presenting with HD had low HDLC levels; 344 of 678 (51%) and 350 of 521 (67%) for non-communicable and communicable, respectively ( $p<0.001$ ). Comparatively, overall prevalence of high TC was 32% and high LDLC was 37%. On an adjusted basis, those with non-communicable HD were more likely to record a low HDLC relative to non-communicable presentations (OR 1.91, 95%CI 1.42, 2.57;  $p<0.001$ ). There was a strong relationship between low HDLC and higher levels of CRP, but only in [femaleswomen](#).

**Conclusions:** Despite largely favourable lipid profiles, there are clear differences according to aetiology of underlying HD in urban Africans, with younger patients with communicable HD having particularly low levels of HDLC. Appropriate prospective evidence is needed to determine if persistent low levels of HDLC expose patients to increased, long-term risk of atherosclerotic forms of HD. The [femalewomen](#)-only inverse association between HDL-C and CRP warrants further investigation.

## ARTICLE SUMMARY

### Article focus:

- In sub-Saharan Africa, the incidence of non-communicable cardiovascular disease is increasing while, simultaneously, communicable forms of heart disease continue to cause considerable levels of morbidity and mortality.
- In this study, we have sought to explore one heart disease risk factor, dyslipidaemia, in a well-defined clinical registry in Soweto, South Africa.
- Lipid profiles from 1199 de novo presentations of heart disease were compared according to pre-specified classification of non-communicable heart disease (e.g. hypertensive heart disease) versus communicable forms of heart disease (e.g. pericarditis or chronic rheumatic heart disease). We hypothesised that those diagnosed with communicable heart disease would display an adverse lipid profile, with low levels of atheroprotective high-density lipoprotein cholesterol (HDLC). We also investigated the potential interaction of the inflammatory marker C-reactive protein (CRP) and low HDLC in a subset of these patients.

### Key messages:

- We describe distinct patterns of dyslipidaemia according to underlying heart disease aetiology: significantly decreased levels of HDLC, total cholesterol and low-density lipoprotein cholesterol in those with communicable heart disease (representing 43% of cohort) compared to those with non-communicable heart disease (57% of cohort).
- In adjusted analyses, low HDLC was more pronounced in those with communicable heart disease. In those with high CRP levels, we present novel data showing a sex-disparate relationship between CRP and low HDLC, with a strong relationship between high CRP and low HDLC in [femaleswomen](#) only.
- The high prevalence of low HDLC in a relatively young population of urban Africans may, if persistent in the longer-term, confer greater risk of atherosclerotic heart disease

### Strengths and limitations of the study:

- We report a high prevalence of low HDLC in *de novo* presentations of both communicable heart disease and non-communicable heart disease, with a greater prevalence in those with communicable heart disease.
- The study cohort is clinically very well defined; however the lipid data were obtained according to clinical presentation, which may impose systematic bias to the results.
- This hospital registry study has provided preliminary data that would support prospective investigation of longer-term dyslipidaemia patterns and their impact on heart disease incidence, both in South Africa and in other low-and-middle-income countries where the epidemiologic transition is currently underway.

## INTRODUCTION

1  
2  
3  
4  
5  
6  
7  
8  
9  
10  
11  
12  
13  
14  
15  
16  
17  
18  
19  
20  
21  
22  
23  
24  
25  
26  
27  
28  
29  
30  
31  
32  
33  
34  
35  
36  
37  
38  
39  
40  
41  
42  
43  
44  
45  
46  
47  
48  
49  
50  
51  
52  
53  
54  
55  
56  
57  
58  
59  
60

Heart diseases with infectious aetiology have long been the principal forms of cardiovascular disease (CVD) in Sub-Saharan Africa. However, epidemiological transition has seen increased prevalence of non-communicable forms of heart disease in these populations[1]. This phenomenon is largely driven by complex, population-wide changes in demographic, social and economic status, with associated changes in lifestyle habits[2-4]. Indicative of the tension between 'old' and 'new' forms of heart disease, the incidence of communicable heart disease (HD) is sustained by the devastating epidemics of human immunodeficiency virus/acquired immune deficiency syndrome (HIV/AIDS), tuberculosis (TB), rheumatic heart disease (RHD) and parasitic infections with cardiac involvement[5-7], while in parallel, the prevalence of risk factors for non-communicable HD increases[8].

Low serum levels of high-density lipoprotein cholesterol (HDLC) are consistently and independently associated with increased risk of atherosclerotic forms of CVD[9 10]. However, it remains uncertain whether low HDLC is causal or just a cardiovascular risk marker[11]. If we are to extrapolate from studies in Western and Asian populations[12-14], isolated low HDLC is associated with increased risk for CVD in the long-term. There are several causes of low HDLC levels, including overweight, obesity, tobacco smoking, and insulin resistance/type 2 diabetes mellitus, indicative of the important role lifestyle factors have in mediating HDLC levels[9]. Additionally, low HDLC is a striking consequence of abnormal lipid metabolism in infection and inflammation[15]. Although it has been shown that those of African descent largely show a favourable lipid profile characterised by high HDLC levels [16], it is unlikely that they can remain athero-protective during an infected state[15]. Indeed, in this setting, it is probable that increasing prevalence of modifiable/ lifestyle risk factors contribute to a more advanced presentation in those with communicable HD[8]. We have previously reported that in the geographically compact townships that comprise Soweto in South Africa, 'old' and 'new' forms of HD are simultaneously present[8]. While this tension exists, we have a unique opportunity to explore lipid profiles in patients presenting with non-communicable versus communicable forms of HD.



## STUDY HYPOTHESES

Having shown important ethnic differences in the lipid profiles of patients of African descent presenting with HD in the urban African enclave of Soweto[16], we hypothesised that independent of age and sex, urban Africans presenting with communicable HD will demonstrate patterns of dyslipidaemia associated with infection/inflammation, particularly sub-optimal levels of HDLC, versus non-communicable HD.

## METHODS

### Study Setting & Design

As described in detail previously[8 17] the 3,500 bed Chris Hani Baragwanath Hospital (case load of > 125,000 in-patients per annum) services the tertiary care needs of Soweto (population of 1.1 million) and surrounding communities. All suspected cardiac presentations are referred to the hospital's Cardiology Unit for advanced diagnostic testing and gold-standard treatments. A prospective clinical registry of all *de novo* presentations of the same was established in 2006 as part of the Heart of Soweto Study and represents sub-Saharan Africa's largest and most detailed study of advanced forms of HD to date[17].

### Participants

The 'Heart of Soweto' cohort of *de novo* case presentations comprised 5328 patients. Of these, 2185 patients (40%) had a documented fasting lipid profile (serum total cholesterol (TC) level, triglyceride, HDLC and calculated low-density lipoprotein cholesterol (LDLC)[18] undertaken at Baragwanath Hospital on-site pathology). None of the patients were on lipid lowering agents at the time of presentation, as this medication can only be prescribed at the tertiary institution.

However some of the patients had been placed on anti-hypertensive medication prior to their first assessment at the Cardiac Clinic at Baragwanath Hospital. Moreover, only a small number of patients (39 cases) had been prescribed anti-retroviral therapy (ART) on presentation. The study was approved by the University of the Witwatersrand Ethical Committee and conforms to the principles outlined in the Declaration of Helsinki. All patients provided informed consent.

## Study Data

1  
2  
3 A complete list of study data captured by the registry, comprising basic socio-demographic  
4 (including self-reported ethnicity, years of education and determining if the patient was born in  
5 Soweto) and advanced clinical profiling, has been described previously[8 17] The registry  
6  
7 captured all advanced clinical investigative procedures (e.g. coronary angiography, which was  
8  
9 undertaken in all people diagnosed with coronary artery disease (CAD)). Echocardiography  
10  
11 (performed on all patients) criteria used in the study has been described in detail previously[8  
12  
13  
14  
15  
16  
17].

## Case Classifications

18  
19  
20 Adjudication and classification of communicable and non-communicable presentations of HD in  
21  
22 this cohort have been previously described[8]. After exclusion of those with uncomplicated  
23  
24 hypertension (i.e. without evidence of cardiac dysfunction, n=380) or other non-modifiable  
25  
26 aetiologies (e.g. congenital disorders), 1199 patients of African descent (22% of the total 'Heart  
27  
28 of Soweto' cohort) were included in this analysis. Contributory diagnoses for non-communicable  
29  
30 HD were predominantly hypertensive heart failure (HT-HF) and coronary artery disease (without  
31  
32 HIV). Communicable heart disease was predominantly classified as HIV-dilated cardiomyopathy  
33  
34 (HIV-DCMO), HIV-pulmonary hypertension, TB pericardial disease, and pericarditis due to other  
35  
36 infection.  
37  
38

## Risk factor definition

39  
40  
41 Optimum lipid levels and treatment goals with established CVD were defined according to  
42  
43 international guidelines[9] adopted by the Lipid and Atherosclerosis Society of South Africa and  
44  
45 the South African Heart Association - high TC: >4.5 mmol/L, high TGs: >1.7 mmol/L, high LDLC:  
46  
47 >2.5 mmol/L and low HDLC: <1.0 for [malesmen](#) and <1.2 mmol/L for [femaleswomen](#)[19]. Other  
48  
49 risk factors were measured on a clinical basis, as previously described[17]. Anthropometric  
50  
51 measurements were available for calculation of body mass index (BMI, kg/m<sup>2</sup>) in 854 (71%)  
52  
53 cases, the low reporting rate restricted to ambulatory patients. Obesity was defined as BMI ≥ 30  
54  
55 kg/m<sup>2</sup>. Serum C-reactive protein (CRP) was measured in a sub-set of 367 patients (31% of all  
56  
57 cases) if clinically indicated (e.g. suspected infection). Patients were stratified into clinically  
58  
59  
60

1 relevant CRP categories[20], as defined by Dhingra and colleagues[21]. Patients with a CRP of  
2 1 mg/L (n=19) were used as reference group and compared to medium (1.1-3.0 mg/L, n=26),  
3 high (3.1-10.0 mg/L, n=83) and very high (>10.0 mg/L, n=239) CRP categories.  
4  
5

### 6 **Statistical analyses**

7  
8 Normally distributed continuous data are presented as the mean  $\pm$  standard deviation and non-  
9 Gaussian distributed variables as the median (inter-quartile range). Categorical data are  
10 presented as sample number and percentages. For group comparisons, we initially used Chi  
11 Square ( $\chi^2$ ) analysis with calculation of odds ratios (OR) with 95% confidence intervals (CI)  
12 presented where appropriate for discrete variables, and independent T-tests for normally  
13 distributed continuous variables and Mann-Whitney U test for nonparametric continuous  
14 variables. Multiple logistic regression analyses (entry model) were used to derive age and sex  
15 adjusted ORs (and BMI in some analyses, as described) for the risk of presenting with clinically  
16 relevant variables (primarily dyslipidaemia profiles), according to CD HD relative to NCD  
17 diagnosis. Significance was accepted at the two-sided level of  $p < 0.05$ .  
18  
19  
20  
21  
22  
23  
24  
25  
26  
27  
28  
29  
30  
31  
32  
33  
34  
35  
36  
37  
38  
39  
40  
41  
42  
43  
44  
45  
46  
47  
48  
49  
50  
51  
52  
53  
54  
55  
56  
57  
58  
59  
60

## RESULTS

## Clinical and Demographic Profile

**Table 1** shows the socio-demographic and clinical profile of this cohort according to cardiac aetiology. Those presenting with non-communicable HD (n=678, 56.5% of cohort) were older and had higher BMI and mean SBP and DBP than those with communicable HD (n=521, 43.5%; all comparisons p<0.001). Overall, 76 (6%) were confirmed HIV-positive: 15 (2%) and 61 (12%) patients were confirmed HIV-positive in non-communicable and communicable HD groups respectively (P<0.001). Apart from higher BMIs in women (30.6 ± 6.9 vs. 26.7 ± 5.5 kg/m<sup>2</sup> in [malesmen](#), p<0.001) there were no significant differences between sexes in respect to other clinical parameters. To this, the prevalence of obesity in women was 50% as compared to men (26%), P<0.001.

**TABLE 1 Clinical and demographic profile according to heart disease aetiology**

|                                | ALL Cases<br>n=1199 | Non-communicable<br>n=678 (57%) | Communicable<br>n=521 (43%) | P value |
|--------------------------------|---------------------|---------------------------------|-----------------------------|---------|
| <b>Demographic Profile</b>     |                     |                                 |                             |         |
| Mean age (years)               | 58.3<br>±14.0       | 60.1 ± 13.1                     | 55.9 ± 14.9                 | <0.001  |
| <a href="#">FemaleWomen</a>    | 701 (59%)           | 403 (59%)                       | 298 (57%)                   | 0.44    |
| <6 years formal education      | 582 (49%)           | 335 (49%)                       | 247 (47%)                   | 0.52    |
| Soweto origin                  | 562 (47%)           | 327 (48%)                       | 235 (45%)                   | 0.29    |
| <b>Clinical Presentation</b>   |                     |                                 |                             |         |
| Total cholesterol (mmol/L)     | 4.0 ± 1.4           | 4.3 ± 1.3                       | 3.7 ± 1.2                   | <0.001  |
| HDLC (mmol/L)                  | 1.1 ± 0.5           | 1.2 ± 0.5                       | 1.0 ± 0.5                   | <0.001  |
| Median triglycerides (mmol/L)* | 1.1 (0.8,<br>1.5)   | 1.1 (0.8,1.6)                   | 1.0 (0.7, 1.3)              | <0.001  |
| LDLC (mmol/L)                  | 2.4 ± 1.0           | 2.5 ± 1.0                       | 2.2 ± 0.9                   | <0.001  |
| TC:HDLC ratio                  | 4.3 ± 3.0           | 4.2 ± 3.1                       | 4.4 ± 2.7                   | 0.27    |
| LDL:HDLC ratio                 | 2.5 ± 1.1           | 2.5 ± 1.0                       | 2.7 ± 1.1                   | 0.36    |
| TG:HDLC ratio*                 | 1.1 (0.7,<br>1.7)   | 1.0 (0.7, 1.7)                  | 1.1 (0.7, 1.8)              | 0.12    |
| Median serum CRP (mg/L)*       | 19 (7.0,<br>45.0)   | 16.8 (6.6,41.5)                 | 20.5 (7.8, 55.9)            | 0.25    |

|                                                                                                          |            |            |            |        |
|----------------------------------------------------------------------------------------------------------|------------|------------|------------|--------|
| <b>Systolic BP (mmHg)</b>                                                                                | 135 ± 29   | 143 ± 29   | 126 ± 26   | <0.001 |
| <b>Diastolic BP (mmHg)</b>                                                                               | 78 ± 16    | 80 ± 16    | 74 ± 16    | <0.001 |
| <b>BMI (kg/m<sup>2</sup>)</b>                                                                            | 29.0 ± 6.7 | 30.3 ± 6.7 | 27.2 ± 6.2 | <0.001 |
| <b>Prevalence of dyslipidaemia (n, %)</b>                                                                |            |            |            |        |
| <b>High total cholesterol (&gt; 5mmol/L)</b>                                                             | 378 (32%)  | 266 (39%)  | 112 (22%)  | <0.001 |
| <b>Low HDLC (&lt; 1 in <a href="#">malesmen</a> and &lt; 1.2 mmol/L in <a href="#">femaleswomen</a>)</b> | 694 (58%)  | 344 (51%)  | 350 (67%)  | <0.001 |
| <b>High LDLC (&gt; 2.5 mmol/L)</b>                                                                       | 446 (37%)  | 291 (43%)  | 155 (30%)  | <0.001 |
| <b>High triglycerides (&gt; 1.7 mmol/l)</b>                                                              | 215 (18%)  | 143 (21%)  | 72 (14%)   | 0.001  |
| <b>Prevalence of other risk factors (n, %)</b>                                                           |            |            |            |        |
| <b>Obese (BMI &gt;30 kg/m<sup>2</sup>)</b>                                                               | 344 (40%)  | 237 (48%)  | 107 (30%)  | <0.001 |
| <b>Type 2 diabetes</b>                                                                                   | 98 (8%)    | 71 (11%)   | 27 (5%)    | <0.001 |
| <b>Past or current smoker</b>                                                                            | 566 (47%)  | 321(47%)   | 245 (47%)  | 0.95   |
| <b>Family history of CVD</b>                                                                             | 466 (39%)  | 286 (42%)  | 180 (35%)  | 0.01   |
| <b>Confirmed HIV-positive cases</b>                                                                      | 76 (6%)    | 15 (2%)    | 61 (12%)   | <0.001 |

#### Table legend:

LDLC = low-density lipoprotein cholesterol; HDLC = high-density lipoprotein cholesterol; TG = triglycerides; BMI = body mass index (available in 854 cases); CRP = C-reactive protein (available in 367 cases); CVD = cardiovascular disease; HIV = human immunodeficiency virus.

\*Median (interquartile range) values presented, differences tested by Mann-Whitney U test

#### **Aetiology of heart disease (primary diagnosis)**

Overall, the most prevalent primary diagnoses were HT-HF (n=461, 38%), dilated cardiomyopathy (DCMO, n= 178, 15%) and CAD (n=157, 12%). In those classified as non-communicable HD, HT-HF was the main primary diagnosis (n=461, 68%), along with CAD (without concurrent HIV-infection; n=157, 23%). Dilated cardiomyopathy (n=178, 34%), right heart failure (n=92, 18%) and right heart disease (n=63, 12%) and other forms of primary valve

1 disease (n=71, 14%), were the most common diagnoses in those classified with communicable  
2 forms of HD.  
3

#### 4 **Lipid Profiles**

5 Those with communicable HD had significantly lower TC, LDLC, and HDLC compared with  
6 patients with non-communicable HD (**Table 1** and **Figure 1**,  $p < 0.001$  for all comparisons).  
7

8 Overall, women had significantly higher TC ( $4.2 \pm 1.3$  mmol/L vs.  $3.8 \pm 1.2$  mmol/L,  $p < 0.001$ );  
9 LDLC ( $2.4 \pm 1.0$  mmol/L vs.  $2.2 \pm 1.0$  mmol/L,  $p < 0.01$ ), and HDLC compared to men ( $1.2 \pm 0.5$   
10 mmol/L vs.  $1.0 \pm 0.5$  mmol/L,  $p < 0.001$ ). This gender difference did not extend to triglycerides  
11 ( $1.1(0.4-1.8)$  mmol/L vs.  $1.1(0.4-1.8)$ ,  $p = 0.7$ ) nor TC:HDLC ratio ( $4.2 \pm 3.1$  mmol/L vs.  $4.3 \pm 2.7$   
12 mmol/L,  $p = 0.6$ ). Lipid ratios were calculated and compared (**Table 1**). There was no significant  
13 differences between aetiology groups for either TC:HDL or TG:HDL groups. However LDL:HDL  
14 ratios were significantly higher in the communicable group.  
15

16 Levels of TC (Figure 1A), HDLC (Figure 1B) and LDLC (Figure 1C) were significantly higher in  
17 [females](#) with non-communicable HD (**Figure 1**). However in those diagnosed with  
18 communicable HD, small, but significant, differences were observed only for TC and HDLC, not  
19 LDL (**Figure 1**). Overall, prevalence of dyslipidaemia varied from 18% of patients with high  
20 triglycerides to 58% with low HDLC (**Table 1** and **Figure 2**). Consistent with the decrease  
21 observed with the actual levels, prevalence of high TC and high LDLC was increased in those  
22 with non-communicable HD aetiologies while low HDLC levels prevalence was higher in those  
23 with communicable HD (**Table 1** and **Figure 2**). There were no patients with TG levels  $> 4.5$   
24 mmol/L (range 0.1-3.8 mmol/L) which makes use of the Friedewald equation suitable for this  
25 cohort[18].  
26

27 **Table 2** shows independent associations between relevant socio-economic, demographic and  
28 clinical variables and communicable HD aetiology, relative to those presenting with non-  
29 communicable HD. The effect of HD aetiology on low HDLC dyslipidaemia was strong and  
30 consistent: adjusting for age, sex and BMI of patients, those with forms of communicable HD  
31 were significantly more likely to record a low HDLC relative to those presenting with non-  
32 communicable HD (**Table 2**,  $p < 0.001$ ) and less likely to record high TC and LDLC (**Table 2**).  
33  
34  
35  
36  
37  
38  
39  
40  
41  
42  
43  
44  
45  
46  
47  
48  
49  
50  
51  
52  
53  
54  
55  
56  
57  
58  
59  
60

Patients with communicable HD were less likely to record high triglyceride levels (OR 0.65, 95%CI 0.51, 0.84,  $p < 0.05$ ) compared to those with non-communicable HD.

**TABLE 2 Independent correlates of communicable heart disease, relative to non-communicable heart disease**

|                                          | Communicable disease |               |
|------------------------------------------|----------------------|---------------|
|                                          | Odds Ratio           | 95% CI        |
| <b>Female</b> <del>Women</del> -sex      | 0.91                 | 0.72, 1.15    |
| <b>Age</b>                               | 0.98                 | 0.97, 0.99**  |
| <b>Obesity</b>                           | 0.50                 | 0.37, 0.68*** |
| <b>&lt; 6 years formal education</b>     | 1.11                 | 0.88, 1.42    |
| <b>Soweto origin</b>                     | 0.98                 | 0.77, 1.24    |
| <b>Body mass index adjusted analysis</b> |                      |               |
| <b>High TC</b>                           | 0.52                 | 0.37, 0.71*** |
| <b>High LDLC</b>                         | 0.56                 | 0.41, 0.76*** |
| <b>Low HDLC</b>                          | 1.91                 | 1.42, 2.57*** |
| <b>High TG</b>                           | 0.65                 | 0.51, 0.84*   |

Table legend:

Obesity BMI  $> 30 \text{ kg/m}^2$ ; High total cholesterol (TC)  $> 4.5 \text{ mmol/L}$ ; High low density lipoprotein (LDLC)  $> 2.5 \text{ mmol/L}$ ; Low high density lipoprotein (HDLC) ( $< 1.0 \text{ mmol/L}$  in [malesmen](#),  $< 1.2 \text{ mmol/L}$  in [femaleswomen](#)). OR = odds ratio; CI = confidence intervals. Age and sex-adjusted analysis: \*  $p < 0.05$ ; \*\* $p < 0.01$ ; \*\*\* $p < 0.001$ .

**CRP subset analysis**

Overall, there was no significant difference in CRP levels between aetiology groups (**Table 1**). The proportion of confirmed HIV cases in this CRP subset analysis was 7% ( $n=27$ ). Of those, 23 were in the very high-risk category. There was also no association between CRP-derived risk categories and high TC, LDLC or triglycerides (data not shown). However the risk of having low HDLC increased with increasing CRP levels. In age and sex-adjusted analyses, those with

1 medium risk (OR 2.73, 95% CI 0.68, 10.89, P=0.16), high risk (OR 4.98, 95% CI 1.46, 17.00,  
2 P=0.01) and very high risk (OR 6.37, 95% CI 1.97, 20.57, p<0.01) CRP levels were significantly  
3 more likely to record a low HDLC relative to those in the low risk CRP group. Also, when  
4 stratified by sex, a strong, positive association remained in [females/women](#) but was no longer  
5 apparent in [males/men](#) (**Figure 3**). In [females/women](#), the pattern was significant across all CRP  
6 risk categories: compared to low risk, those with medium risk (OR 12.1, 95% CI 1.21, 120,  
7 p=0.03), high risk (OR 14.4, 95% CI 1.64, 126, p=0.02) and very high risk (OR 23.5, 95% CI  
8 2.81, 197, p=0.004) CRP levels were all more likely to record a low HDLC. Moreover, the  
9 association was not weakened by addition of BMI into the model (BMI and CRP measurements  
10 available in only 230 cases) in overall and [female/women](#)-only (n=133) models: those with  
11 medium risk (OR 20.5, 95% CI 1.72, 246, p=0.02), high risk (OR 10.6, 95% CI 1.14, 98.8,  
12 p=0.04) and very high risk (OR 21.0, 95% CI 2.38, 185, p<0.01) CRP levels were all more likely  
13 to record a low HDLC.  
14  
15  
16  
17  
18  
19  
20  
21  
22  
23  
24  
25  
26  
27  
28  
29  
30  
31  
32  
33  
34  
35  
36  
37  
38  
39  
40  
41  
42  
43  
44  
45  
46  
47  
48  
49  
50  
51  
52  
53  
54  
55  
56  
57  
58  
59  
60



## DISCUSSION

1  
2 We report significant decreases in lipid levels (TC, HDLC and LDLC) and age and BMI  
3 according to non-communicable and communicable manifestations of *de novo* HD in urban  
4 Africans, patterns that were observed in both sexes. The high prevalence of low HDLC in more  
5 than half of all cases, but much higher in those with communicable HD, is most striking. Also, it  
6 appears that gender is an effect modifier in the relationship between CRP and low HDLC in this  
7 cohort, but, importantly, the relationship remains even after adjustment for the significant  
8 confounder of adiposity.  
9

10  
11 While traditionally uncommon[22], dyslipidaemia, in particular low HDLC, is becoming  
12 more prevalent in sub-Saharan Africa[23 24]. The low lipid levels present in the majority of  
13 cases with communicable HD reflects the dramatic changes to lipid metabolism observed in  
14 infection and is therefore, anticipated. We acknowledge that atherogenic LDLC is also low in  
15 this setting and that low HDLC may not be indicative of particularly increased disease risk, at  
16 least in the short-term. However we still deem this as highly clinically relevant given that even  
17 isolated low HDLC is associated with a higher risk of atherosclerotic forms of HD, a finding that  
18 has been seen in diverse populations[12-14]. Interestingly triglyceride levels were not  
19 significantly increased in those with communicable forms of HD, despite evidence that it can  
20 increase as part of the infectious/inflammatory metabolic milieu[15]. Additionally, we speculate  
21 that the higher lipid levels in women may be the result of much higher rates of obesity (50%  
22 compared with 26% in men) as the driver of elevated total cholesterol, which has been  
23 suggested by authors of a worldwide systematic analysis on high TC [25].  
24  
25

26  
27 Our interest in this phenomenon predominantly relates to the longer-term effects of low  
28 HDLC, especially when observed together with the amplified vascular risk associated with  
29 chronic infection[15]. In Africa, where acute coronary syndromes are seen in a relatively young  
30 population[26], we predict the very high rates of myriad communicable disease[27 28] will result  
31 in more complex cases, with potentially poorer outcomes in the long-term, given the critical role  
32 of HDLC in both innate and adaptive immunity[15]. While many infectious diseases (bacterial  
33 and viral) have contributed to the underlying pathology of HD reported here[5], dyslipidemia  
34  
35  
36  
37  
38  
39  
40  
41  
42  
43  
44  
45  
46  
47  
48  
49  
50  
51  
52  
53  
54  
55  
56  
57  
58  
59  
60

1 associated with HIV infection has been particularly well studied. HIV-related low HDLC is likely a  
2 consequence of both the viral infection and an adverse effect of some anti-retroviral treatment  
3 regimens[28-31], however only 39 patients of the 76 (51%) confirmed HIV-positive were on ART  
4 at time of presentation, representing 3% of entire subset sample, which possibly dilutes this  
5 effect.  
6  
7  
8  
9

10 Our CRP subset analysis found associations between low HDLC and the pro-  
11 inflammatory marker CRP in patients with newly diagnosed HD in a sex disparate manner, with  
12 a much stronger positive association in [femaleswomen](#). Median CRP levels were also very high  
13 across all categories of HD aetiology, and are much higher than previous reports in both early  
14 analyses of large cohorts[20] as well as South African studies[32], but reflect the clinical  
15 requirements at presentation. These high levels may also be the result of 'multi-morbidity'  
16 observed in the cohort, given the prevalence of infectious disease (such as HIV/AIDS) as well  
17 as other lifestyle factors that can also influence CRP levels[33]; all of which may have  
18 contributed to the high levels observed. Inflammatory stress may be having a more adverse  
19 effect on HDLC in women compared to men as a result of many causes. The prognostic value  
20 of stratifying CVD risk, even at very high CRP (>10 mg/L) levels, has been demonstrated in a  
21 very large [female-cohort\\_of\\_women](#)[20], and there are reports of elevated CRP in [womenfemale](#)  
22 [populations](#) of African descent[34]. We also report [femaleswomen](#) as having a significantly  
23 higher BMI; obesity itself can induce a low-grade inflammatory response, however the  
24 association between low HDLC and CRP in women remained even after adjusting for BMI.  
25 While we have assumed that the exaggerated drop in HDLC in women with acute forms of  
26 communicable HD is a consequence rather than a cause of infection, treatment of atherogenic  
27 dyslipidaemia and inflammatory markers in women are of particular clinical relevance in a  
28 setting where obesity and its antecedent behaviours are increasing.  
29  
30  
31  
32  
33  
34  
35  
36  
37  
38  
39  
40  
41  
42  
43  
44  
45  
46  
47  
48  
49  
50  
51

52 These results underscore the need to consider multifactorial CVD risk burden that  
53 recognises that co-occurrence of infectious and non-communicable disease produces significant  
54 and complex health disparities. Certainly, the clinical strategies to protect the heart and vessels  
55 in acute infection differ from those required in chronic infection and it is unlikely that lipid  
56  
57  
58  
59  
60

1 measurements will form a cornerstone of treatment in such cases. However, it is important to  
2 recognise the benefits of early detection and treatment of dyslipidaemia in order to mitigate any  
3 double effect of infectious *and* 'lifestyle' HD risk factors in the longer term. While the  
4 epidemiological evidence is clear, the precise mechanism by which HDLC decreases  
5 atherosclerotic CVD risk remains unclear[11]; indeed, efforts to develop pharmacological  
6 modalities to specifically increase HDLC levels to reduce cardiovascular risk, continues to be  
7 problematic[10] and we acknowledge that addressing the low HDLC observed in this cohort, in  
8 isolation, without commensurate improvements in HDLC functionality, will prove a difficult task.  
9 This does not, however, preclude use of other therapeutic interventions that address the  
10 greater, more complex risk presentation of cases that fall in the 'crossover' between  
11 communicable and non-communicable diseases. For example, the polypill, which includes lipid-  
12 lowering medications, has been proposed as a viable treatment option in secondary prevention,  
13 given its relative ease of use and efficacy in low-income settings[35]. More so, evidence that  
14 statins also exert immunomodulatory effects, along with suggestions they may prove useful in  
15 the treatment and prevention of infections[36], indicate they may have important, multi-faceted  
16 clinical implications in populations such as Soweto, especially given the substantial  
17 dyslipidaemic risk associated with highly-prevalent HIV infection and ART. Attempts to address  
18 prevention, management, cure and control of non-communicable and communicable forms of  
19 HD as entirely separate entities are likely to prove insufficient. This holds true on a per-patient  
20 basis as well as for any population-wide, public health approaches.

21  
22  
23  
24  
25  
26  
27  
28  
29  
30  
31  
32  
33  
34  
35  
36  
37  
38  
39  
40  
41  
42  
43  
44  
45  
46  
47  
48  
49  
50  
51  
52  
53  
54  
55  
56  
57  
58  
59  
60  
There are a number of limitations that require consideration. Clinical data (other than routine echocardiography and 12-lead ECG) were obtained according to presentation. This study was not specifically designed to comprehensively delineate between specific forms of HD (resulting in variable clinical data) although this is part of clinical investigation at Baragwanath Hospital; although it should be noted HIV status is not routinely determined. The arbitrary selection of disease states into the communicable versus non-communicable groups (e.g. primary valve disease) may be questioned; hence our further delineation of clearly identifiable cases of acute inflammation/infection at the point of admission. However, we would emphasise

1 that classification was prospectively applied, the groupings are consistent with our previous  
2 reports that describe in detail the rigorous clinical criteria employed in profiling the 'Heart of  
3 Soweto' cohort, and expected gradients in lipid levels were subsequently found. Systematic bias  
4 needs to be carefully considered before attributing broad patterns in lipid profiles, as those with  
5 suspected atherosclerotic disease were more likely to have had lipid levels measured, reflecting  
6 the low number of those presenting an acute infectious form of HD (for example, patients with  
7 pericarditis). Adiposity, a major confounder of both dyslipidaemia and HD, was recorded in 71%  
8 of the cohort. However, its inclusion in the regression analyses did not alter the significance of  
9 the associations. Central obesity measurements (e.g. waist-to-hip ratio) may have offered  
10 greater delineation of CVD risk but data were not available. CRP was measured in just under  
11 one third of cases and related data requires careful interpretation. Finally, owing to the cross-  
12 sectional design of this study we were not able to investigate the possible effect of the  
13 magnitude and timing of the contributing infection on lipid levels, beyond the data collected at  
14 admission. Given the transient, dynamic processes of lipid metabolism over the course of acute  
15 and chronic diseases, only longitudinal studies of lipid levels and subsequent outcomes can fully  
16 elucidate the clinical importance of our findings.

## 35 Conclusions

36 We have shown that despite largely favourable lipid profiles, there are clear differences  
37 according to underlying aetiology of HD in urban Africans however, overall low HDLC was the  
38 most prevalent metabolic abnormality observed in this cohort. Younger Africans with  
39 communicable HD have particularly low levels of HDLC that, if maintained in the longer term,  
40 may leave them at increased risk of atherosclerotic disease. This is physiologically plausible in  
41 chronic infection; however low HDL at hospital admission could also simply reflect similarly low  
42 levels of TC/LDL and may not be indicative of increased long-term CVD risk. That uncertainty  
43 can only be resolved by well-powered studies with adequate follow-up, to provide sufficient  
44 evidence to address current gaps in evidence and, ultimately, guide clinical practice.  
45 Nevertheless if proven, targeted prevention programs that identify and actively manage  
46 individuals with a history of communicable HD (particularly an active case) and with low levels of  
47  
48  
49  
50  
51  
52  
53  
54  
55  
56  
57  
58  
59  
60

1 HDLC may be indicated. The alternative is an increasing burden of non-communicable forms of  
2 HD in urban African communities that is supplemented (in origin and confluence) by historical  
3 cases of communicable disease that have adversely affected protective HDLC levels  
4 (particularly in women).  
5  
6  
7  
8  
9  
10  
11  
12  
13  
14  
15  
16  
17  
18  
19  
20  
21  
22  
23  
24  
25  
26  
27  
28  
29  
30  
31  
32  
33  
34  
35  
36  
37  
38  
39  
40  
41  
42  
43  
44  
45  
46  
47  
48  
49  
50  
51  
52  
53  
54  
55  
56  
57  
58  
59  
60

For peer review only

## Acknowledgements

We thank all the doctors, nurses, and patients who participated in the registry; and Elisabeth Tshele, Bridget Phooko, Maureen Kubheka and Phutuma Mathusi who contributed to the meticulous collection and management of clinical data.

## Competing interests

All authors declare: all authors had financial support from independent funding bodies, including University of the Witwatersrand and unconditional research grants from Adcock-Ingram, the Medtronic Foundation USA, Servier, Bayer-Schering and BHP Billiton, for the submitted work; no financial relationships with any organisations that might have an interest in the submitted work in the previous 3 years; no other relationships or activities that could appear to have influenced the submitted work.

## Funding

The 'Heart of Soweto Study' registry was supported by the University of the Witwatersrand and unconditional research grants from Adcock-Ingram, the Medtronic Foundation USA, Servier, Bayer-Schering and BHP Billiton. SS, MJC and JGL are supported by the National Health & Medical Research Council of Australia [Program Grants 320860 and 631947 and Postgraduate scholarship 586739]. JGL is supported by the National Heart Foundation of Australia and Cardiac Society of Australia and New Zealand. Baker IDI is supported by the Victorian Government's Operational Infrastructure Support Program. KS and SL are supported by the MRC South Africa and the University of Cape Town.

## Author's contributions:

KS, MJC and SS participated in the original design of the study and supervised the collection of data. JGL prepared the first draft of the manuscript, with edits and revisions provided by all authors. FR and FT revised manuscript critically for important intellectual content. All authors

1 had full access to all the data and read and approved the final version of the manuscript. All  
2 authors had final responsibility for the decision to submit the manuscript for publication.  
3  
4  
5

### 6 **Data sharing statement**

7  
8 Study data will be available on request from the corresponding author.  
9  
10  
11  
12  
13  
14  
15  
16  
17  
18  
19  
20  
21  
22  
23  
24  
25  
26  
27  
28  
29  
30  
31  
32  
33  
34  
35  
36  
37  
38  
39  
40  
41  
42  
43  
44  
45  
46  
47  
48  
49  
50  
51  
52  
53  
54  
55  
56  
57  
58  
59  
60

For peer review only

## REFERENCES:

1. Yusuf S, Reddy S, Ounpuu S, Anand S. Global burden of cardiovascular diseases: Part II: variations in cardiovascular disease by specific ethnic groups and geographic regions and prevention strategies. *Circulation* 2001;**104**(23):2855-64
2. Vorster HH. The emergence of cardiovascular disease during urbanisation of Africans. *Public Health Nutr* 2002;**5**(1A):239-43
3. Mensah GA. Descriptive epidemiology of cardiovascular risk factors and diabetes in sub-Saharan Africa. *Progress in cardiovascular diseases* 2013;**56**(3):240-50 doi: 10.1016/j.pcad.2013.10.014[published Online First: Epub Date]].
4. Danaei G, Singh GM, Paciorek CJ, et al. The global cardiovascular risk transition: associations of four metabolic risk factors with national income, urbanization, and Western diet in 1980 and 2008. *Circulation* 2013;**127**(14):1493-502, 502e1-8 doi: 10.1161/CIRCULATIONAHA.113.001470[published Online First: Epub Date]].
5. Mocumbi AO, Sliwa K. Women's cardiovascular health in Africa. *Heart* 2012;**98**(6):450-5 doi: 10.1136/heartjnl-2011-301025[published Online First: Epub Date]].
6. Thienemann F, Sliwa K, Rockstroh JK. HIV and the heart: the impact of antiretroviral therapy: a global perspective. *Eur Heart J* 2013;**34**(46):3538-46 doi: 10.1093/eurheartj/eh388[published Online First: Epub Date]].
7. Sliwa K, Carrington MJ, Becker A, Thienemann F, Ntsekhe M, Stewart S. Contribution of the human immunodeficiency virus/acquired immunodeficiency syndrome epidemic to de novo presentations of heart disease in the Heart of Soweto Study cohort. *Eur Heart J* 2012;**33**(7):866-74 doi: 10.1093/eurheartj/ehr398[published Online First: Epub Date]].
8. Stewart S, Carrington M, Pretorius S, Methusi P, Sliwa K. Standing at the crossroads between new and historically prevalent heart disease: effects of migration and socio-economic factors in the Heart of Soweto cohort study. *Eur Heart J* 2011;**32**(4):492-9 doi: 10.1093/eurheartj/ehq439[published Online First: Epub Date]].
9. Chapman MJ, Ginsberg HN, Amarenco P, et al. Triglyceride-rich lipoproteins and high-density lipoprotein cholesterol in patients at high risk of cardiovascular disease: evidence and guidance for management. *Eur Heart J* 2011;**32**(11):1345-61 doi: 10.1093/eurheartj/ehr112[published Online First: Epub Date]].
10. Libby P, Ridker PM, Hansson GK. Progress and challenges in translating the biology of atherosclerosis. *Nature* 2011;**473**(7347):317-25 doi: 10.1038/nature10146[published Online First: Epub Date]].
11. Voight BF, Peloso GM, Orho-Melander M, et al. Plasma HDL cholesterol and risk of myocardial infarction: a mendelian randomisation study. *Lancet* 2012;**380**(9841):572-80 doi: 10.1016/S0140-6736(12)60312-2[published Online First: Epub Date]].
12. Huxley RR, Barzi F, Lam TH, et al. Isolated low levels of high-density lipoprotein cholesterol are associated with an increased risk of coronary heart disease: an individual participant data meta-analysis of 23 studies in the Asia-Pacific region. *Circulation* 2011;**124**(19):2056-64 doi: 10.1161/CIRCULATIONAHA.111.028373[published Online First: Epub Date]].
13. Goldbourt U, Yaari S, Medalie JH. Isolated low HDL cholesterol as a risk factor for coronary heart disease mortality. A 21-year follow-up of 8000 men. *Arteriosclerosis, thrombosis, and vascular biology* 1997;**17**(1):107-13
14. deGoma EM, Leeper NJ, Heidenreich PA. Clinical significance of high-density lipoprotein cholesterol in patients with low low-density lipoprotein cholesterol. *Journal of the American College of Cardiology* 2008;**51**(1):49-55 doi: 10.1016/j.jacc.2007.07.086[published Online First: Epub Date]].
15. Khovidhunkit W, Kim MS, Memon RA, et al. Effects of infection and inflammation on lipid and lipoprotein metabolism: mechanisms and consequences to the host. *J Lipid Res*



- 2004;**45**(7):1169-96 doi: 10.1194/jlr.R300019-JLR200[published Online First: Epub Date]].
16. Sliwa K, Lyons JG, Carrington MJ, et al. Different lipid profiles according to ethnicity in the Heart of Soweto study cohort of de novo presentations of heart disease. *Cardiovasc J Afr* 2012;**23**(7):389-95 doi: 10.5830/CVJA-2012-036[published Online First: Epub Date]].
  17. Sliwa K, Wilkinson D, Hansen C, et al. Spectrum of heart disease and risk factors in a black urban population in South Africa (the Heart of Soweto Study): a cohort study. *Lancet* 2008;**371**(9616):915-22 doi: 10.1016/S0140-6736(08)60417-1[published Online First: Epub Date]].
  18. Friedewald WT, Levy RI, Fredrickson DS. Estimation of the concentration of low-density lipoprotein cholesterol in plasma, without use of the preparative ultracentrifuge. *Clinical chemistry* 1972;**18**(6):499-502
  19. Klug E. South African dyslipidaemia guideline consensus statement. *S Afr Med J* 2012;**102**(3 Pt 2):178-87
  20. Ridker PM, Cook N. Clinical usefulness of very high and very low levels of C-reactive protein across the full range of Framingham Risk Scores. *Circulation* 2004;**109**(16):1955-9 doi: 10.1161/01.CIR.0000125690.80303.A8[published Online First: Epub Date]].
  21. Dhingra R, Gona P, Nam BH, et al. C-reactive protein, inflammatory conditions, and cardiovascular disease risk. *Am J Med* 2007;**120**(12):1054-62 doi: 10.1016/j.amjmed.2007.08.037[published Online First: Epub Date]].
  22. Zoratti R. A review on ethnic differences in plasma triglycerides and high-density-lipoprotein cholesterol: is the lipid pattern the key factor for the low coronary heart disease rate in people of African origin? *Eur J Epidemiol* 1998;**14**(1):9-21
  23. Ulasi, II, Ijoma CK, Onodugo OD. A community-based study of hypertension and cardio-metabolic syndrome in semi-urban and rural communities in Nigeria. *BMC Health Serv Res* 2010;**10**:71 doi: 10.1186/1472-6963-10-71[published Online First: Epub Date]].
  24. Sumner AE, Zhou J, Doumatey A, et al. Low HDL-Cholesterol with Normal Triglyceride Levels is the Most Common Lipid Pattern in West Africans and African Americans with Metabolic Syndrome: Implications for Cardiovascular Disease Prevention. *CVD prevention and control* 2010;**5**(3):75-80 doi: 10.1016/j.cvdpc.2010.07.003[published Online First: Epub Date]].
  25. Farzadfar F, Finucane MM, Danaei G, et al. National, regional, and global trends in serum total cholesterol since 1980: systematic analysis of health examination surveys and epidemiological studies with 321 country-years and 3.0 million participants. *Lancet* 2011;**377**(9765):578-86 doi: 10.1016/S0140-6736(10)62038-7[published Online First: Epub Date]].
  26. Steyn K, Sliwa K, Hawken S, et al. Risk factors associated with myocardial infarction in Africa: the INTERHEART Africa study. *Circulation* 2005;**112**(23):3554-61 doi: 10.1161/CIRCULATIONAHA.105.563452[published Online First: Epub Date]].
  27. Tollman SM, Kahn K, Sartorius B, Collinson MA, Clark SJ, Garenne ML. Implications of mortality transition for primary health care in rural South Africa: a population-based surveillance study. *Lancet* 2008;**372**(9642):893-901 doi: 10.1016/S0140-6736(08)61399-9[published Online First: Epub Date]].
  28. Adewole OO, Eze S, Betiku Y, et al. Lipid profile in HIV/AIDS patients in Nigeria. *Afr Health Sci* 2010;**10**(2):144-9
  29. Anastos K, Ndamage F, Lu D, et al. Lipoprotein levels and cardiovascular risk in HIV-infected and uninfected Rwandan women. *AIDS Res Ther* 2010;**7**:34 doi: 10.1186/1742-6405-7-34[published Online First: Epub Date]].
  30. Armstrong C, Liu E, Okuma J, et al. Dyslipidemia in an HIV-positive antiretroviral treatment-naïve population in Dar es Salaam, Tanzania. *J Acquir Immune Defic Syndr*

- 2011;**57**(2):141-5 doi: 10.1097/QAI.0b013e318219a3d1[published Online First: Epub Date]].
- 1  
2  
3  
4  
5  
6  
7  
8  
9  
10  
11  
12  
13  
14  
15  
16  
17  
18  
19  
20  
21  
22  
23  
24  
25  
26  
27  
28  
29  
30  
31  
32  
33  
34  
35  
36  
37  
38  
39  
40  
41  
42  
43  
44  
45  
46  
47  
48  
49  
50  
51  
52  
53  
54  
55  
56  
57  
58  
59  
60
31. Buchacz K, Weidle PJ, Moore D, et al. Changes in lipid profile over 24 months among adults on first-line highly active antiretroviral therapy in the home-based AIDS care program in rural Uganda. *J Acquir Immune Defic Syndr* 2008;**47**(3):304-11
32. Ntyintyane L, Panz V, Raal FJ, Gill G. Leptin, adiponectin, and high-sensitivity C-reactive protein in relation to the metabolic syndrome in urban South African blacks with and without coronary artery disease. *Metab Syndr Relat Disord* 2009;**7**(3):243-8
33. Nordestgaard BG. Does elevated C-reactive protein cause human atherothrombosis? Novel insights from genetics, intervention trials, and elsewhere. *Curr Opin Lipidol* 2009;**20**(5):393-401 doi: 10.1097/MOL.0b013e3283307bfe[published Online First: Epub Date]].
34. Albert MA, Glynn RJ, Buring J, Ridker PM. C-reactive protein levels among women of various ethnic groups living in the United States (from the Women's Health Study). *Am J Cardiol* 2004;**93**(10):1238-42 doi: 10.1016/j.amjcard.2004.01.067[published Online First: Epub Date]].
35. Yusuf S, Islam S, Chow CK, et al. Use of secondary prevention drugs for cardiovascular disease in the community in high-income, middle-income, and low-income countries (the PURE Study): a prospective epidemiological survey. *Lancet* 2011 doi: 10.1016/S0140-6736(11)61215-4[published Online First: Epub Date]].
36. Tleyjeh IM, Kashour T, Hakim FA, et al. Statins for the prevention and treatment of infections: a systematic review and meta-analysis. *Arch Intern Med* 2009;**169**(18):1658-67 doi: 10.1001/archinternmed.2009.286[published Online First: Epub Date]].

**FIGURE 1 Sex specific lipid profiles according to heart disease aetiology**Figure legend:

Lipid values are shown as mean  $\pm$  standard error. P values indicate between-sex comparisons per aetiology group (T-test), \*\* =  $P < 0.01$ ; \* =  $P < 0.05$ . NCD = non-communicable heart disease; CD = communicable heart disease; TC= total cholesterol; HDL= high-density lipoprotein cholesterol; LDL= low-density lipoprotein. Y-axis dotted lines show thresholds for high TC and LDL or low HDL (sex specific values).

**FIGURE 2 Prevalence of low high-density lipoprotein cholesterol according to heart disease aetiology**Figure legend:

NCD = non-communicable heart disease; CD = communicable heart disease.

High total cholesterol (TC)  $> 4.5$  mmol/L; Low high-density lipoprotein cholesterol (HDLC) ( $< 1.0$  mmol/L in [malesmen](#),  $< 1.2$  mmol/L in [femaleswomen](#)). High low density lipoprotein cholesterol (LDLC)  $> 2.5$  mmol/L; High triglycerides (TGs)  $> 1.7$  mmol/L

**FIGURE 3 Risk of low high-density lipoprotein cholesterol according to C-reactive protein risk group, relative to low-risk C-reactive protein group (n=367)**Figure legend:

Age-adjusted analysis. CRP = C-reactive protein. \*\* =  $P < 0.01$ ; \* =  $P < 0.05$  relative to low CRP group. For confidence intervals, please refer to Results section.

1  
2  
3  
4  
5  
6  
7  
8  
9  
10  
11  
12  
13  
14  
15  
16  
17  
18  
19  
20  
21  
22  
23  
24  
25  
26  
27  
28  
29  
30  
31  
32  
33  
34  
35  
36  
37  
38  
39  
40  
41  
42  
43  
44  
45  
46  
47  
48  
49  
50  
51  
52  
53  
54  
55  
56  
57  
58  
59  
60

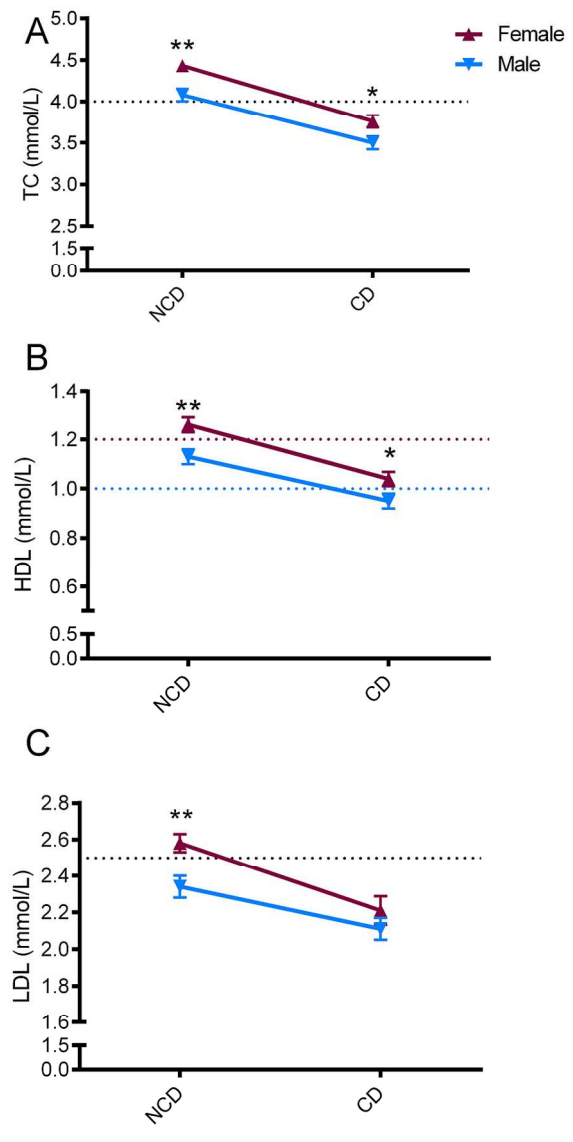

90x171mm (300 x 300 DPI)

1  
2  
3  
4  
5  
6  
7  
8  
9  
10  
11  
12  
13  
14  
15  
16  
17  
18  
19  
20  
21  
22  
23  
24  
25  
26  
27  
28  
29  
30  
31  
32  
33  
34  
35  
36  
37  
38  
39  
40  
41  
42  
43  
44  
45  
46  
47  
48  
49  
50  
51  
52  
53  
54  
55  
56  
57  
58  
59  
60

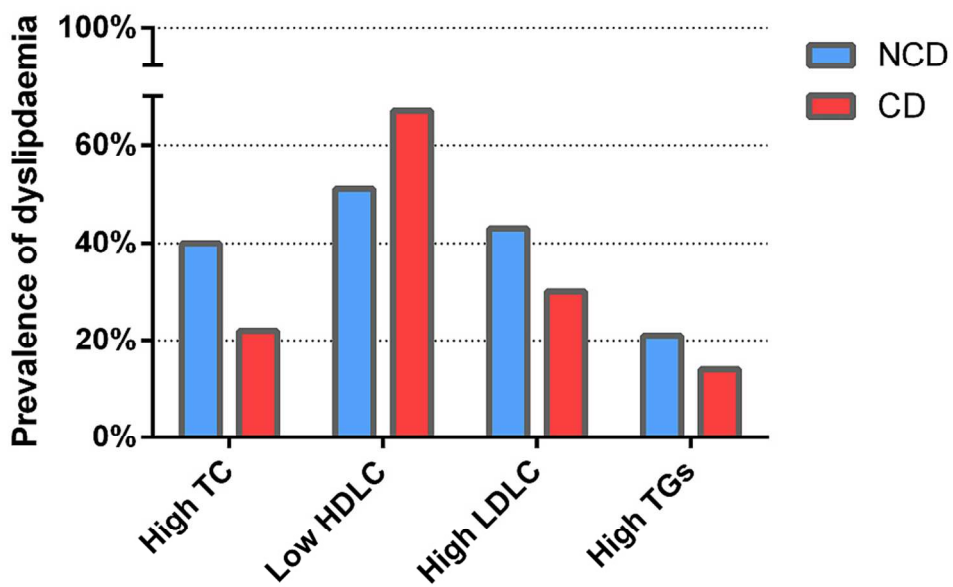

90x58mm (300 x 300 DPI)

Review only

1  
2  
3  
4  
5  
6  
7  
8  
9  
10  
11  
12  
13  
14  
15  
16  
17  
18  
19  
20  
21  
22  
23  
24  
25  
26  
27  
28  
29  
30  
31  
32  
33  
34  
35  
36  
37  
38  
39  
40  
41  
42  
43  
44  
45  
46  
47  
48  
49  
50  
51  
52  
53  
54  
55  
56  
57  
58  
59  
60

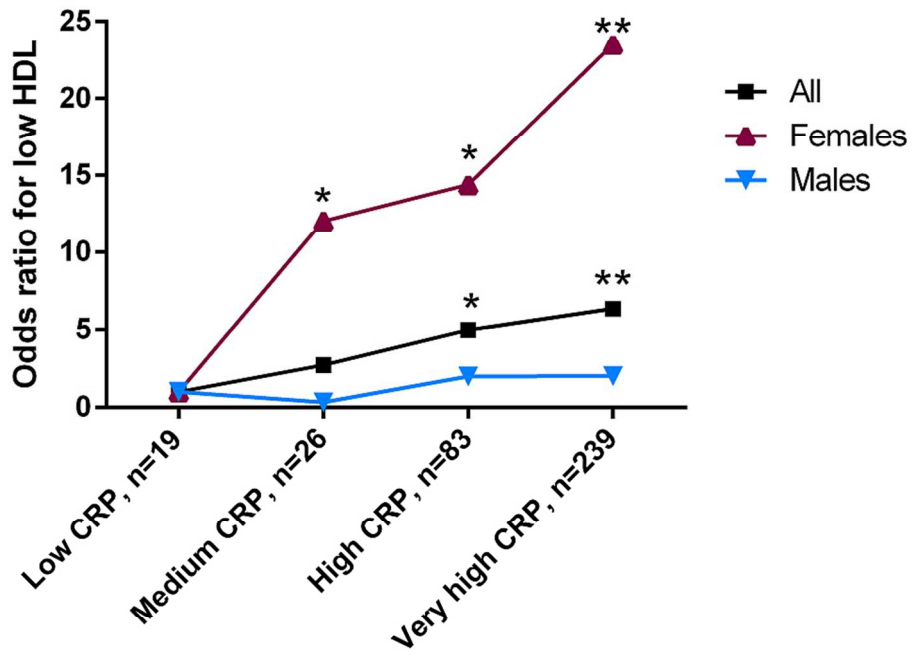

90x69mm (300 x 300 DPI)

Review only

STROBE Statement—Checklist of items that should be included in reports of *cross-sectional studies*

Completed for the article: *Lower Levels of High-density Lipoprotein Cholesterol in Urban Africans Presenting with Communicable Versus Non-communicable Forms of Heart Disease: The ‘Heart of Soweto’ hospital registry study*

Date: 22 June 2014

|                              | Item No | Recommendation                                                                                                                                                                                    | Complete                 |
|------------------------------|---------|---------------------------------------------------------------------------------------------------------------------------------------------------------------------------------------------------|--------------------------|
| <b>Title and abstract</b>    | 1       | (a) Indicate the study’s design with a commonly used term in the title or the abstract                                                                                                            | <input type="checkbox"/> |
|                              |         | (b) Provide in the abstract an informative and balanced summary of what was done and what was found                                                                                               | <input type="checkbox"/> |
| <b>Introduction</b>          |         |                                                                                                                                                                                                   |                          |
| Background/rationale         | 2       | Explain the scientific background and rationale for the investigation being reported                                                                                                              | <input type="checkbox"/> |
| Objectives                   | 3       | State specific objectives, including any prespecified hypotheses                                                                                                                                  | <input type="checkbox"/> |
| <b>Methods</b>               |         |                                                                                                                                                                                                   |                          |
| Study design                 | 4       | Present key elements of study design early in the paper                                                                                                                                           | <input type="checkbox"/> |
| Setting                      | 5       | Describe the setting, locations, and relevant dates, including periods of recruitment, exposure, follow-up, and data collection                                                                   | <input type="checkbox"/> |
| Participants                 | 6       | (a) Give the eligibility criteria, and the sources and methods of selection of participants                                                                                                       | <input type="checkbox"/> |
| Variables                    | 7       | Clearly define all outcomes, exposures, predictors, potential confounders, and effect modifiers. Give diagnostic criteria, if applicable                                                          | <input type="checkbox"/> |
| Data sources/<br>measurement | 8*      | For each variable of interest, give sources of data and details of methods of assessment (measurement). Describe comparability of assessment methods if there is more than one group              | <input type="checkbox"/> |
| Bias                         | 9       | Describe any efforts to address potential sources of bias                                                                                                                                         | <input type="checkbox"/> |
| Study size                   | 10      | Explain how the study size was arrived at                                                                                                                                                         | <input type="checkbox"/> |
| Quantitative variables       | 11      | Explain how quantitative variables were handled in the analyses. If applicable, describe which groupings were chosen and why                                                                      | <input type="checkbox"/> |
| Statistical methods          | 12      | (a) Describe all statistical methods, including those used to control for confounding                                                                                                             | <input type="checkbox"/> |
|                              |         | (b) Describe any methods used to examine subgroups and interactions                                                                                                                               | <input type="checkbox"/> |
|                              |         | (c) Explain how missing data were addressed                                                                                                                                                       | <input type="checkbox"/> |
|                              |         | (d) If applicable, describe analytical methods taking account of sampling strategy                                                                                                                | <input type="checkbox"/> |
|                              |         | (e) Describe any sensitivity analyses                                                                                                                                                             | N/A                      |
| <b>Results</b>               |         |                                                                                                                                                                                                   |                          |
| Participants                 | 13*     | (a) Report numbers of individuals at each stage of study—eg numbers potentially eligible, examined for eligibility, confirmed eligible, included in the study, completing follow-up, and analysed | <input type="checkbox"/> |
|                              |         | (b) Give reasons for non-participation at each stage                                                                                                                                              | <input type="checkbox"/> |
|                              |         | (c) Consider use of a flow diagram                                                                                                                                                                | N/A                      |
| Descriptive data             | 14*     | (a) Give characteristics of study participants (eg demographic, clinical, social) and information on exposures and potential confounders                                                          | <input type="checkbox"/> |

|                          |     |                                                                                                                                                                                                              |     |
|--------------------------|-----|--------------------------------------------------------------------------------------------------------------------------------------------------------------------------------------------------------------|-----|
|                          |     | (b) Indicate number of participants with missing data for each variable of interest                                                                                                                          | □   |
| Outcome data             | 15* | Report numbers of outcome events or summary measures                                                                                                                                                         | □   |
| Main results             | 16  | (a) Give unadjusted estimates and, if applicable, confounder-adjusted estimates and their precision (eg, 95% confidence interval). Make clear which confounders were adjusted for and why they were included | □   |
|                          |     | (b) Report category boundaries when continuous variables were categorized                                                                                                                                    | N/A |
|                          |     | (c) If relevant, consider translating estimates of relative risk into absolute risk for a meaningful time period                                                                                             | N/A |
| Other analyses           | 17  | Report other analyses done—eg analyses of subgroups and interactions, and sensitivity analyses                                                                                                               | □   |
| <b>Discussion</b>        |     |                                                                                                                                                                                                              |     |
| Key results              | 18  | Summarise key results with reference to study objectives                                                                                                                                                     | □   |
| Limitations              | 19  | Discuss limitations of the study, taking into account sources of potential bias or imprecision. Discuss both direction and magnitude of any potential bias                                                   | □   |
| Interpretation           | 20  | Give a cautious overall interpretation of results considering objectives, limitations, multiplicity of analyses, results from similar studies, and other relevant evidence                                   | □   |
| Generalisability         | 21  | Discuss the generalisability (external validity) of the study results                                                                                                                                        | □   |
| <b>Other information</b> |     |                                                                                                                                                                                                              |     |
| Funding                  | 22  | Give the source of funding and the role of the funders for the present study and, if applicable, for the original study on which the present article is based                                                | □   |

\*Give information separately for exposed and unexposed groups.
